# Supplementary material for: Iodine-mediated electrochemical C(sp3)–H cyclization: the synthesis of quinazolinone-fused N-heterocycles
Source: Royal Society of Chemistry journal article supplement (doi:10.1039/d1cc05865g), 2021-12-02

# Supporting Information

## Iodine-Mediated Electrochemical C(sp<sup>3</sup>)-H Cyclization: Access to Quinazolinone-Fused N-Heterocycles

Yan Zhang,<sup>a</sup> Zhenghong Zhou,<sup>a</sup> Zhibin Li,<sup>a</sup> Kangfei Hu,<sup>a</sup> Zhenggen Zha<sup>\*a</sup> and Zhiyong Wang<sup>\*a</sup>

<sup>a</sup>Hefei National Laboratory for Physical Sciences at Microscale, CAS Key Laboratory of Soft Matter Chemistry & Center for Excellence in Molecular Synthesis of Chinese Academy of Sciences, Collaborative Innovation Center of Suzhou Nano Science and Technology & School of Chemistry and Materials Science, University of Science and Technology of China, Hefei 230026, China

### Table of Contents

|                                           |     |
|-------------------------------------------|-----|
| General Information .....                 | S2  |
| Experimental Procedure .....              | S2  |
| Optimization of reaction conditions ..... | S3  |
| Cyclic Voltammetric Experiment .....      | S4  |
| Detail Descriptions for Products .....    | S5  |
| References .....                          | S17 |
| Copies of Product NMR Spectra .....       | S18 |

## General Information

Unless otherwise noted, materials were obtained from commercial suppliers and used without further purification. NMR spectra were recorded on a Bruker AV-500 ( $^1\text{H}$ : 500 MHz,  $^{13}\text{C}$ : 125 Hz) spectrometer using TMS as internal reference. Chemical shifts ( $\delta$ ) and coupling constants (J) were expressed in ppm and Hz, respectively. The following calibration was used:  $\text{CDCl}_3$   $\delta$  = 7.26 and 77.16 ppm, DMSO  $\delta$  = 2.50 and 39.70 ppm. High resolution mass spectra (HRMS) were measured using electrospray ionization (ESI) and the time-of-flight (TOF) mass analyzer. The anode electrode and cathode electrode all are Pt ( $1.0 \times 1.0 \text{ cm}^2$ ). These electrodes are commercially available from GaossUnion, China.

## Experimental Procedure

**Typical Procedure A for the Electrosynthesis of 2-Quinoliny-quinazolin-4(3H)-ones:** An undivided cell was equipped with a magnet stirrer, platinum plate ( $1.0 \times 1.0 \text{ cm}^2$ ) electrode, as the working electrode and counter electrode. The substrate 2-aminobenzamide **1a** (0.3 mmol), 2-methylquinoline **2a** (0.33 mmol),  $\text{H}_2\text{C}_2\text{O}_4$  (0.6 mmol), electrolyte  $\text{NH}_4\text{I}$  (0.06 mmol) and  $\text{NH}_4\text{BF}_4$  (0.3 mmol) were added to the solvent DMF (3 mL). The electrolysis was conducted in an undivided cell at oil bath (100 °C). After the reaction was completed, the reaction system was allowed to attain room temperature and extracted with ethyl acetate ( $3 \times 20 \text{ mL}$ ), and then the organic layer was washed with brine ( $2 \times 10 \text{ mL}$ ) and dried with anhydrous  $\text{Na}_2\text{SO}_4$ . Subsequently, the solvent was removed under reduced pressure and the remaining crude product was purified by column chromatography over silica gel (PE/EtOAc = 5:1) to afford the corresponding products.

**Typical Procedure B for the Electrosynthesis of 2-Pyridinyl-quinazolin-4(3H)-ones:** An undivided cell was equipped with a magnet stirrer, platinum plate ( $1.0 \times 1.0 \text{ cm}^2$ ) electrode, as the working electrode and counter electrode. The substrate 2-aminobenzamide **1a** (0.3 mmol), 2-methylpyridine **2r** (0.6 mmol),  $\text{Ph}_2\text{PO}_2\text{H}$  (0.6 mmol), electrolyte KI (0.3 mmol) were added to the solvent DMSO (3 mL). The electrolysis was conducted in an undivided cell at oil bath (120 °C). After the reaction was completed, the reaction system was allowed to attain room temperature and extracted with ethyl acetate ( $3 \times 20 \text{ mL}$ ), and then the organic layer was washed with brine ( $2 \times 10 \text{ mL}$ ) and dried with anhydrous  $\text{Na}_2\text{SO}_4$ . Subsequently, the solvent was removed under reduced pressure and the remaining crude product was purified by column chromatography over silica gel (PE/EtOAc = 8:1) to afford the corresponding products.

**Gram-scale synthesis of 3aa and 3an:** An undivided cell was equipped with a magnet stirrer, platinum plate ( $1.5 \times 1.5 \text{ cm}^2$ ) electrode, as the working electrode and counter electrode. The substrate 2-aminobenzamide **1a** (5 mmol), *N*-heteroaromatics **2** (5.5 mmol),  $\text{NH}_4\text{I}$  (1.0 mmol) and  $\text{NH}_4\text{BF}_4$  (5 mmol) were added to the solvent DMF (50 mL). The electrolysis was electrolyzed ( $J = 10 \text{ mA/cm}^2$ ,  $I = 23 \text{ mA}$ ) in an undivided cell at oil bath (100 °C). After the reaction was completed (about 2 days), the reaction system was allowed to attain room temperature. Then the reaction mixture was concentrated under reduced pressure.  $\text{H}_2\text{O}$  (100 mL) was added the reaction system was extracted with ethyl acetate ( $3 \times 100 \text{ mL}$ ). Subsequently, the organic layer was washed with brine ( $2 \times 100 \text{ mL}$ ) and dried with anhydrous  $\text{Na}_2\text{SO}_4$ . Finally, the solvent was removed under reduced pressure and the remaining crude product was purified by column chromatography over silica gel (PE/EtOAc = 5:1) to afford the corresponding products.

**Table S1. Optimization of reaction conditions**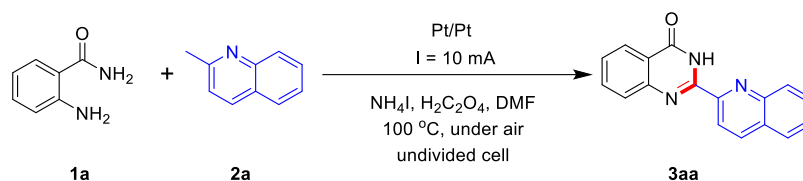

| Entry | Variations from standard conditions                                                                                              | Yield(%) <sup>b</sup> |
|-------|----------------------------------------------------------------------------------------------------------------------------------|-----------------------|
| 1     | None                                                                                                                             | 93                    |
| 2     | DMA as the solvent                                                                                                               | 68                    |
| 3     | NMP as the solvent                                                                                                               | trace                 |
| 4     | Bu <sub>4</sub> NI as the electrolyte                                                                                            | 81                    |
| 5     | KI as the electrolyte                                                                                                            | 76                    |
| 6     | NH <sub>4</sub> Br, NH <sub>4</sub> Cl as the electrolyte                                                                        | n. d <sup>c</sup>     |
| 7     | without acid                                                                                                                     | 34                    |
| 8     | 0.2 equivalent NH <sub>4</sub> I with 1.0 equivalent NH <sub>4</sub> BF <sub>4</sub> instead of 1.0 equivalent NH <sub>4</sub> I | 95                    |
| 9     | 0.1 equivalent NH <sub>4</sub> I instead of 0.2 equivalent NH <sub>4</sub> I                                                     | 35                    |
| 10    | 0.3 equivalent NH <sub>4</sub> I instead of 0.2 equivalent NH <sub>4</sub> I                                                     | 91                    |
| 11    | 90°C instead of 100°C                                                                                                            | 67                    |
| 12    | 110°C instead of 100°C                                                                                                           | 86                    |
| 13    | 5mA instead of 10mA                                                                                                              | 90                    |
| 14    | 15mA instead of 10mA                                                                                                             | 73                    |
| 15    | without electricity                                                                                                              | n.d                   |

<sup>a</sup> Reaction conditions: 1a (0.3 mmol), 2a (0.33 mmol), H<sub>2</sub>C<sub>2</sub>O<sub>4</sub> (0.6 mmol), NH<sub>4</sub>I (0.3 mmol) and DMF (3 mL); the electrolysis was conducted in an undivided cell at an oil bath (T = 100 °C) for 10 h, Pt/Pt, air. <sup>b</sup> The isolated yields after column chromatography. <sup>c</sup> Not detected.

## Figure S1. Cyclic Voltammetric (CV) Experiment

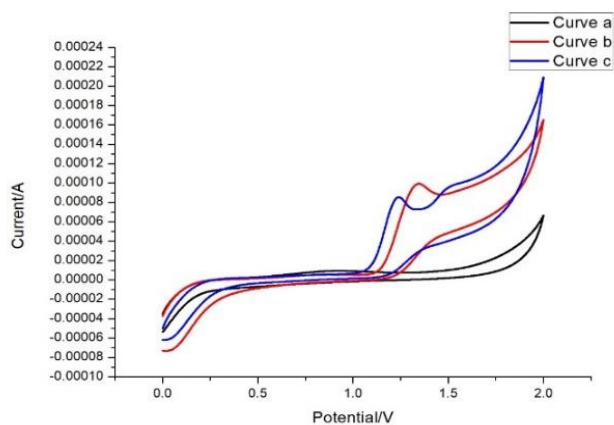

**Figure S1.** Cyclic voltammograms of intermediate **5** and related compounds in 0.1 M  $\text{NH}_4\text{BF}_4/\text{DMF}$  using a Pt disk as the working electrode, and Pt wire and Ag/AgCl as the counter and reference electrodes, at a scan rate of 100 mV/s: background (curve a), intermediate **5** (5 mmol/L) (curve b), and intermediate **5** (5 mmol/L) and  $\text{H}_2\text{C}_2\text{O}_4$  (10 mmol/L) (curve c).

**Figure S1** showed that the oxidation wave of intermediate **5** was decreased in the presence of oxalic acid, indicating that the addition of oxalic acid was beneficial to the oxidation of the intermediate (curves b and c in **Figure S1**).

## Detail descriptions for products

### 2-(quinolin-2-yl)quinazolin-4(3H)-one (3aa)<sup>1</sup>:

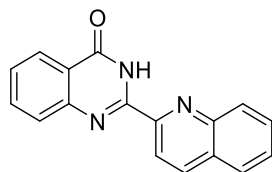

The title compound was prepared according to the general working procedure A and purified by column chromatography (petroleum ether/ethyl acetate = 5/1) to give the product as white solid. 96% yield, 78.7 mg, <sup>1</sup>H NMR (500 MHz, CDCl<sub>3</sub>) δ 11.20 (s, 1H), 8.64 (d, *J* = 8.5 Hz, 1H), 8.36 (dd, *J* = 13.7, 8.2 Hz, 2H), 8.15 (d, *J* = 8.4 Hz, 1H), 7.92 - 7.84 (m, 2H), 7.80 (dd, *J* = 13.6, 7.0 Hz, 2H), 7.63 (t, *J* = 7.5 Hz, 1H), 7.53 (t, *J* = 7.5 Hz, 1H). <sup>13</sup>C NMR (125 MHz, CDCl<sub>3</sub>) δ 161.6 (s), 149.3 (s), 149.1 (s), 148.2 (s), 146.9 (s), 137.8 (s), 134.7 (s), 130.6 (s), 129.8 (s), 129.4 (s), 128.4 (s), 128.4 (s), 127.9 (s), 127.7 (s), 126.9 (s), 122.8 (s), 118.6 (s).

### 6-Fluoro-2-(quinolin-2-yl)quinazolin-4(3H)-one (3ba)<sup>2</sup>:

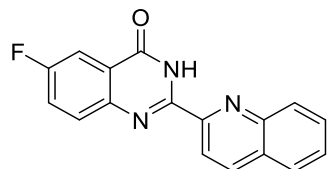

The title compound was prepared according to the general working procedure A and purified by column chromatography (petroleum ether/ethyl acetate = 5/1) to give the product as yellow solid. 95% yield, 83.3 mg. <sup>1</sup>H NMR (500 MHz, CDCl<sub>3</sub>) δ 11.23 (s, 1H), 8.61 (d, *J* = 8.6 Hz, 1H), 8.34 (d, *J* = 8.5 Hz, 1H), 8.14 (d, *J* = 8.3 Hz, 1H), 7.99 (dd, *J* = 8.3, 2.9 Hz, 1H), 7.92 - 7.85 (m, 2H), 7.82 - 7.78 (m, 1H), 7.67 - 7.63 (m, 1H), 7.54 - 7.49 (m, 1H). <sup>13</sup>C NMR (125 MHz, CDCl<sub>3</sub>) δ 161.5 (d, *J* = 248.4 Hz), 160.8 (d, *J* = 3.2 Hz), 148.6 (s), 147.9 (s), 146.9 (s), 145.8 (s), 137.8 (s), 130.7 (d, *J* = 5.3 Hz), 129.8 (s), 129.4 (s), 128.5 (s), 127.9 (s), 124.2 (d, *J* = 8.4 Hz), 123.2 (d, *J* = 23.9 Hz), 118.5 (s), 112.1 (d, *J* = 23.7 Hz).

### 6-chloro-2-(quinolin-2-yl)quinazolin-4(3H)-one (3ca)<sup>1</sup>:

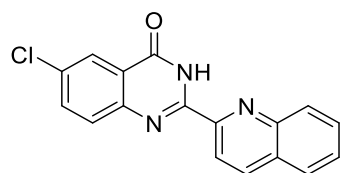

The title compound was prepared according to the general working procedure A and purified by column chromatography (petroleum ether/ethyl acetate = 5/1) to give the product as yellow solid. 67% yield, 61.8 mg. <sup>1</sup>H NMR (500 MHz, CDCl<sub>3</sub>) δ 11.26 (s, 1H), 8.63 (d, *J* = 8.3 Hz, 1H), 8.36 (d, *J* = 8.4 Hz, 1H), 8.34 (s, 1H), 8.16 (d, *J* = 8.3 Hz, 1H), 7.91 (d, *J* = 8.0 Hz, 1H), 7.86 - 7.77 (m, 2H), 7.74 (d, *J* = 8.5 Hz, 1H), 7.66 (t, *J* = 7.3 Hz, 1H). <sup>13</sup>C NMR (125 MHz, CDCl<sub>3</sub>) δ 160.5 (s), 149.4 (s), 147.8 (s), 147.7 (s), 146.9 (s), 137.9 (s), 135.2 (s), 133.6 (s), 130.8 (s), 129.9 (s), 129.8 (s), 129.5 (s), 128.6 (s), 127.9 (s), 126.5 (s), 123.9 (s), 118.6 (s).

### 6-bromo-2-(quinolin-2-yl)quinazolin-4(3H)-one (3da):

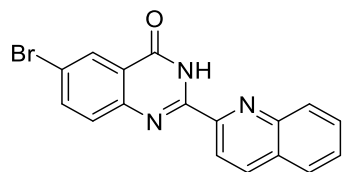

The title compound was prepared according to the general working procedure A and purified by column chromatography (petroleum ether/ethyl acetate = 5/1) to give the product as white solid. 81% yield, 85.3 mg.  $^1\text{H NMR}$  (500 MHz,  $\text{CDCl}_3$ )  $\delta$  11.26 (s, 1H), 8.62 (d,  $J$  = 8.6 Hz, 1H), 8.50 (s, 1H), 8.36 (d,  $J$  = 8.5 Hz, 1H), 8.15 (d,  $J$  = 8.5 Hz, 1H), 7.94 - 7.86 (m, 2H), 7.82 (t,  $J$  = 7.6 Hz, 1H), 7.74 (d,  $J$  = 8.6 Hz, 1H), 7.66 (t,  $J$  = 7.5 Hz, 1H).  $^{13}\text{C NMR}$  (125 MHz,  $\text{CDCl}_3$ )  $\delta$  160.4 (s), 149.5 (s), 148.1 (s), 147.8 (s), 146.9 (s), 137.9 (d,  $J$  = 3.2 Hz), 130.8 (s), 130.1 (s), 129.8 (s), 129.6 (s), 129.5 (s), 128.6 (s), 127.9 (s), 124.2 (s), 121.4 (s), 118.6 (s). HRMS calcd.  $[\text{C}_{17}\text{H}_{10}\text{BrN}_3\text{O} + \text{H}]^+$ : 352.0085, found: 352.0084.

**6-iodo-2-(quinolin-2-yl)quinazolin-4(3H)-one (3ea)<sup>2</sup>:**

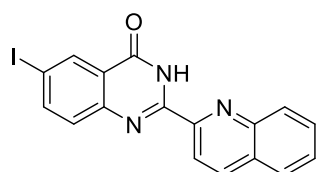

The title compound was prepared according to the general working procedure A and purified by column chromatography (petroleum ether/ethyl acetate = 5/1) to give the product as yellow solid. 83% yield, 99.3 mg.  $^1\text{H NMR}$  (500 MHz,  $\text{CDCl}_3$ )  $\delta$  11.26 (s, 1H), 8.70 (d,  $J$  = 2.0 Hz, 1H), 8.63 (d,  $J$  = 8.6 Hz, 1H), 8.36 (d,  $J$  = 8.5 Hz, 1H), 8.15 (d,  $J$  = 8.5 Hz, 1H), 8.06 (dd,  $J$  = 8.5, 2.1 Hz, 1H), 7.91 (d,  $J$  = 8.0 Hz, 1H), 7.84 - 7.79 (m, 1H), 7.68 - 7.63 (m, 1H), 7.60 (d,  $J$  = 8.5 Hz, 1H).  $^{13}\text{C NMR}$  (125 MHz,  $\text{CDCl}_3$ )  $\delta$  160.1 (s), 149.6 (s), 148.5 (s), 147.7 (s), 146.9 (s), 143.6 (s), 137.9 (s), 135.9 (s), 130.8 (s), 130.0 (s), 129.8 (s), 129.5 (s), 128.6 (s), 127.9 (s), 124.3 (s), 118.6 (s), 92.5 (s).

**2-(quinolin-2-yl)-6-(trifluoromethyl)quinazolin-4(3H)-one (3fa):**

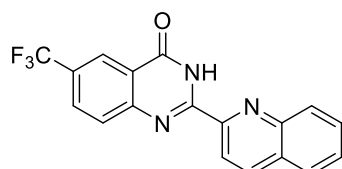

The title compound was prepared according to the general working procedure A and purified by column chromatography (petroleum ether/ethyl acetate = 5/1) to give the product as yellow solid. 58% yield, 59.4 mg.  $^1\text{H NMR}$  (500 MHz,  $\text{CDCl}_3$ )  $\delta$  11.36 (s, 1H), 8.69 - 8.63 (m, 2H), 8.39 (d,  $J$  = 8.5 Hz, 1H), 8.17 (d,  $J$  = 8.4 Hz, 1H), 8.03 - 7.94 (m, 2H), 7.92 (d,  $J$  = 8.1 Hz, 1H), 7.83 (t,  $J$  = 7.3 Hz, 1H), 7.67 (t,  $J$  = 7.3 Hz, 1H).  $^{13}\text{C NMR}$  (125 MHz,  $\text{CDCl}_3$ )  $\delta$  160.8 (s), 151.5 (s), 150.9 (s), 147.6 (s), 146.9 (s), 138.1 (s), 138.0 (s), 131.0 (q,  $J$  = 3.2 Hz), 130.9 (s), 129.9 (s), 129.7 (s), 129.5 (q,  $J$  = 33.2 Hz), 129.4 (s), 129.3 (s), 128.8 (s), 128.0 (s), 123.8 (q,  $J$  = 263.5 Hz), 118.7 (s). HRMS calcd.  $[\text{C}_{18}\text{H}_{10}\text{F}_3\text{N}_3\text{O} + \text{H}]^+$ : 342.0854, found: 342.0859.

**5-bromo-2-(quinolin-2-yl)quinazolin-4(3H)-one (3ha):**

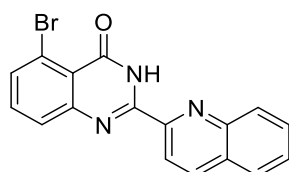

The title compound was prepared according to the general working procedure A and purified by column chromatography (petroleum ether/ethyl acetate = 5/1) to give the product as white solid. 71% yield, 75.0 mg. <sup>1</sup>H NMR (500 MHz, CDCl<sub>3</sub>) δ 11.08 (s, 1H), 8.61 (d, *J* = 8.4 Hz, 1H), 8.35 (d, *J* = 8.3 Hz, 1H), 8.19 (d, *J* = 8.1 Hz, 1H), 7.90 (d, *J* = 8.0 Hz, 1H), 7.82 (dd, *J* = 14.5, 7.7 Hz, 2H), 7.73 (d, *J* = 7.6 Hz, 1H), 7.65 (t, *J* = 7.2 Hz, 1H), 7.55 (t, *J* = 7.7 Hz, 1H). <sup>13</sup>C NMR (125 MHz, CDCl<sub>3</sub>) δ 159.7 (s), 151.4 (s), 149.4 (s), 147.5 (s), 146.9 (s), 137.9 (s), 134.4 (s), 134.2 (s), 130.8 (s), 129.9 (s), 129.5 (s), 128.6 (s), 128.3 (s), 127.9 (s), 121.8 (s), 120.9 (s), 118.6 (s). HRMS calcd. [C<sub>17</sub>H<sub>10</sub>BrN<sub>3</sub>O + H]<sup>+</sup>: 352.0085, found: 352.0089.

**8-fluoro-2-(quinolin-2-yl)quinazolin-4(3H)-one (3ia):**

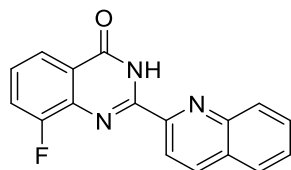

The title compound was prepared according to the general working procedure A and purified by column chromatography (petroleum ether/ethyl acetate = 5/1) to give the product as yellow solid. 69% yield, 60.2 mg. <sup>1</sup>H NMR (500 MHz, CDCl<sub>3</sub>) δ 11.26 (s, 1H), 8.69 (d, *J* = 8.5 Hz, 1H), 8.35 (d, *J* = 8.6 Hz, 1H), 8.14 (d, *J* = 8.1 Hz, 2H), 7.90 (d, *J* = 8.0 Hz, 1H), 7.83 - 7.77 (m, 1H), 7.64 (t, *J* = 7.2 Hz, 1H), 7.56 - 7.50 (m, 1H), 7.50 - 7.44 (m, 1H). <sup>13</sup>C NMR (125 MHz, CDCl<sub>3</sub>) δ 160.6 (d, *J* = 3.1 Hz), 157.8 (d, *J* = 256.3 Hz), 149.4 (s), 147.8 (s), 146.8 (s), 138.7 (d, *J* = 11.7 Hz), 137.9 (s), 130.7 (s), 129.8 (s), 129.6 (s), 128.6 (s), 127.9 (s), 127.7 (d, *J* = 7.5 Hz), 124.7 (s), 122.4 (d, *J* = 4.3 Hz), 120.3 (d, *J* = 19.2 Hz), 118.8 (s). HRMS calcd. [C<sub>17</sub>H<sub>10</sub>FN<sub>3</sub>O + H]<sup>+</sup>: 292.0886, found: 292.0887.

**6-methyl-2-(quinolin-2-yl)quinazolin-4(3H)-one (3ja)<sup>1</sup>:**

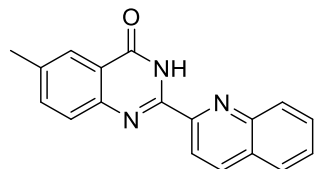

The title compound was prepared according to the general working procedure A and purified by column chromatography (petroleum ether/ethyl acetate = 5/1) to give the product as white solid. 90% yield, 77.8 mg. <sup>1</sup>H NMR (500 MHz, CDCl<sub>3</sub>) δ 11.19 (s, 1H), 8.64 (d, *J* = 8.6 Hz, 1H), 8.35 (d, *J* = 8.6 Hz, 1H), 8.17 (s, 1H), 8.15 (d, *J* = 8.5 Hz, 1H), 7.90 (d, *J* = 8.0 Hz, 1H), 7.83 - 7.76 (m, 2H), 7.67 - 7.60 (m, 2H), 2.53 (s, 3H). <sup>13</sup>C NMR (125 MHz, CDCl<sub>3</sub>) δ 161.6 (s), 148.4 (s), 148.3 (s), 147.2 (s), 146.9 (s), 138.2 (s), 137.7 (s), 136.2 (s), 130.6 (s), 129.8 (s), 129.4 (s), 128.3 (s), 128.2 (s), 127.9 (s), 126.5 (s), 122.5 (s), 118.5 (s), 21.6 (s).

**6-methoxy-2-(quinolin-2-yl)quinazolin-4(3H)-one (3ka)<sup>2</sup>:**

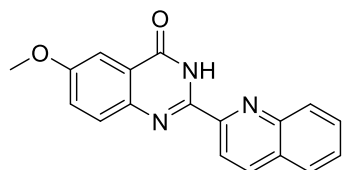

The title compound was prepared according to the general working procedure A and purified by column chromatography (petroleum ether/ethyl acetate = 5/1) to give the product as white solid. 89% yield, 80.9 mg. <sup>1</sup>H NMR (500 MHz, CDCl<sub>3</sub>) δ 11.20 (s, 1H), 8.61 (d, *J* = 8.5 Hz, 1H), 8.32 (d, *J* = 8.5 Hz, 1H), 8.13

(d,  $J = 8.4$  Hz, 1H), 7.87 (d,  $J = 8.1$  Hz, 1H), 7.84 - 7.75 (m, 2H), 7.73 (s, 1H), 7.62 (t,  $J = 7.4$  Hz, 1H), 7.39 (d,  $J = 8.8$  Hz, 1H), 3.95 (s, 3H).  $^{13}\text{C}$  NMR (125 MHz,  $\text{CDCl}_3$ )  $\delta$  161.4 (s), 159.2 (s), 148.2 (s), 147.2 (s), 146.9 (s), 143.6 (s), 137.7 (s), 130.6 (s), 129.9 (s), 129.7 (s), 129.3 (s), 128.2 (s), 127.9 (s), 124.9 (s), 123.7 (s), 118.5 (s), 106.5 (s), 56.0 (s).

**7-dimethoxy-2-(quinolin-2-yl)quinazolin-4(3H)-one (3la):**

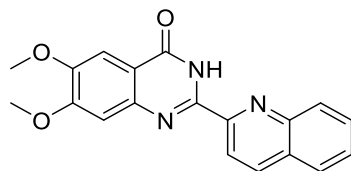

The title compound was prepared according to the general working procedure A and purified by column chromatography (petroleum ether/ethyl acetate = 5/1) to give the product as white solid. 75% yield, 74.9 mg.  $^1\text{H}$  NMR (500 MHz,  $\text{CDCl}_3$ )  $\delta$  11.17 (s, 1H), 8.59 (d,  $J = 8.6$  Hz, 1H), 8.33 (d,  $J = 8.6$  Hz, 1H), 8.14 (d,  $J = 8.5$  Hz, 1H), 7.89 (d,  $J = 8.1$  Hz, 1H), 7.80 (t,  $J = 7.6$  Hz, 1H), 7.70 (s, 1H), 7.64 (t,  $J = 7.4$  Hz, 1H), 7.29 (s, 1H), 4.06 (s, 3H), 4.04 (s, 3H).  $^{13}\text{C}$  NMR (125 MHz,  $\text{CDCl}_3$ )  $\delta$  161.0 (s), 155.2 (s), 149.8 (s), 148.2 (s), 148.1 (s), 147.0 (s), 145.3 (s), 137.7 (s), 130.6 (s), 129.8 (s), 129.3 (s), 128.3 (s), 127.9 (s), 118.3 (s), 116.2 (s), 108.7 (s), 105.9 (s), 56.6 (s), 56.5 (s). HRMS calcd.  $[\text{C}_{19}\text{H}_{15}\text{N}_3\text{O}_3 + \text{H}]^+$ : 334.1192, found: 334.1197.

**3-methyl-2-(quinolin-2-yl)quinazolin-4(3H)-one (3ma)<sup>1</sup>:**

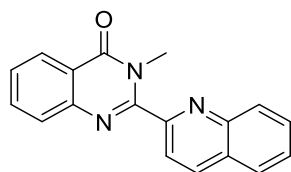

The title compound was prepared according to the general working procedure A and purified by column chromatography (petroleum ether/ethyl acetate = 5/1) to give the product as white solid. 89% yield, 76.6 mg.  $^1\text{H}$  NMR (500 MHz,  $\text{CDCl}_3$ )  $\delta$  8.43 - 8.35 (m, 2H), 8.16 (d,  $J = 8.4$  Hz, 1H), 7.98 - 7.91 (m, 2H), 7.81 (t,  $J = 7.7$  Hz, 1H), 7.78 (d,  $J = 3.8$  Hz, 2H), 7.66 (t,  $J = 7.5$  Hz, 1H), 7.51 - 7.58 (m, 1H), 3.72 (s, 3H).  $^{13}\text{C}$  NMR (125 MHz,  $\text{CDCl}_3$ )  $\delta$  162.8 (s), 154.1 (s), 153.3 (s), 147.3 (s), 147.1 (s), 137.8 (s), 134.4 (s), 130.6 (s), 129.9 (s), 128.1 (s), 128.1 (s), 127.9 (s), 127.8 (s), 127.6 (s), 127.0 (s), 121.4 (s), 121.2 (s), 33.7 (s).

**3-propyl-2-(quinolin-2-yl)quinazolin-4(3H)-one (3na)<sup>2</sup>:**

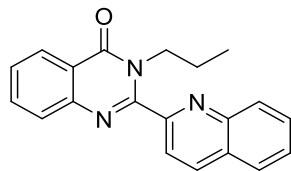

The title compound was prepared according to the general working procedure A and purified by column chromatography (petroleum ether/ethyl acetate = 5/1) to give the product as white solid. 91% yield, 86.0 mg.  $^1\text{H}$  NMR (500 MHz,  $\text{CDCl}_3$ )  $\delta$  8.38 (dd,  $J = 8.1, 4.5$  Hz, 2H), 8.15 (d,  $J = 8.5$  Hz, 1H), 7.93 (d,  $J = 8.4$  Hz, 2H), 7.84 - 7.75 (m, 3H), 7.70 - 7.63 (m, 1H), 7.54 (ddd,  $J = 8.1, 5.7, 2.6$  Hz, 1H), 4.39 - 4.11 (m, 2H), 1.90 - 1.75 (m, 2H), 0.79 (t,  $J = 7.4$  Hz, 3H).  $^{13}\text{C}$  NMR (125 MHz,  $\text{CDCl}_3$ )  $\delta$  162.4 (s), 154.2 (s), 153.4 (s), 147.1 (s), 147.0 (s), 137.7 (s), 134.4 (s), 130.6 (s), 129.9 (s), 128.1 (s), 128.1 (s), 127.9 (s), 127.6 (s), 127.5 (s), 127.1 (s), 121.7 (s), 121.4 (s), 47.2 (s), 22.5 (s), 11.4 (s).



**3-isopropyl-2-(quinolin-2-yl)quinazolin-4(3H)-one (30a)<sup>2</sup>:**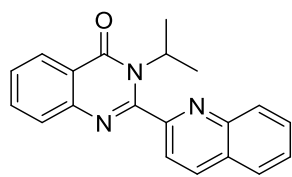

The title compound was prepared according to the general working procedure A and purified by column chromatography (petroleum ether/ethyl acetate = 5/1) to give the product as yellow solid. 56% yield, 52.9 mg. <sup>1</sup>H NMR (500 MHz, CDCl<sub>3</sub>) δ 8.38 (d, *J* = 8.4 Hz, 1H), 8.34 (d, *J* = 8.0 Hz, 1H), 8.16 (d, *J* = 8.4 Hz, 1H), 7.92 (d, *J* = 8.2 Hz, 1H), 7.85 (d, *J* = 8.4 Hz, 1H), 7.81 (t, *J* = 7.7 Hz, 1H), 7.78 - 7.72 (m, 2H), 7.65 (t, *J* = 7.5 Hz, 1H), 7.52 (t, *J* = 7.1 Hz, 1H), 4.43 (dt, *J* = 13.5, 6.7 Hz, 1H), 1.67 (d, *J* = 6.7 Hz, 6H). <sup>13</sup>C NMR (126 MHz, CDCl<sub>3</sub>) δ 162.6 (s), 155.0 (s), 153.8 (s), 147.3 (s), 146.5 (s), 137.8 (s), 134.3 (s), 130.6 (s), 130.0 (s), 128.0 (s), 128.0 (s), 127.5 (s), 127.3 (s), 126.7 (s), 122.5 (s), 120.9 (s), 54.6 (s), 20.0 (s).

**2-(6-fluoroquinolin-2-yl)quinazolin-4(3H)-one (3ab)<sup>3</sup>:**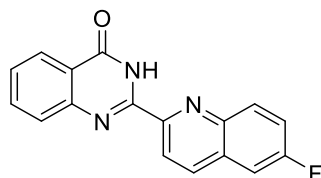

The title compound was prepared according to the general working procedure A and purified by column chromatography (petroleum ether/ethyl acetate = 5/1) to give the product as white solid. 94% yield, 82.0 mg. <sup>1</sup>H NMR (500 MHz, CDCl<sub>3</sub>) δ 11.08 (s, 1H), 8.64 (d, *J* = 8.4 Hz, 1H), 8.35 (d, *J* = 7.6 Hz, 1H), 8.28 (d, *J* = 8.5 Hz, 1H), 8.18 - 8.08 (m, 1H), 7.85 (d, *J* = 7.8 Hz, 1H), 7.80 (t, *J* = 7.3 Hz, 1H), 7.54 (dd, *J* = 16.7, 8.4 Hz, 2H), 7.49 (d, *J* = 8.3 Hz, 1H). <sup>13</sup>C NMR (125 MHz, CDCl<sub>3</sub>) δ 161.6 (d, *J* = 250 Hz), 161.5 (s), 149.1 (s), 148.8 (s), 147.8 (s), 144.0 (s), 137.1 (d, *J* = 5.5 Hz), 134.8 (s), 132.4 (d, *J* = 9.4 Hz), 130.2 (d, *J* = 10.3 Hz), 128.4 (s), 127.8 (s), 126.9 (s), 121.0 (d, *J* = 26.3 Hz), 120.9 (s), 119.4 (s), 111.1 (d, *J* = 21.3 Hz).

**2-(6-chloroquinolin-2-yl)quinazolin-4(3H)-one (3ac)<sup>3</sup>:**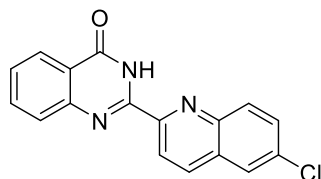

The title compound was prepared according to the general working procedure A and purified by column chromatography (petroleum ether/ethyl acetate = 5/1) to give the product as white solid. 75% yield, 69.1 mg. <sup>1</sup>H NMR (500 MHz, CDCl<sub>3</sub>) δ 11.09 (s, 1H), 8.67 (d, *J* = 8.6 Hz, 1H), 8.36 (dd, *J* = 7.9, 1.2 Hz, 1H), 8.26 (d, *J* = 8.6 Hz, 1H), 8.08 (d, *J* = 9.0 Hz, 1H), 7.91 - 7.85 (m, 2H), 7.84 - 7.79 (m, 1H), 7.72 (dd, *J* = 9.0, 2.3 Hz, 1H), 7.58 - 7.52 (m, 1H). <sup>13</sup>C NMR (125 MHz, CDCl<sub>3</sub>) δ 161.4 (s), 149.1 (s), 148.7 (s), 148.5 (s), 145.3 (s), 136.8 (s), 134.8 (s), 134.4 (s), 131.7 (s), 131.3 (s), 129.9 (s), 128.4 (s), 127.9 (s), 127.0 (s), 126.6 (s), 122.8 (s), 119.6 (s).

**2-(7-chloroquinolin-2-yl)quinazolin-4(3H)-one (3ad)<sup>2</sup>:**

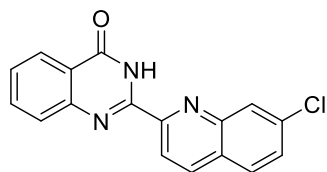

The title compound was prepared according to the general working procedure A and purified by column chromatography (petroleum ether/ethyl acetate = 5/1) to give the product as white solid. 80% yield, 73.7mg.  $^1\text{H NMR}$  (500 MHz,  $\text{CDCl}_3$ )  $\delta$  11.11 (s, 1H), 8.68 (d,  $J = 8.4$  Hz, 1H), 8.37 (dd,  $J = 14.5, 8.2$  Hz, 2H), 8.15 (s, 1H), 7.89 (d,  $J = 8.0$  Hz, 1H), 7.83 (dd,  $J = 16.0, 8.2$  Hz, 2H), 7.60 (d,  $J = 8.6$  Hz, 1H), 7.56 (t,  $J = 7.4$  Hz, 1H).  $^{13}\text{C NMR}$  (125 MHz,  $\text{CDCl}_3$ )  $\delta$  161.4 (s), 149.2 (s), 149.0 (s), 148.7 (s), 147.3 (s), 137.7 (s), 136.7 (s), 134.9 (s), 129.5 (s), 129.1 (s), 128.7 (s), 128.4 (s), 128.0 (s), 127.8 (s), 127.0 (s), 122.8 (s), 118.9 (s).

**2-(6-bromoquinolin-2-yl)quinazolin-4(3H)-one (3ae)<sup>2</sup>:**

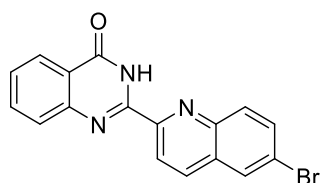

The title compound was prepared according to the general working procedure A and purified by column chromatography (petroleum ether/ethyl acetate = 5/1) to give the product as yellow solid. 85% yield, 89.5 mg.  $^1\text{H NMR}$  (500 MHz,  $\text{CDCl}_3$ )  $\delta$  11.08 (s, 1H), 8.67 (d,  $J = 8.6$  Hz, 1H), 8.36 (d,  $J = 7.9$  Hz, 1H), 8.25 (d,  $J = 8.6$  Hz, 1H), 8.05 (d,  $J = 2.0$  Hz, 1H), 8.01 (d,  $J = 8.9$  Hz, 1H), 7.89 - 7.84 (m, 2H), 7.83 - 7.79 (m, 1H), 7.55 (t,  $J = 7.5$  Hz, 1H).  $^{13}\text{C NMR}$  (125 MHz,  $\text{CDCl}_3$ )  $\delta$  161.4 (s), 149.1 (s), 148.7 (s), 148.6 (s), 145.5 (s), 136.7 (s), 134.8 (s), 134.2 (s), 131.4 (s), 130.4 (s), 130.0 (s), 128.4 (s), 127.9 (s), 127.0 (s), 122.8 (s), 122.6 (s), 119.6 (s).

**2-(8-bromoquinolin-2-yl)quinazolin-4(3H)-one (3af):**

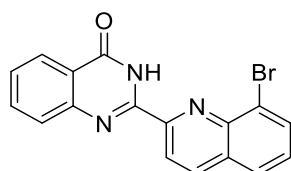

The title compound was prepared according to the general working procedure A and purified by column chromatography (petroleum ether/ethyl acetate = 5/1) to give the product as yellow solid. 78% yield, 82.1 mg.  $^1\text{H NMR}$  (500 MHz,  $\text{CDCl}_3$ )  $\delta$  11.07 (s, 1H), 8.60 (d,  $J = 8.5$  Hz, 1H), 8.35 (d,  $J = 8.5$  Hz, 1H), 8.18 (d,  $J = 8.4$  Hz, 1H), 7.90 (d,  $J = 8.1$  Hz, 1H), 7.85 - 7.77 (m, 2H), 7.73 (d,  $J = 7.6$  Hz, 1H), 7.65 (t,  $J = 7.4$  Hz, 1H), 7.55 (t,  $J = 7.9$  Hz, 1H).  $^{13}\text{C NMR}$  (125 MHz,  $\text{CDCl}_3$ )  $\delta$  159.7 (s), 151.4 (s), 149.4 (s), 147.5 (s), 146.9 (s), 137.9 (s), 134.3 (s), 134.1 (s), 130.7 (s), 129.9 (s), 129.5 (s), 128.6 (s), 128.3 (s), 127.9 (s), 121.8 (s), 121.0 (s), 118.5 (s). HRMS calcd.  $[\text{C}_{17}\text{H}_{10}\text{BrN}_3\text{O} + \text{H}]^+$ : 352.0085, found: 352.0085.

**2-(7-(trifluoromethyl)quinolin-2-yl)quinazolin-4(3H)-one (3ag):**

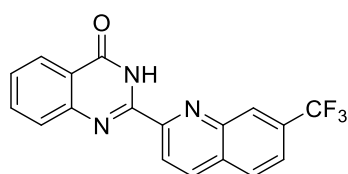

The title compound was prepared according to the general working procedure A and purified by column chromatography (petroleum ether/ethyl acetate = 5/1) to give the product as yellow solid. 82% yield, 83.9 mg. <sup>1</sup>H NMR (500 MHz, CDCl<sub>3</sub>) δ 11.13 (s, 1H), 8.88 (d, *J* = 8.6 Hz, 1H), 8.50 (s, 1H), 8.46 (d, *J* = 8.6 Hz, 1H), 8.40 (d, *J* = 7.8 Hz, 1H), 8.06 (d, *J* = 8.5 Hz, 1H), 7.96 (d, *J* = 8.1 Hz, 1H), 7.89 - 7.81 (m, 2H), 7.59 (t, *J* = 7.4 Hz, 1H). <sup>13</sup>C NMR (125 MHz, CDCl<sub>3</sub>) δ 161.3 (s), 149.5 (s), 148.7 (s), 148.6 (s), 146.0 (s), 137.9 (s), 135.0 (s), 132.6 (q, *J* = 32.6 Hz), 130.8 (s), 130.4 (s), 128.3 (s), 128.2 (q, *J* = 271.3 Hz), 127.6 (q, *J* = 3.8 Hz), 127.1 (s), 124.2 (s), 122.8 (s), 122.7 (s), 120.8 (s), 112.9 (s). HRMS calcd. [C<sub>18</sub>H<sub>10</sub>F<sub>3</sub>N<sub>3</sub>O + H]<sup>+</sup>: 342.0854, found: 342.0853.

**2-(6-methoxyquinolin-2-yl)quinazolin-4(3H)-one (3ah)<sup>1</sup>:**

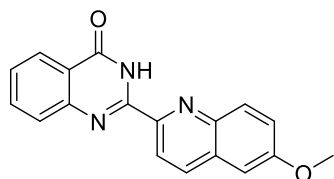

The title compound was prepared according to the general working procedure A and purified by column chromatography (petroleum ether/ethyl acetate = 5/1) to give the product as white solid. 85% yield, 77.3 mg. <sup>1</sup>H NMR (500 MHz, CDCl<sub>3</sub>) δ 11.16 (s, 1H), 8.62 (d, *J* = 8.6 Hz, 1H), 8.37 (d, *J* = 7.9 Hz, 1H), 8.23 (d, *J* = 8.6 Hz, 1H), 8.03 (d, *J* = 9.2 Hz, 1H), 7.88 (d, *J* = 8.1 Hz, 1H), 7.84 - 7.78 (m, 1H), 7.53 (t, *J* = 7.5 Hz, 1H), 7.44 (dd, *J* = 9.2, 2.7 Hz, 1H), 7.13 (d, *J* = 2.6 Hz, 1H), 3.97 (s, 3H). <sup>13</sup>C NMR (125 MHz, CDCl<sub>3</sub>) δ 161.6 (s), 159.4 (s), 149.4 (s), 149.2 (s), 145.6 (s), 143.0 (s), 136.3 (s), 134.88 (s), 131.3 (s), 130.9 (s), 128.1 (s), 127.5 (s), 126.9 (s), 123.7 (s), 122.6 (s), 119.1 (s), 105.2 (s), 55.9 (s).

**2-(6-ethoxyquinolin-2-yl)quinazolin-4(3H)-one (3ai):**

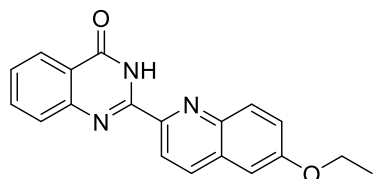

The title compound was prepared according to the general working procedure A and purified by column chromatography (petroleum ether/ethyl acetate = 5/1) to give the product as white solid. 88% yield, 83.7 mg. <sup>1</sup>H NMR (500 MHz, CDCl<sub>3</sub>) δ 11.11 (s, 1H), 8.55 (d, *J* = 8.5 Hz, 1H), 8.34 (d, *J* = 7.8 Hz, 1H), 8.16 (d, *J* = 8.6 Hz, 1H), 7.98 (d, *J* = 9.2 Hz, 1H), 7.85 (d, *J* = 8.1 Hz, 1H), 7.78 (t, *J* = 7.5 Hz, 1H), 7.50 (t, *J* = 7.4 Hz, 1H), 7.39 (dd, *J* = 9.1, 2.3 Hz, 1H), 7.06 (d, *J* = 2.2 Hz, 1H), 4.14 (q, *J* = 6.9 Hz, 2H), 1.49 (t, *J* = 6.9 Hz, 3H). <sup>13</sup>C NMR (125 MHz, CDCl<sub>3</sub>) δ 161.5 (s), 158.7 (s), 149.3 (s), 147.2 (s), 145.4 (s), 142.8 (s), 136.1 (s), 134.7 (s), 131.1 (s), 130.8 (s), 128.1 (s), 127.4 (s), 126.9 (s), 123.9 (s), 122.6 (s), 118.9 (s), 105.7 (s), 64.1 (s), 14.8 (s). HRMS calcd. [C<sub>19</sub>H<sub>15</sub>N<sub>3</sub>O<sub>2</sub> + H]<sup>+</sup>: 318.1243, found: 318.1241.

**2-(6-methylquinolin-2-yl)quinazolin-4(3H)-one (3aj)<sup>2</sup>:**

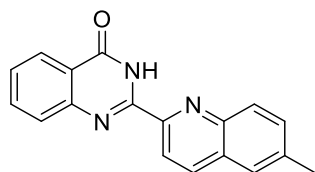

The title compound was prepared according to the general working procedure A and purified by column chromatography (petroleum ether/ethyl acetate = 5/1) to give the product as white solid. 74% yield, 63.7 mg. <sup>1</sup>H NMR (500 MHz, CDCl<sub>3</sub>) δ 11.19 (s, 1H), 8.63 (d, *J* = 8.5 Hz, 1H), 8.37 (d, *J* = 7.9 Hz, 1H),

8.26 (d,  $J = 8.6$  Hz, 1H), 8.04 (d,  $J = 8.5$  Hz, 1H), 7.90 (d,  $J = 8.1$  Hz, 1H), 7.81 (t,  $J = 7.6$  Hz, 1H), 7.68 - 7.60 (m, 2H), 7.54 (t,  $J = 7.5$  Hz, 1H), 2.58 (s, 3H).  $^{13}\text{C}$  NMR (125 MHz,  $\text{CDCl}_3$ )  $\delta$  161.5 (s), 149.3 (s), 149.1 (s), 147.1 (s), 145.5 (s), 138.8 (s), 137.1 (s), 134.8 (s), 133.0 (s), 129.5 (s), 129.5 (s), 128.2 (s), 127.6 (s), 126.9 (s), 126.8 (s), 122.7 (s), 118.7 (s), 22.0 (s).

**2-(8-methylquinolin-2-yl)quinazolin-4(3H)-one (3ak):**

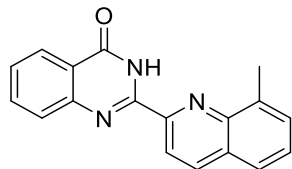

The title compound was prepared according to the general working procedure A and purified by column chromatography (petroleum ether/ethyl acetate = 5/1) to give the product as yellow solid. 68% yield, 58.6 mg.  $^1\text{H}$  NMR (500 MHz,  $\text{CDCl}_3$ )  $\delta$  11.02 (s, 1H), 8.65 (d,  $J = 8.5$  Hz, 1H), 8.37 (d,  $J = 7.8$  Hz, 1H), 8.31 (d,  $J = 8.5$  Hz, 1H), 7.88 (d,  $J = 8.0$  Hz, 1H), 7.80 (t,  $J = 7.5$  Hz, 1H), 7.72 (d,  $J = 8.0$  Hz, 1H), 7.62 (d,  $J = 6.8$  Hz, 1H), 7.52 (dd,  $J = 17.1, 7.9$  Hz, 2H), 2.89 (s, 3H).  $^{13}\text{C}$  NMR (125 MHz,  $\text{CDCl}_3$ )  $\delta$  161.4 (s), 149.3 (s), 149.1 (s), 146.9 (s), 145.9 (s), 138.1 (s), 137.7 (s), 134.7 (s), 130.8 (s), 129.5 (s), 128.3 (s), 128.3 (s), 127.6 (s), 127.0 (s), 125.9 (s), 122.7 (s), 118.4 (s), 18.3 (s). HRMS calcd.  $[\text{C}_{18}\text{H}_{13}\text{N}_3\text{O} + \text{H}]^+$ : 288.1137, found: 288.1141.

**2-(6-(tert-butyl)quinolin-2-yl)quinazolin-4(3H)-one (3al):**

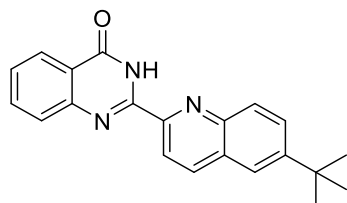

The title compound was prepared according to the general working procedure A and purified by column chromatography (petroleum ether/ethyl acetate = 5/1) to give the product as white solid. 91% yield, 89.8 mg.  $^1\text{H}$  NMR (500 MHz,  $\text{CDCl}_3$ )  $\delta$  11.23 (s, 1H), 8.62 (d,  $J = 8.5$  Hz, 1H), 8.36 (d,  $J = 7.8$  Hz, 1H), 8.30 (d,  $J = 8.5$  Hz, 1H), 8.08 (d,  $J = 8.9$  Hz, 1H), 7.92 - 7.85 (m, 2H), 7.83 - 7.75 (m, 2H), 7.52 (t,  $J = 7.4$  Hz, 1H), 1.45 (s, 9H).  $^{13}\text{C}$  NMR (125 MHz,  $\text{CDCl}_3$ )  $\delta$  161.6 (s), 151.6 (s), 149.3 (s), 149.2 (s), 147.4 (s), 145.5 (s), 137.7 (s), 134.7 (s), 129.7 (s), 129.3 (s), 129.3 (s), 128.2 (s), 127.6 (s), 126.9 (s), 122.8 (s), 122.7 (s), 118.5 (s), 35.3 (s), 31.2 (s). HRMS calcd.  $[\text{C}_{21}\text{H}_{19}\text{N}_3\text{O} + \text{H}]^+$ : 330.1606, found: 330.1606.

**ethyl 2-(4-oxo-3,4-dihydroquinazolin-2-yl)-4-phenylquinoline-3-carboxylate (3an):**

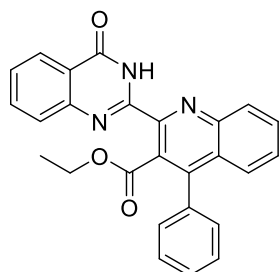

The title compound was prepared according to the general working procedure A and purified by column chromatography (petroleum ether/ethyl acetate = 5/1) to give the product as yellow solid. 68% yield, 85.9 mg.  $^1\text{H}$  NMR (500 MHz,  $\text{CDCl}_3$ )  $\delta$  11.19 (s, 1H), 8.38 (d,  $J = 7.8$  Hz, 1H), 8.23 (d,  $J = 8.4$  Hz, 1H), 7.85 (t,  $J = 7.4$  Hz, 1H), 7.77 (t,  $J = 7.6$  Hz, 1H), 7.69 (d,  $J = 8.0$  Hz, 1H), 7.64 - 7.50 (m, 6H), 7.44 -

7.39 (m, 2H), 4.26 (q,  $J = 7.1$  Hz, 2H), 1.06 (t,  $J = 7.1$  Hz, 3H).  $^{13}\text{C}$  NMR (125 MHz,  $\text{CDCl}_3$ )  $\delta$  167.3 (s), 161.5 (s), 148.6 (s), 148.5 (s), 148.0 (s), 146.4 (s), 143.6 (s), 134.7 (s), 134.5 (s), 131.3 (s), 129.9 (s), 129.7 (s), 129.1 (s), 129.0 (s), 128.3 (s), 128.3 (s), 128.0 (s), 127.9 (s), 126.9 (s), 126.9 (s), 126.4 (s), 122.8 (s), 61.5 (s), 13.9 (s). HRMS calcd.  $[\text{C}_{26}\text{H}_{19}\text{N}_3\text{O}_3 + \text{H}]^+$ : 422.1505, found: 422.1513.

**ethyl 2-(4-oxo-3,4-dihydroquinazolin-2-yl)quinoline-3-carboxylate (3ao)<sup>4</sup>:**

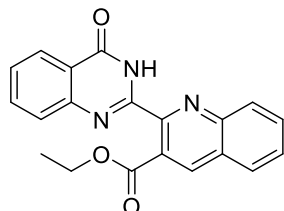

The title compound was prepared according to the general working procedure A and purified by column chromatography (petroleum ether/ethyl acetate = 5/1) to give the product as yellow solid. 83% yield, 85.9 mg.  $^1\text{H}$  NMR (500 MHz,  $\text{CDCl}_3$ )  $\delta$  11.03 (s, 1H), 8.45 - 8.33 (m, 2H), 8.16 (d,  $J = 8.3$  Hz, 1H), 7.91 (d,  $J = 8.0$  Hz, 1H), 7.84 (t,  $J = 7.5$  Hz, 1H), 7.81 - 7.77 (m, 1H), 7.74 (d,  $J = 7.8$  Hz, 1H), 7.67 (t,  $J = 7.3$  Hz, 1H), 7.54 (t,  $J = 7.1$  Hz, 1H), 4.53 (q,  $J = 6.7$  Hz, 2H), 1.35 (t,  $J = 7.0$  Hz, 3H).  $^{13}\text{C}$  NMR (125 MHz,  $\text{CDCl}_3$ )  $\delta$  168.5 (s), 161.4 (s), 148.4 (s), 148.1 (s), 146.7 (s), 145.0 (s), 137.3 (s), 134.8 (s), 131.9 (s), 129.7 (s), 129.3 (s), 128.1 (s), 128.1 (s), 128.0 (s), 127.8 (s), 127.1 (s), 127.0 (s), 122.6 (s), 62.3 (s), 14.3 (s).

**2-(quinolin-4-yl)quinazolin-4(3H)-one (3ap)<sup>3</sup>:**

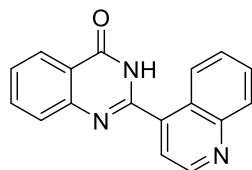

The title compound was prepared according to the general working procedure A and purified by column chromatography (petroleum ether/ethyl acetate = 5/1) to give the product as white solid. 65% yield, 53.5 mg.  $^1\text{H}$  NMR (500 MHz,  $\text{DMSO}$ )  $\delta$  12.84 (s, 1H), 9.08 (d,  $J = 4.3$  Hz, 1H), 8.29 - 8.19 (m, 2H), 8.16 (d,  $J = 5.0$  Hz, 1H), 7.92 - 7.84 (m, 2H), 7.81 (d,  $J = 4.3$  Hz, 1H), 7.77 (d,  $J = 8.0$  Hz, 1H), 7.68 (t,  $J = 7.8$  Hz, 1H), 7.62 (t,  $J = 7.3$  Hz, 1H).  $^{13}\text{C}$  NMR (125 MHz,  $\text{DMSO}$ )  $\delta$  161.9 (s), 151.9 (s), 150.3 (s), 148.1 (s), 145.7 (s), 139.4 (s), 134.9 (s), 134.6 (s), 130.2 (s), 129.6 (s), 127.9 (s), 127.5 (s), 127.0 (s), 126.1 (s), 125.8 (s), 124.9 (s), 121.7 (s).

**2-(isoquinolin-1-yl)quinazolin-4(3H)-one (3aq)<sup>2</sup>:**

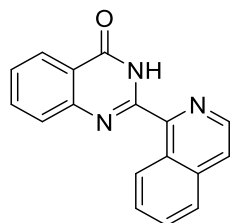

The title compound was prepared according to the general working procedure A and purified by column chromatography (petroleum ether/ethyl acetate = 5/1) to give the product as white solid. 84% yield, 69.0 mg.  $^1\text{H}$  NMR (500 MHz,  $\text{CDCl}_3$ )  $\delta$  11.36 (s, 1H), 10.15 (d,  $J = 7.6$  Hz, 1H), 8.58 (d,  $J = 4.9$  Hz, 1H), 8.38 (d,  $J = 7.7$  Hz, 1H), 7.96 (d,  $J = 8.0$  Hz, 1H), 7.90 (d,  $J = 5.2$  Hz, 1H), 7.87 - 7.81 (m, 2H), 7.80 - 7.76 (m, 2H), 7.55 (t,  $J = 7.3$  Hz, 1H).  $^{13}\text{C}$  NMR (125 MHz,  $\text{CDCl}_3$ )  $\delta$  161.6 (s), 150.3 (s), 149.0 (s),

145.8 (s), 140.6 (s), 137.8 (s), 134.6 (s), 130.8 (s), 129.2 (s), 128.6 (s), 128.3 (s), 127.8 (s), 127.4 (s), 127.4 (s), 126.7 (s), 124.8 (s), 122.5 (s).

**2-(pyridin-2-yl)quinazolin-4(3H)-one (3ar)<sup>1</sup>:**

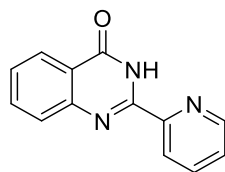

The title compound was prepared according to the general working procedure B and purified by column chromatography (petroleum ether/ethyl acetate = 8/1) to give the product as white solid. 73% yield, 48.8 mg. <sup>1</sup>H NMR (500 MHz, CDCl<sub>3</sub>) δ 10.98 (s, 1H), 8.67 (d, *J* = 4.4 Hz, 1H), 8.63 (d, *J* = 7.9 Hz, 1H), 8.35 (d, *J* = 7.9 Hz, 1H), 7.93 (t, *J* = 7.7 Hz, 1H), 7.87 (d, *J* = 8.1 Hz, 1H), 7.80 (t, *J* = 7.6 Hz, 1H), 7.55 - 7.45 (m, 2H). <sup>13</sup>C NMR (125 MHz, CDCl<sub>3</sub>) δ 161.5 (s), 149.1 (s), 149.1 (s), 148.9 (s), 148.4 (s), 137.7 (s), 134.8 (s), 128.1 (s), 127.5 (s), 126.9 (s), 126.5 (s), 122.6 (s), 122.2 (s).

**2-(5-methylpyridin-2-yl)quinazolin-4(3H)-one (3as):**

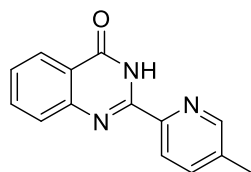

The title compound was prepared according to the general working procedure B and purified by column chromatography (petroleum ether/ethyl acetate = 8/1) to give the product as white solid. 63% yield, 44.8 mg. <sup>1</sup>H NMR (500 MHz, CDCl<sub>3</sub>) δ 10.94 (s, 1H), 8.48 (s, 1H), 8.46 (d, *J* = 8.1 Hz, 1H), 8.34 (d, *J* = 7.9 Hz, 1H), 7.80 (t, *J* = 8.9 Hz, 2H), 7.71 (d, *J* = 7.2 Hz, 1H), 7.50 (t, *J* = 7.2 Hz, 1H), 2.44 (s, 3H). <sup>13</sup>C NMR (125 MHz, CDCl<sub>3</sub>) δ 161.6 (s), 149.3 (s), 149.3 (s), 146.0 (s), 138.1 (s), 136.8 (s), 135.8 (s), 134.7 (s), 128.0 (s), 127.2 (s), 126.9 (s), 122.5 (s), 121.7 (s), 18.8 (s). HRMS calcd. [C<sub>14</sub>H<sub>11</sub>N<sub>3</sub>O + H]<sup>+</sup>: 238.0980, found: 238.0984.

**2-(6-methylpyridin-2-yl)quinazolin-4(3H)-one (3at)<sup>1</sup>:**

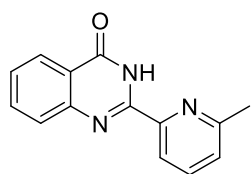

The title compound was prepared according to the general working procedure B and purified by column chromatography (petroleum ether/ethyl acetate = 8/1) to give the product as white solid. 71% yield, 50.5 mg. <sup>1</sup>H NMR (500 MHz, CDCl<sub>3</sub>) δ 11.08 (s, 1H), 8.40 (d, *J* = 7.7 Hz, 1H), 8.34 (d, *J* = 7.8 Hz, 1H), 7.84 (d, *J* = 8.0 Hz, 1H), 7.81 - 7.75 (m, 2H), 7.51 (t, *J* = 7.4 Hz, 1H), 7.32 (d, *J* = 7.6 Hz, 1H), 2.63 (s, 3H). <sup>13</sup>C NMR (125 MHz, CDCl<sub>3</sub>) δ 161.6 (s), 158.1 (s), 149.3 (s), 149.2 (s), 147.5 (s), 137.9 (s), 134.7 (s), 128.0 (s), 127.4 (s), 126.9 (s), 126.2 (s), 122.5 (s), 119.3 (s), 24.4 (s).

**6-fluoro-2-(pyridin-2-yl)quinazolin-4(3H)-one (3br):**

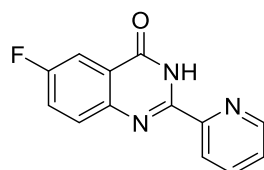

The title compound was prepared according to the general working procedure B and purified by column chromatography (petroleum ether/ethyl acetate = 8/1) to give the product as white solid. 66% yield, 47.7 mg. <sup>1</sup>H NMR (500 MHz, CDCl<sub>3</sub>) δ 10.99 (s, 1H), 8.67 (d, *J* = 4.4 Hz, 1H), 8.56 (d, *J* = 7.9 Hz, 1H), 7.97 (dd, *J* = 8.3, 2.8 Hz, 1H), 7.92 (t, *J* = 7.7 Hz, 1H), 7.84 (dd, *J* = 8.9, 4.9 Hz, 1H), 7.58 - 7.44 (m, 2H). <sup>13</sup>C NMR (125 MHz, CDCl<sub>3</sub>) δ 161.3 (d, *J* = 247.5 Hz), 160.8 (s), 148.9 (s), 148.5 (s), 148.2 (s), 145.8 (s), 137.7 (s), 130.5 (d, *J* = 8.2 Hz), 126.5 (s), 123.9 (d, *J* = 8.6 Hz), 123.2 (d, *J* = 23.8 Hz), 122.1 (s), 112.0 (d, *J* = 23.8 Hz). HRMS calcd. [C<sub>13</sub>H<sub>8</sub>FN<sub>3</sub>O + H]<sup>+</sup>: 242.0730, found: 242.0735.

**5-bromo-2-(pyridin-2-yl) quinazolin-4(3H)-one (3hr):**

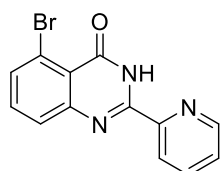

The title compound was prepared according to the general working procedure B and purified by column chromatography (petroleum ether/ethyl acetate = 8/1) to give the product as white solid. 41% yield, 37.0 mg. <sup>1</sup>H NMR (500 MHz, CDCl<sub>3</sub>) δ 10.84 (s, 1H), 8.67 (d, *J* = 4.3 Hz, 1H), 8.54 (d, *J* = 7.9 Hz, 1H), 7.91 (t, *J* = 7.7 Hz, 1H), 7.76 (d, *J* = 8.1 Hz, 1H), 7.71 (d, *J* = 7.7 Hz, 1H), 7.55 - 7.46 (m, 2H). <sup>13</sup>C NMR (125 MHz, CDCl<sub>3</sub>) δ 159.7 (s), 151.5 (s), 149.4 (s), 149.0 (s), 147.9 (s), 137.7 (s), 134.3 (s), 133.9 (s), 128.1 (s), 126.7 (s), 122.2 (s), 121.8 (s), 120.8 (s). HRMS calcd. [C<sub>13</sub>H<sub>8</sub>BrN<sub>3</sub>O + H]<sup>+</sup>: 301.9929, found: 301.9926.

**6-methyl-2-(pyridin-2-yl) quinazolin-4(3H)-one :**

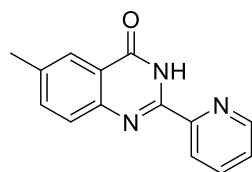

The title compound was prepared according to the general working procedure B and purified by column chromatography (petroleum ether/ethyl acetate = 8/1) to give the product as white solid. 68% yield, 48.3 mg. <sup>1</sup>H NMR (500 MHz, CDCl<sub>3</sub>) δ 10.91 (s, 1H), 8.67 - 8.57 (m, 1H), 8.52 (d, *J* = 7.7 Hz, 1H), 8.11 (s, 1H), 7.87 (t, *J* = 7.5 Hz, 1H), 7.69 (d, *J* = 8.2 Hz, 1H), 7.57 (d, *J* = 8.0 Hz, 1H), 7.48 - 7.39 (m, 1H), 2.48 (s, 3H). <sup>13</sup>C NMR (125 MHz, CDCl<sub>3</sub>) δ 161.5 (s), 148.8 (s), 148.6 (s), 148.3 (s), 147.2 (s), 137.7 (s), 137.5 (s), 136.1 (s), 127.9 (s), 126.3 (s), 126.1 (s), 122.2 (s), 121.9 (s), 21.5 (s). HRMS calcd. [C<sub>14</sub>H<sub>11</sub>N<sub>3</sub>O + H]<sup>+</sup>: 238.0980, found: 238.0988.

**6-methoxy-2-(pyridin-2-yl) quinazolin-4(3H)-one (3kr):**

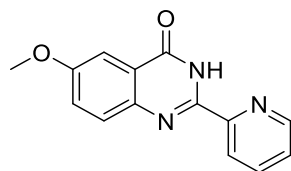

The title compound was prepared according to the general working procedure B and purified by column chromatography (petroleum ether/ethyl acetate = 5/1) to give the product as white solid. 56% yield, 42.5 mg. <sup>1</sup>H NMR (500 MHz, CDCl<sub>3</sub>) δ 10.91 (s, 1H), 8.58 (d, *J* = 4.6 Hz, 1H), 8.46 (d, *J* = 7.9 Hz, 1H), 7.83 (t, *J* = 7.7 Hz, 1H), 7.69 (d, *J* = 8.9 Hz, 1H), 7.66 (d, *J* = 2.8 Hz, 1H), 7.42 - 7.35 (m, 1H), 7.32 (dd, *J* = 8.9, 2.8 Hz, 1H), 3.89 (s, 3H). <sup>13</sup>C NMR (125 MHz, CDCl<sub>3</sub>) δ 161.3 (s), 158.9 (s), 148.7 (s), 148.6

(s), 146.9 (s), 143.6 (s), 137.5 (s), 129.6 (s), 125.9 (s), 124.8 (s), 123.3 (s), 121.6 (s), 106.3 (s), 55.9 (s).

HRMS calcd.  $[\text{C}_{14}\text{H}_{11}\text{N}_3\text{O}_2 + \text{H}]^+$ : 254.0930, found: 254.0928.

**3-methyl-2-(pyridin-2-yl)quinazolin-4(3H)-one (3mr)<sup>1</sup>:**

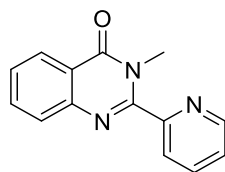

The title compound was prepared according to the general working procedure B and purified by column chromatography (petroleum ether/ethyl acetate = 10/1) to give the product as white solid. 74% yield, 52.6 mg. <sup>1</sup>H NMR (500 MHz, CDCl<sub>3</sub>) δ 8.71 (d, *J* = 4.4 Hz, 1H), 8.33 (d, *J* = 8.0 Hz, 1H), 7.90 (t, *J* = 7.3 Hz, 1H), 7.83 (d, *J* = 7.7 Hz, 1H), 7.74 (d, *J* = 3.8 Hz, 2H), 7.50 (dt, *J* = 8.1, 4.1 Hz, 1H), 7.47 - 7.40 (m, 1H), 3.59 (s, 3H). <sup>13</sup>C NMR (125 MHz, CDCl<sub>3</sub>) δ 162.6 (s), 154.0 (s), 153.5 (s), 149.0 (s), 147.0 (s), 137.6 (s), 134.4 (s), 127.5 (s), 127.5 (s), 126.9 (s), 124.9 (s), 124.5 (s), 121.0 (s), 33.6 (s).



## References

- (1) Li, Q.; Huang, Y.; Chen, T. Q.; Zhou, Y. B.; Xu, Q.; Yin, S. F.; Han, L. B. *Org. Lett.* 2014, 16, 3672-3675.
- (2) Liu, H. H.; Zhai, T. R.; Ding, S. T.; Hou, Y. L.; Zhang, X. Y.; Feng, L.; Ma, C. *Org. Chem. Front.* 2016, 3, 1096-1099.
- (3) Yang, L.; Shi, X.; Hu, B. Q.; Wang, L. X. *Asian J. Org. Chem.* 2016, 5, 494-498.
- (4) Lingaiah, N.; Hanmant, K. G., Rajashaker B. *Synlett.* 2012, 23, 12, 1775-1778.

# Copies of product NMR spectra

## 2-(quinolin-2-yl)quinazolin-4(3H)-one (3aa):

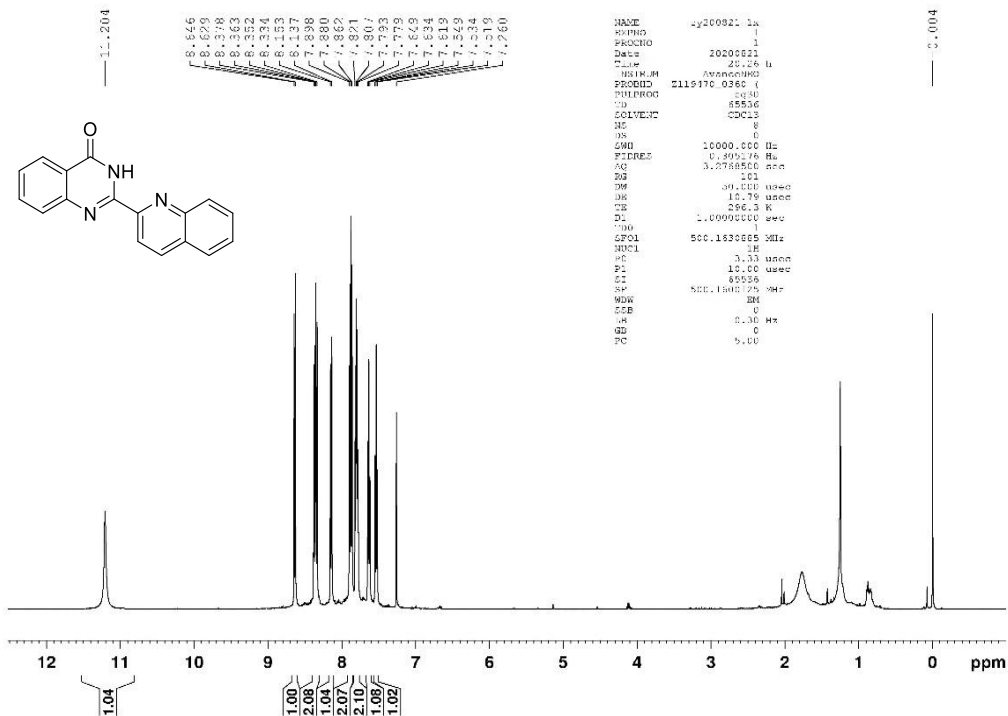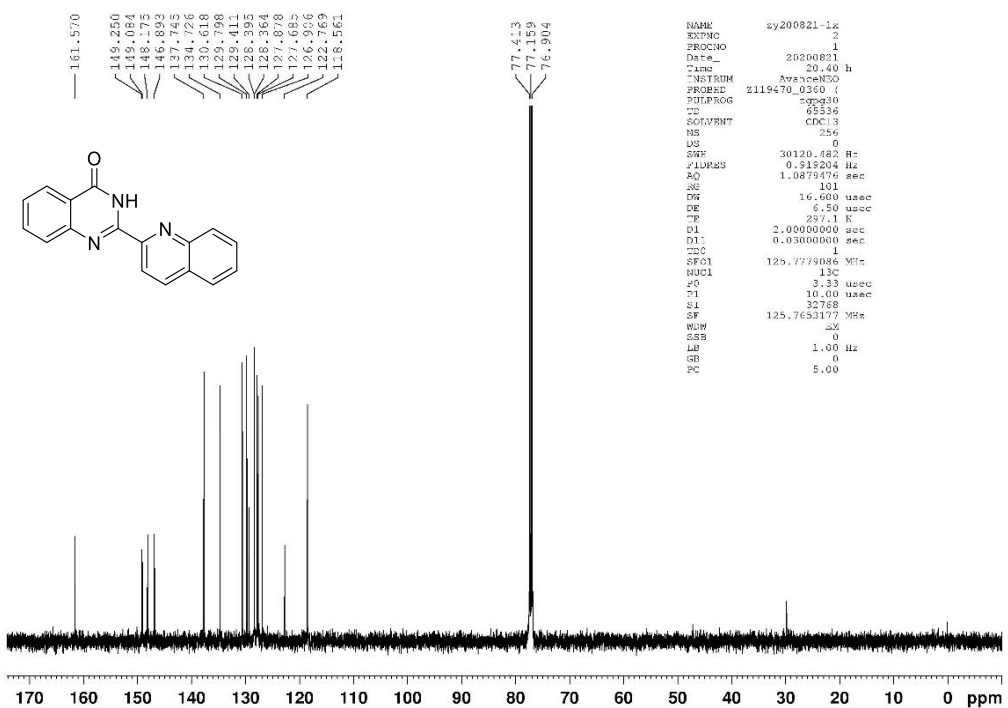

**6-Fluoro-2-(quinolin-2-yl)quinazolin-4(3H)-one (3ba):**

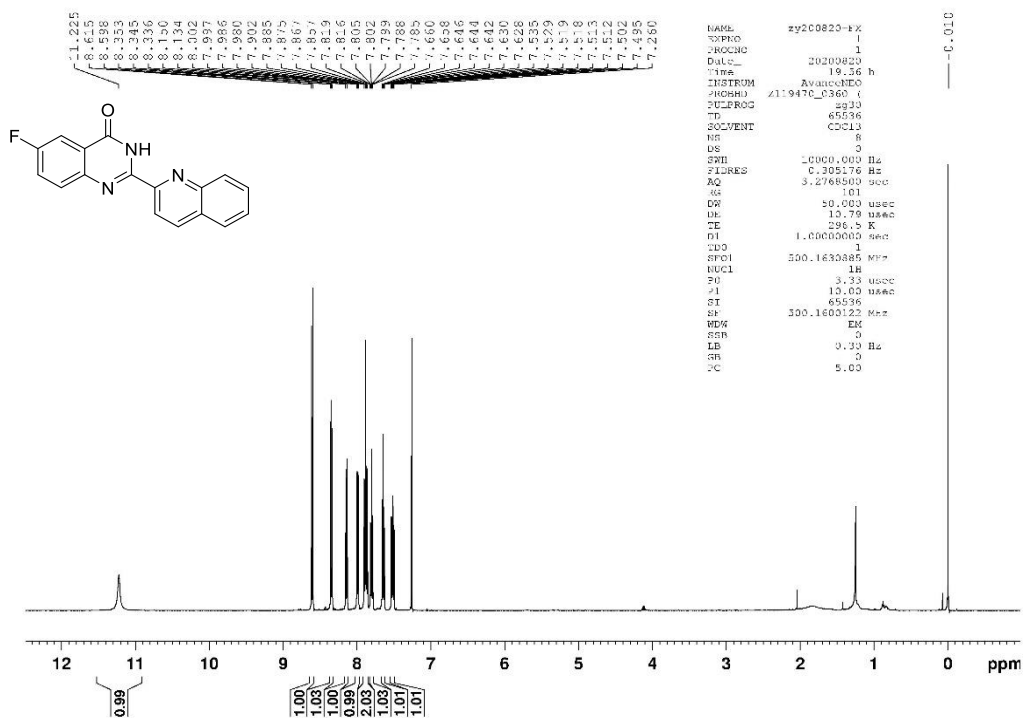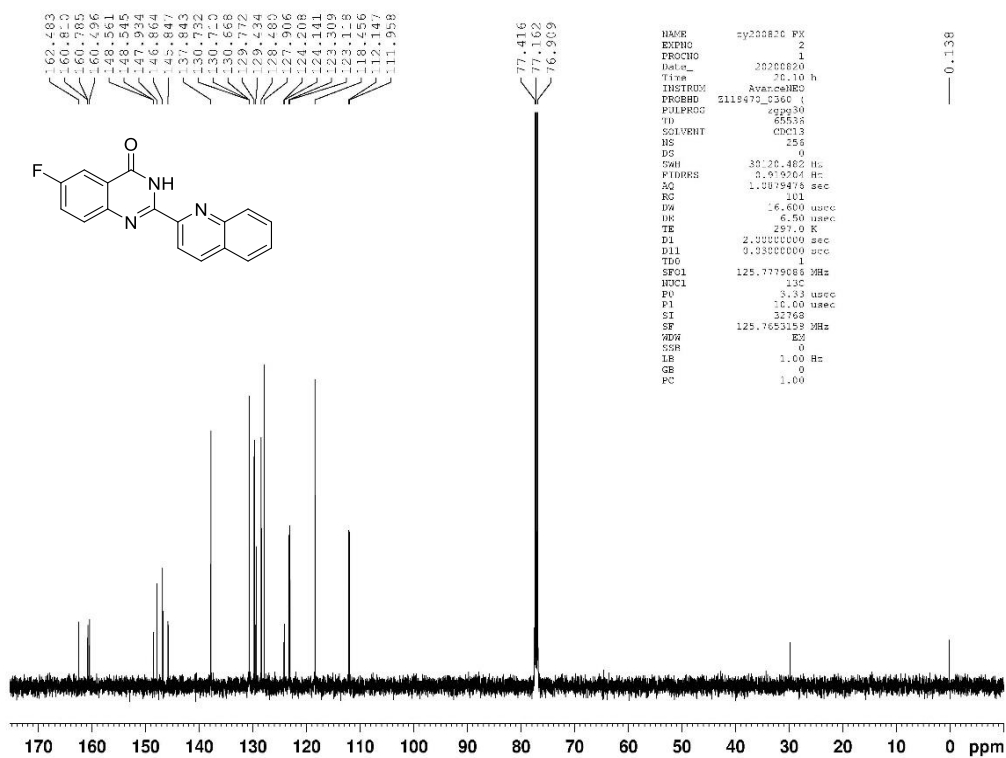

6-chloro-2-(quinolin-2-yl)quinazolin-4(3H)-one (3ca):

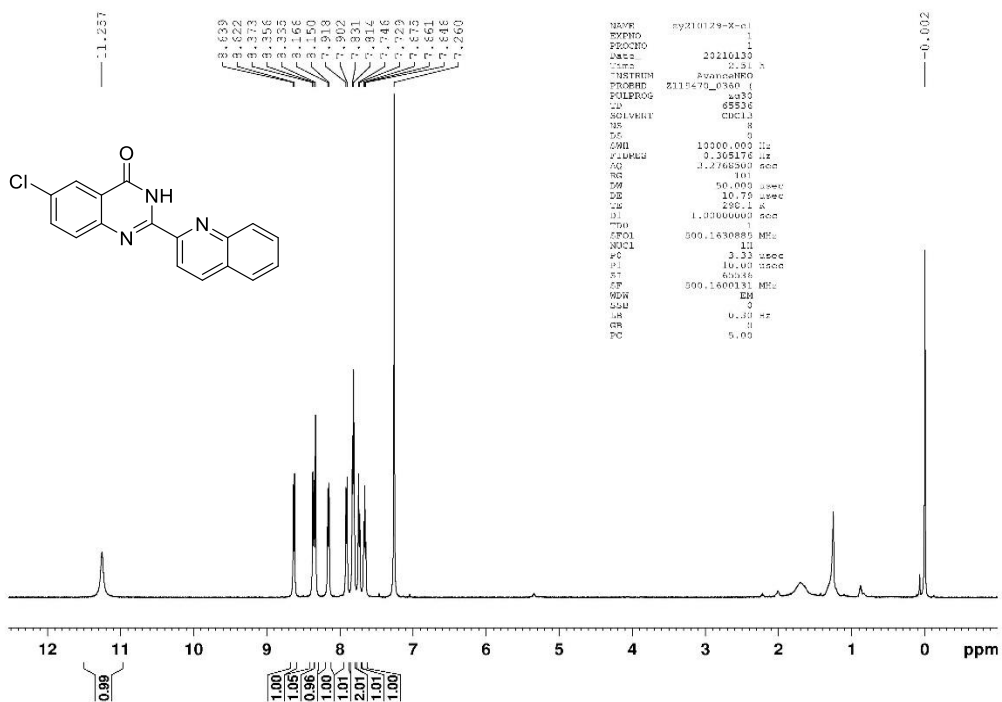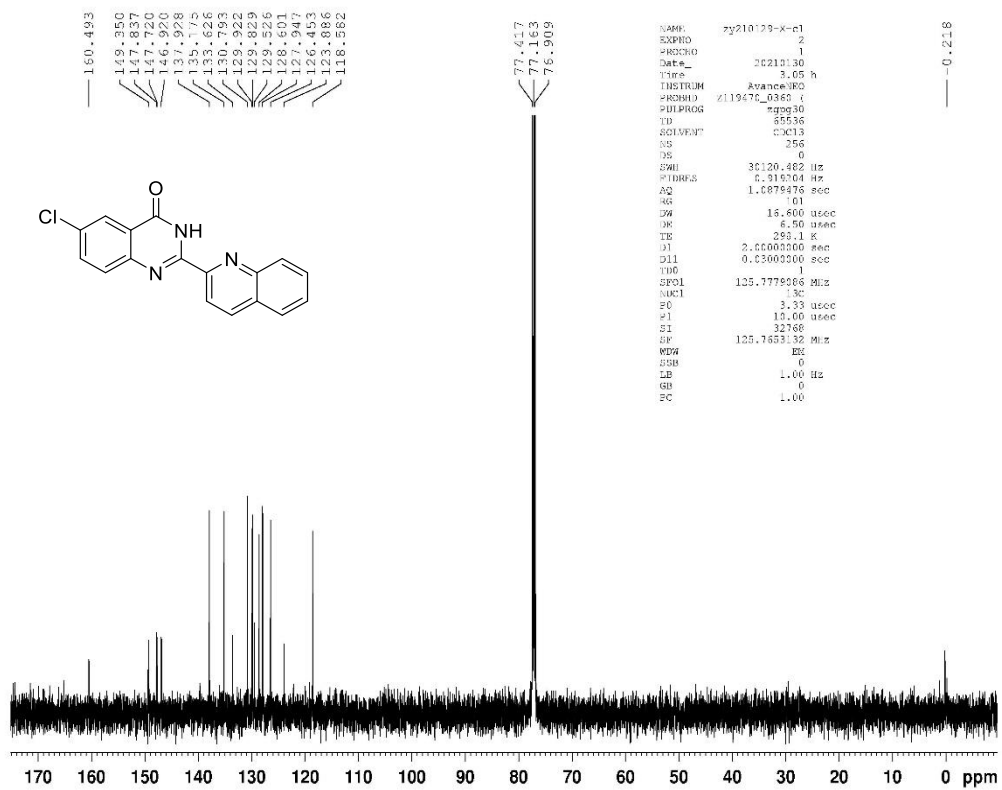

6-bromo-2-(quinolin-2-yl)quinazolin-4(3H)-one (3da):

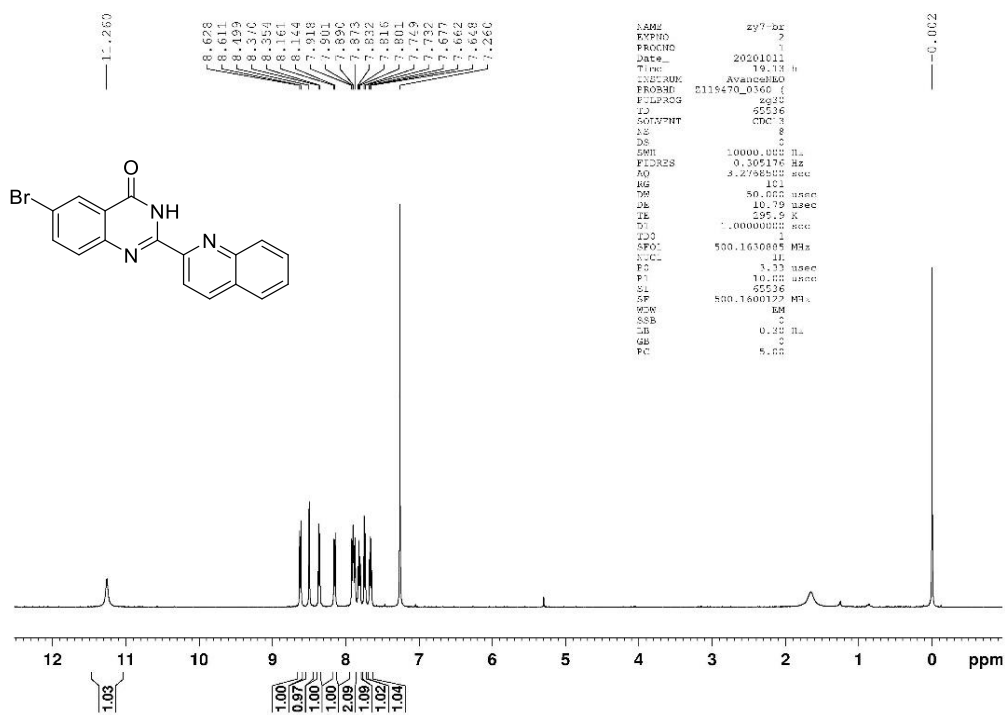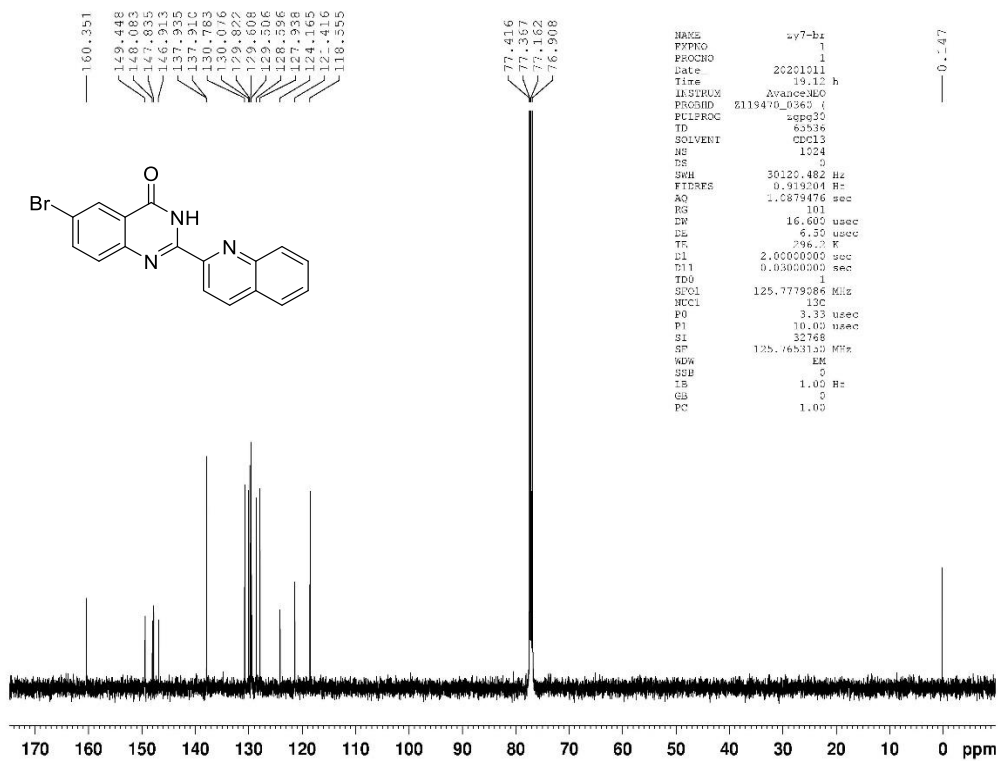

**6-iodo-2-(quinolin-2-yl)quinazolin-4(3H)-one (3ea):**

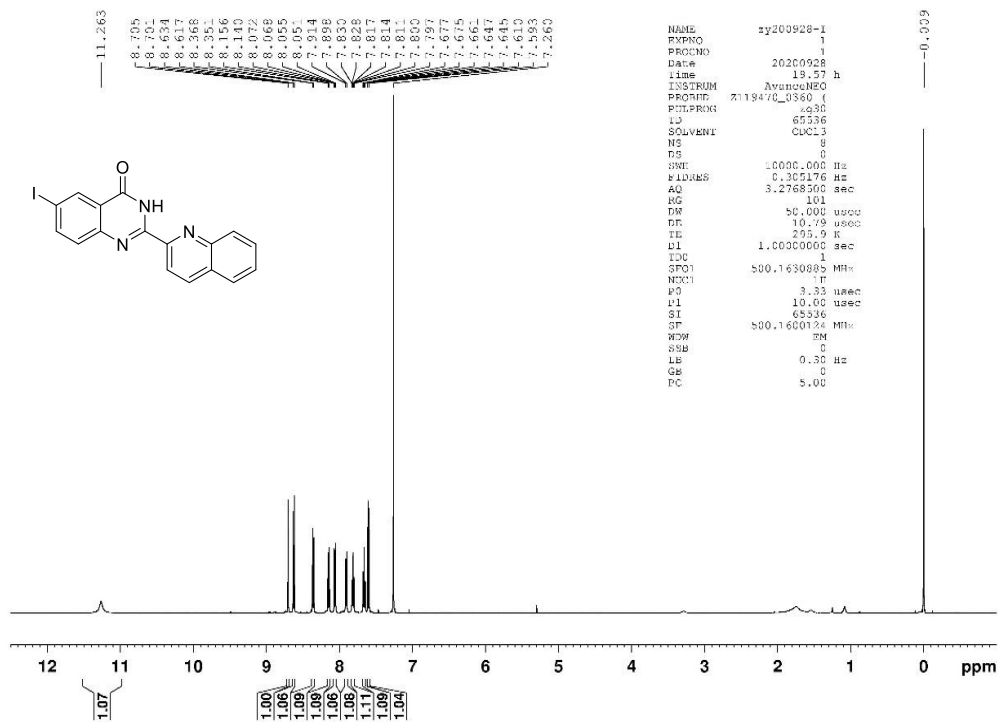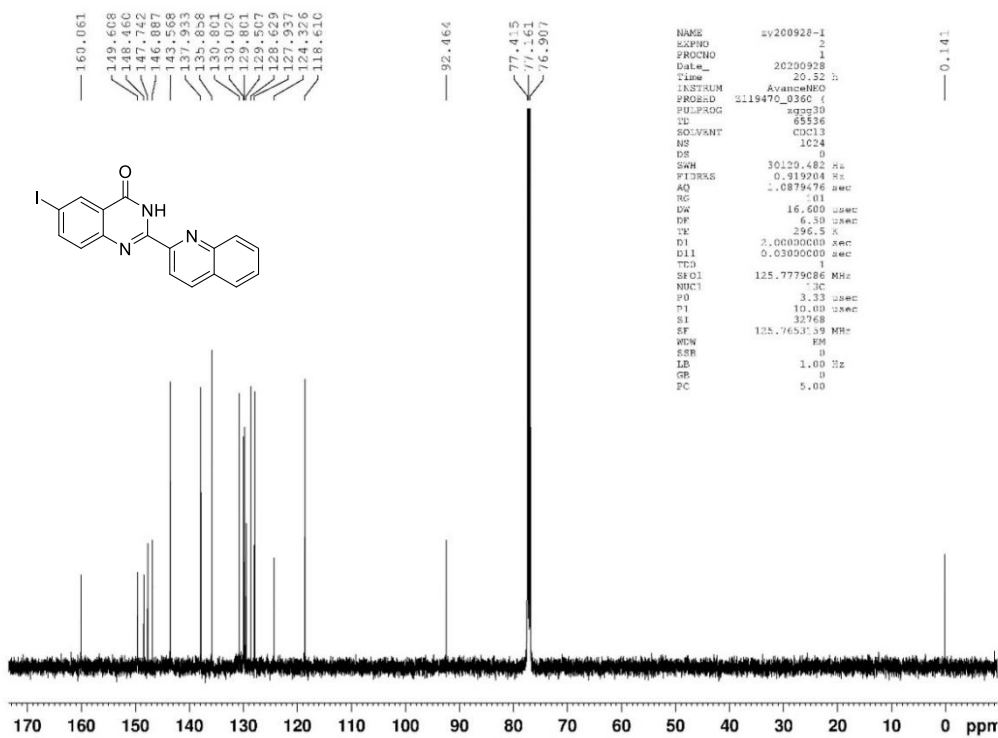

**2-(quinolin-2-yl)-6-(trifluoromethyl)quinazolin-4(3H)-one (3fa):**

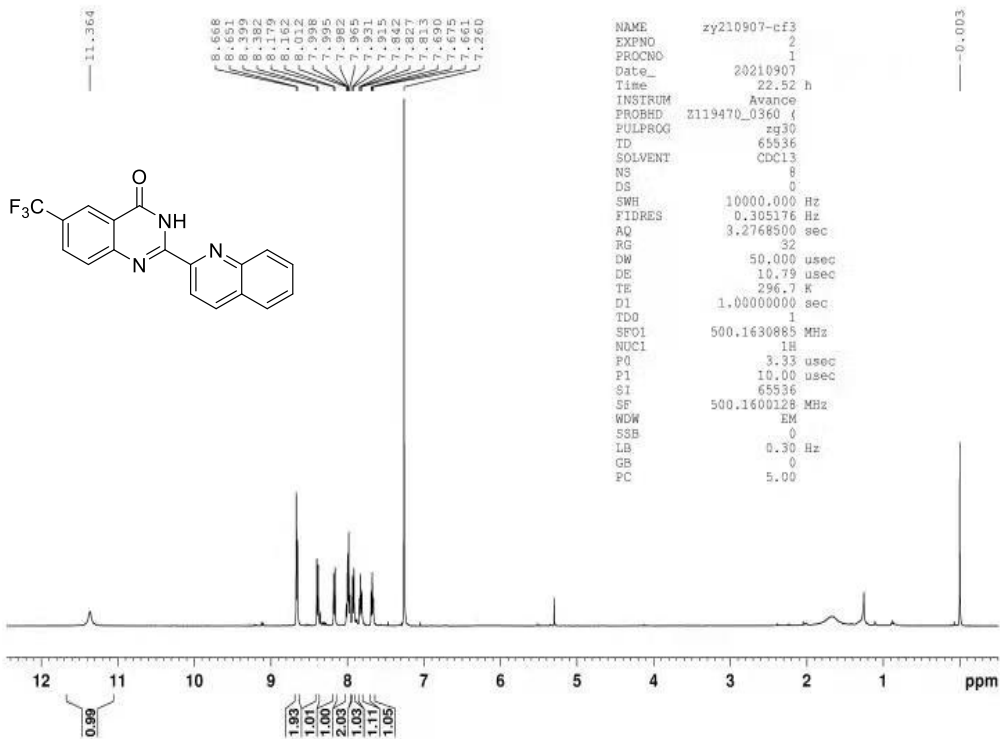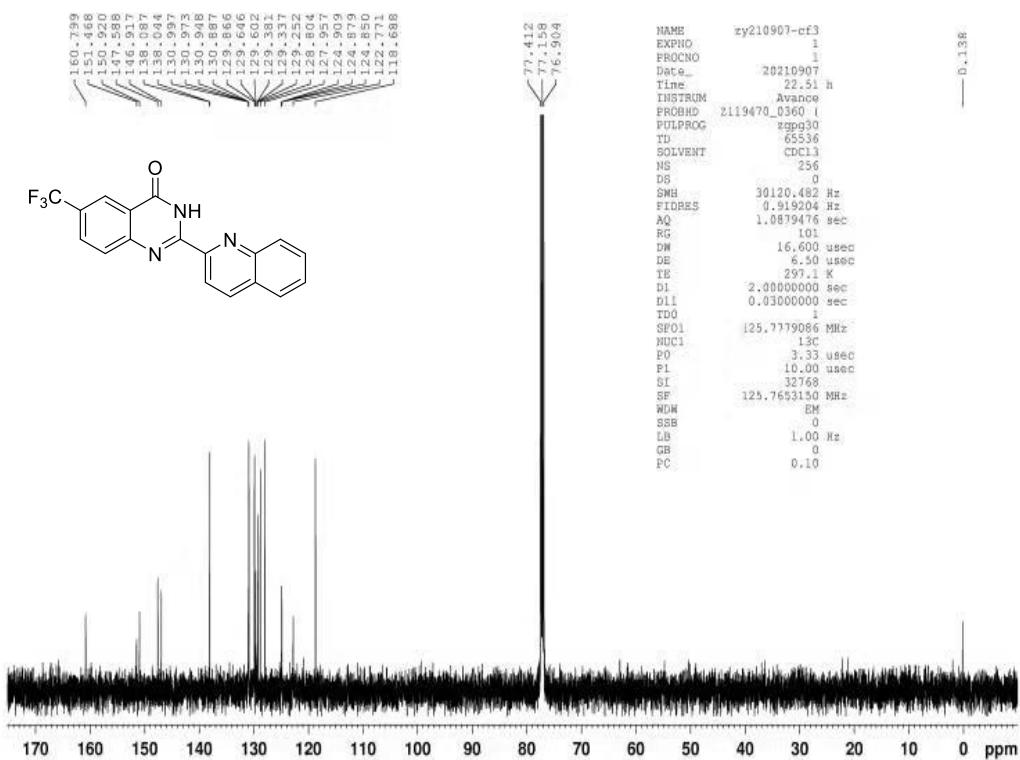

**5-bromo-2-(quinolin-2-yl)quinazolin-4(3H)-one (3ha):**

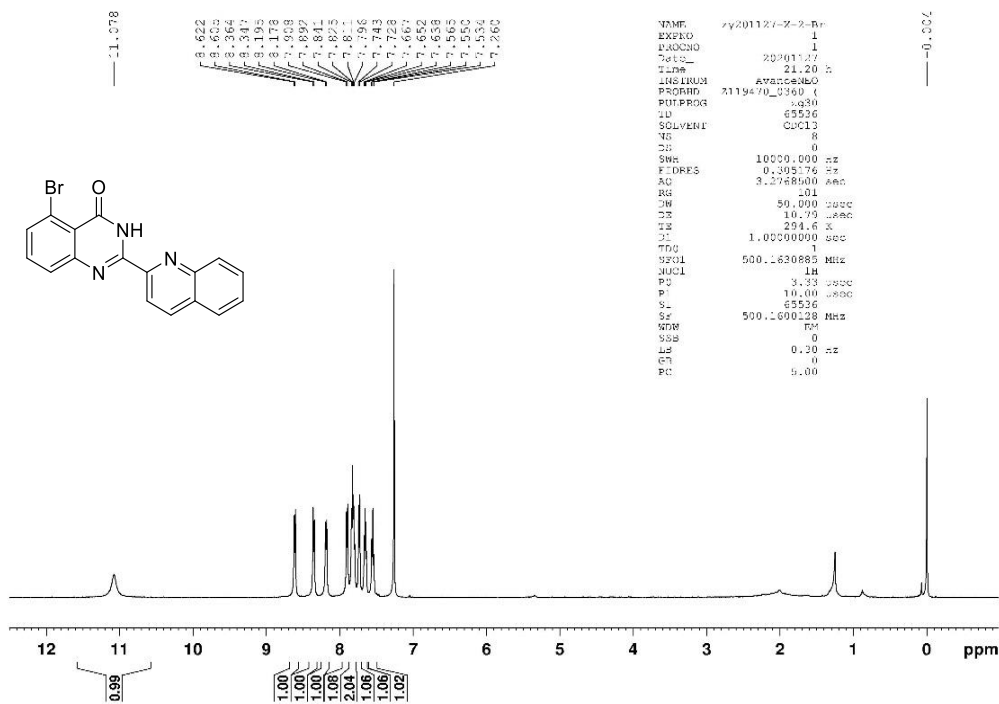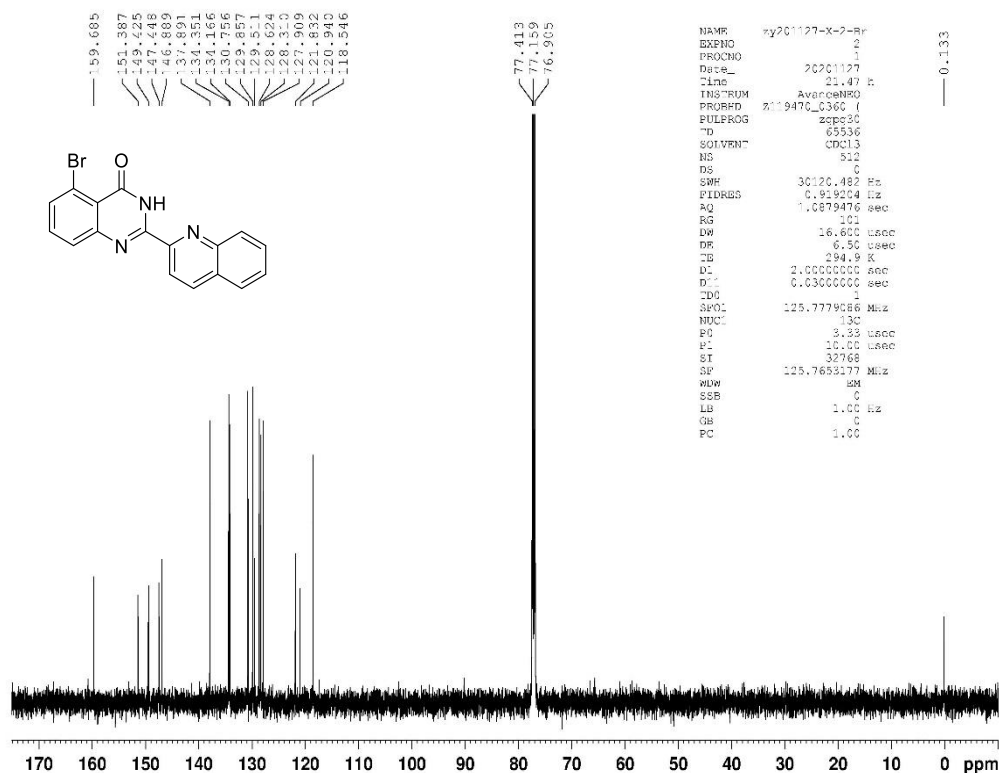



**8-fluoro-2-(quinolin-2-yl)quinazolin-4(3H)-one (3ia):**

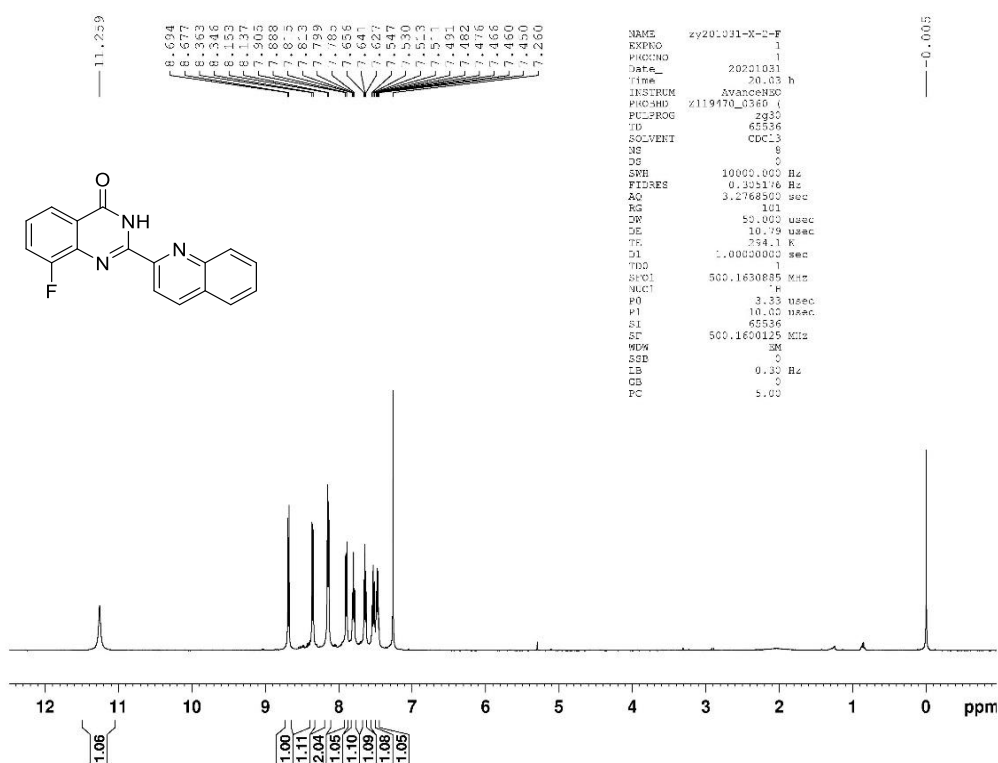

```

NAME      zy201031-X-2-F
EXPNO    1
PROCNO   1
Date_    20201031
Time     20.03 h
INSTRUM  AvanceBBO
PROCNO   Z119470_0360 (
PULPROG  zg30
TD       65536
SOLVENT  CDCl3
NS       8
DS       0
SWH      10000.000 Hz
FIDRES   0.305176 Hz
AQ       3.2768500 sec
RG       101
CW       50.000 ussec
DE       10.79 ussec
TE       294.1 K
D1       1.00000000 sec
SI       1
TDC      1
SFO1     500.1630885 MHz
NUC1     13C
PO       3.33 ussec
PT       10.00 ussec
SI       65536
SF       500.1600125 MHz
WDW      EM
SSB      0
LB       0.30 Hz
GB       0
PC       5.00
    
```

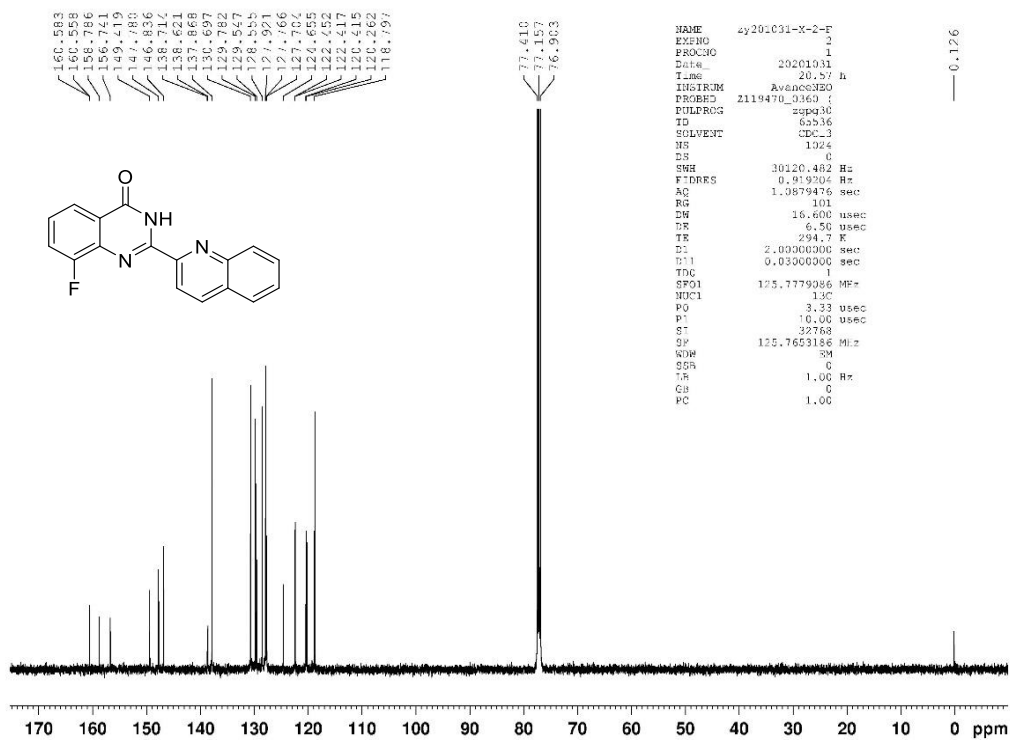

```

NAME      zy201031-X-2-F
EXPNO    1
PROCNO   1
Date_    20201031
Time     20.57 h
INSTRUM  AvanceBBO
PROCNO   Z119470_0360 (
PULPROG  zgpg30
TD       65536
SOLVENT  CDCl3
NS       1024
DS       0
SWH      30120.482 Hz
FIDRES   0.919306 Hz
AQ       1.0879476 sec
RG       101
CW       16.600 ussec
DE       6.50 ussec
TE       294.7 K
D1       2.00000000 sec
D11      0.03000000 sec
TDC      1
SFO1     125.7779086 MHz
NUC1     13C
PO       3.33 ussec
PT       10.00 ussec
SI       32768
SF       125.7653186 MHz
WDW      EM
SSB      0
LB       1.00 Hz
GB       0
PC       1.00
    
```

### 6-methyl-2-(quinolin-2-yl)quinazolin-4(3H)-one (3ja)

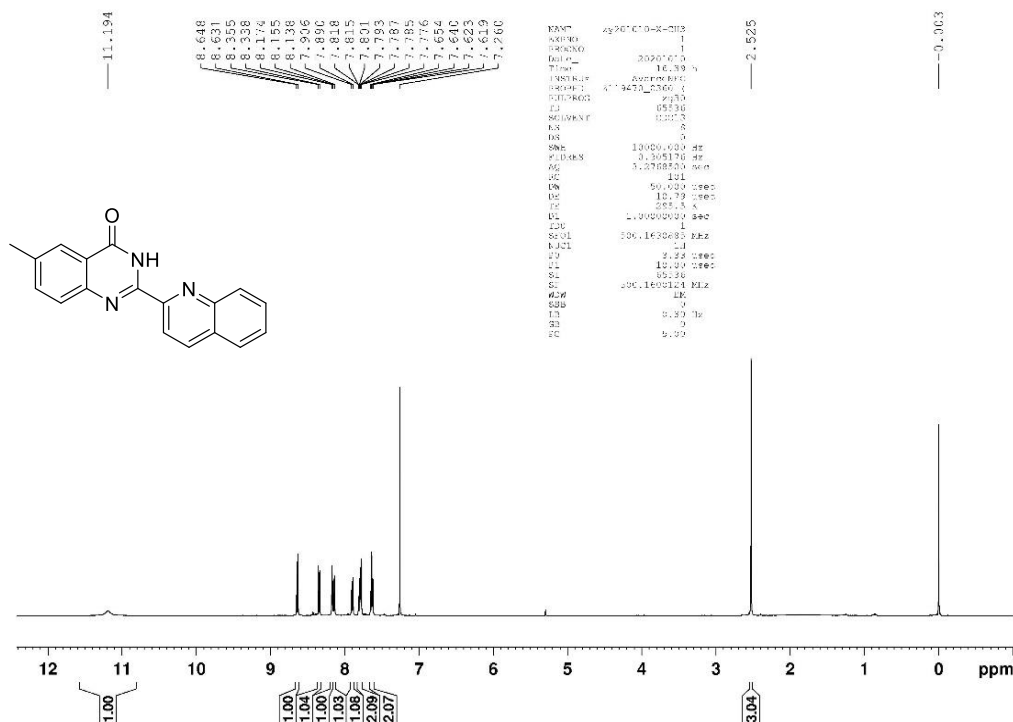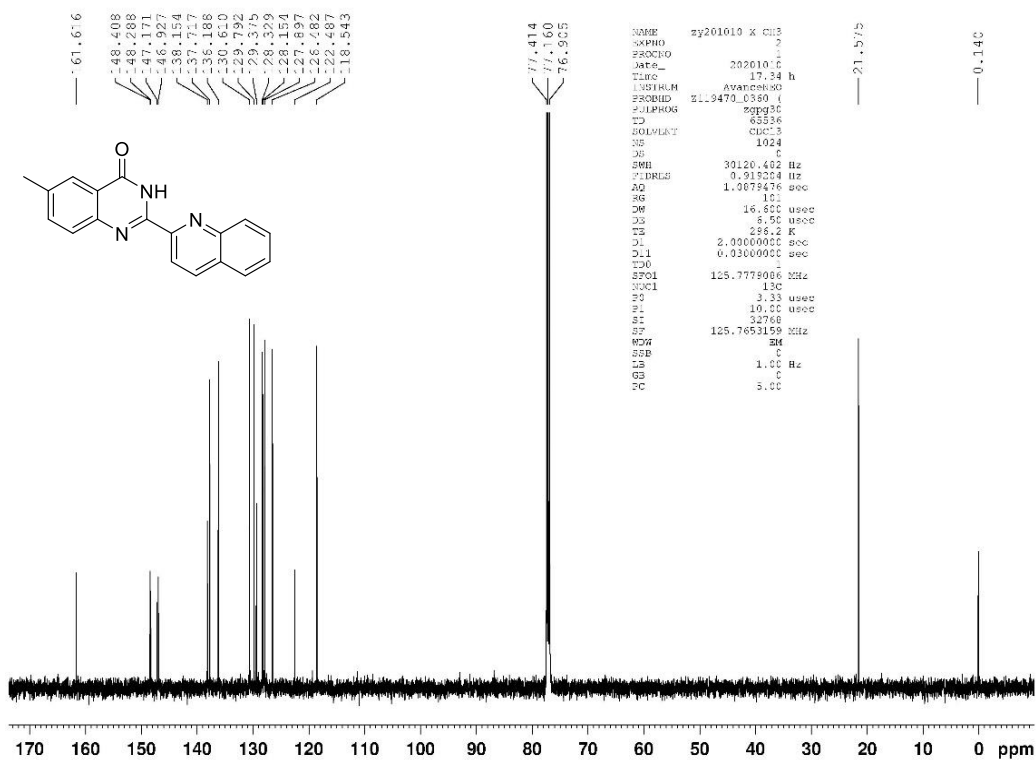

6-methoxy-2-(quinolin-2-yl)quinazolin-4(3H)-one (3ka):

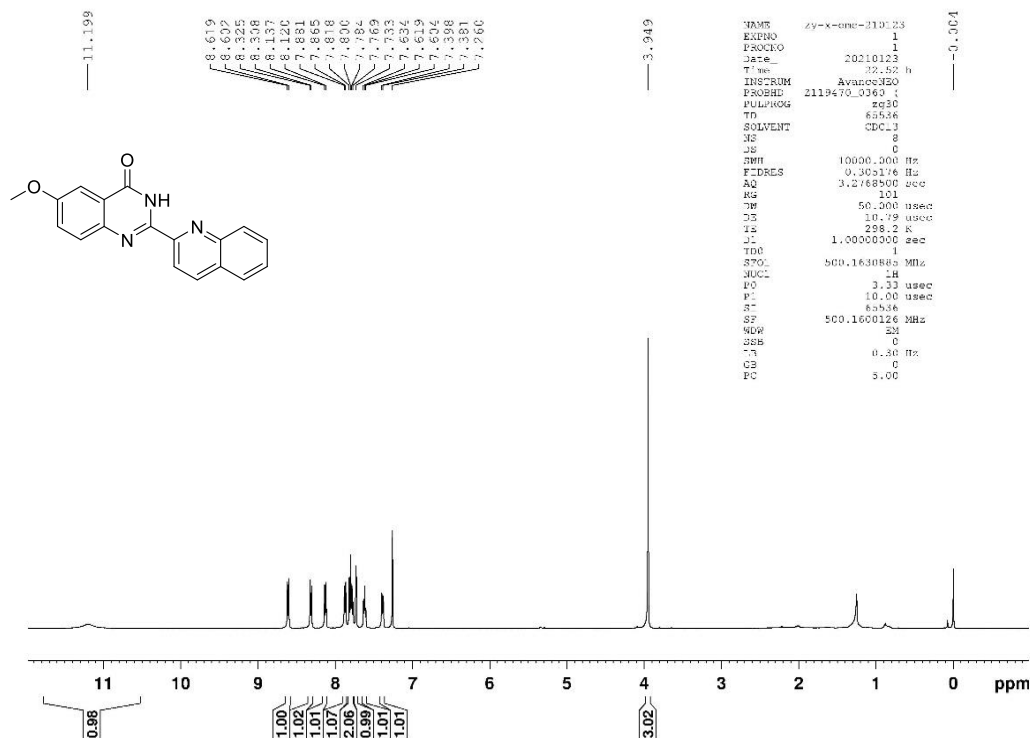

```

NAME zy-x-one-210123
EXPNO 1
PROCNO 1
Date_ 20210123
Time 22.52 h
INSTRUM AvanceMEO
PROBHD 2119470_0360
PULPROG zgpg30
TD 65536
SOLVENT CDCl3
NS 8
DS 0
SWH 10000.000 Hz
FIDRES 0.305176 Hz
AQ 3.2168900 sec
RG 101
TM 50.000 usec
DE 18.79 usec
TE 298.2 K
JI 1.00000000 sec
TD0 1
SFO1 500.163084 MHz
NUC1 1H
PC 3.33 usec
PI 10.00 usec
SI 32768
SF 500.1600126 MHz
WDW EM
SSB 0
LB 0.30 Hz
GB 0
PC 5.00
    
```

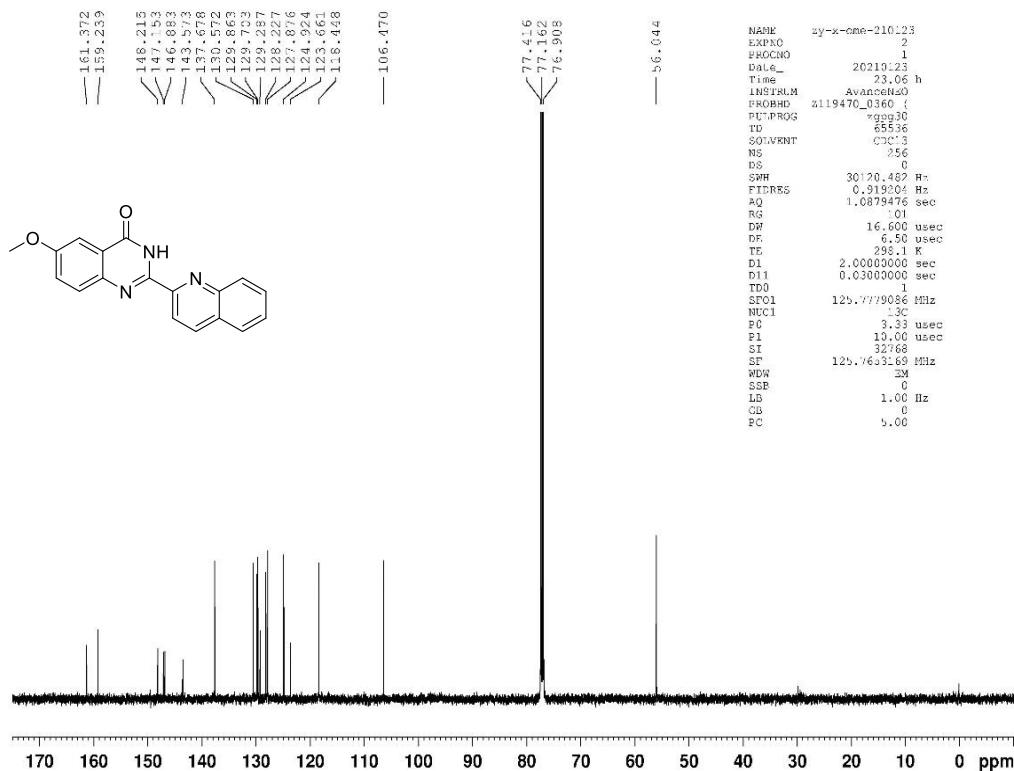

```

NAME zy-x-one-210123
EXPNO 2
PROCNO 1
Date_ 20210123
Time 23.06 h
INSTRUM AvanceMEO
PROBHD 2119470_0360
PULPROG zgpg30
TD 65536
SOLVENT CDCl3
NS 256
DS 0
SWH 3070.482 Hz
FIDRES 0.319304 Hz
AQ 1.0879476 sec
RG 101
DE 16.600 usec
DE 6.50 usec
TE 298.1 K
D1 2.00000000 sec
D11 0.03000000 sec
TD0 1
SFO1 125.7679086 MHz
NUC1 13C
PC 3.33 usec
PI 10.00 usec
SI 32768
SF 125.7633189 MHz
WDW EM
SSB 0
LB 1.00 Hz
GB 0
PC 5.00
    
```

7-dimethoxy-2-(quinolin-2-yl)quinazolin-4(3H)-one (3la):

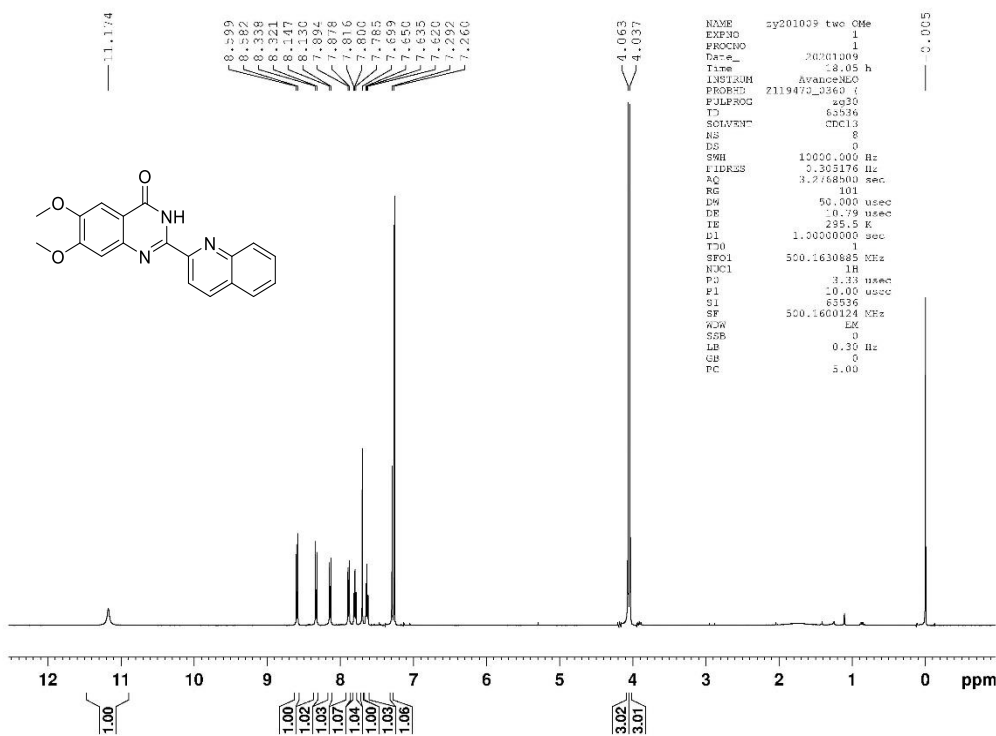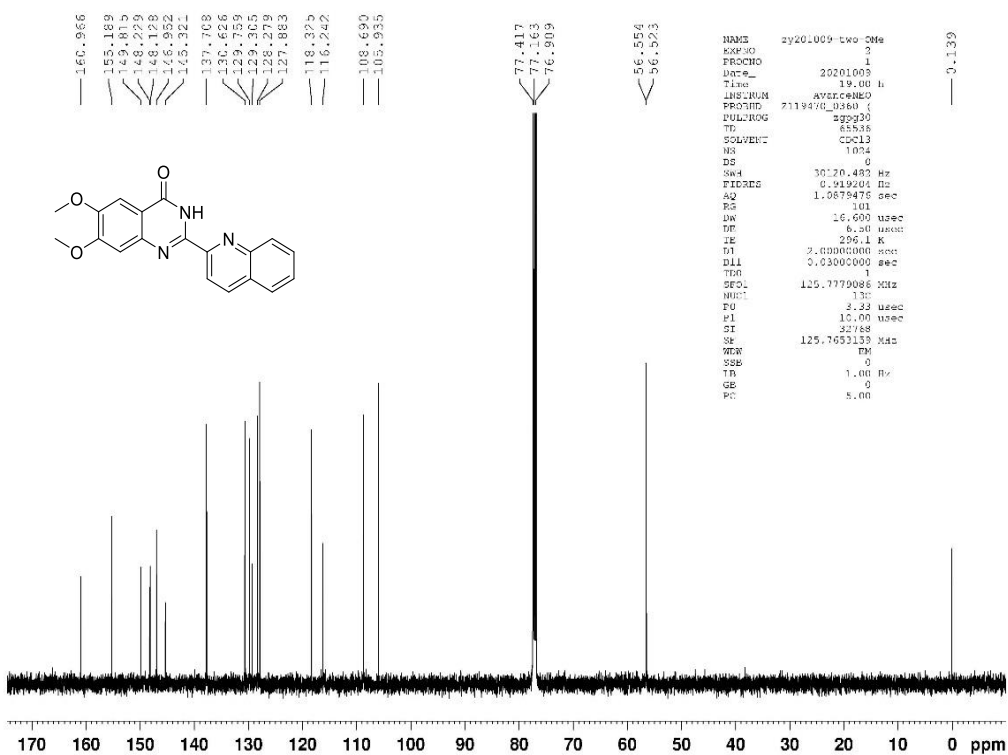

3-methyl-2-(quinolin-2-yl)quinazolin-4(3H)-one (3ma):

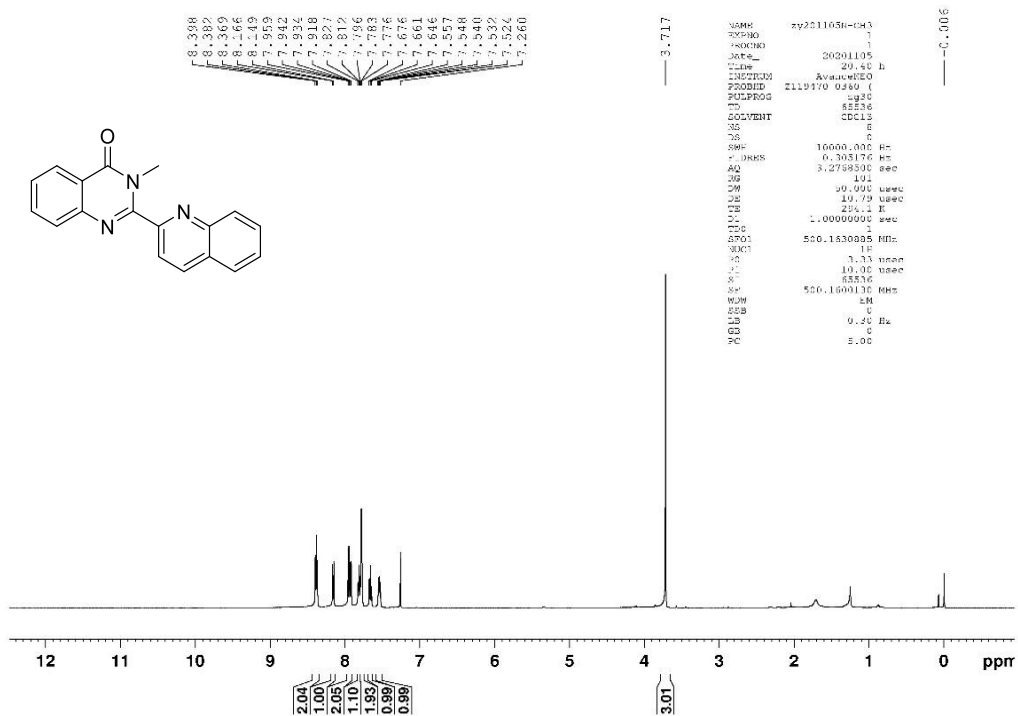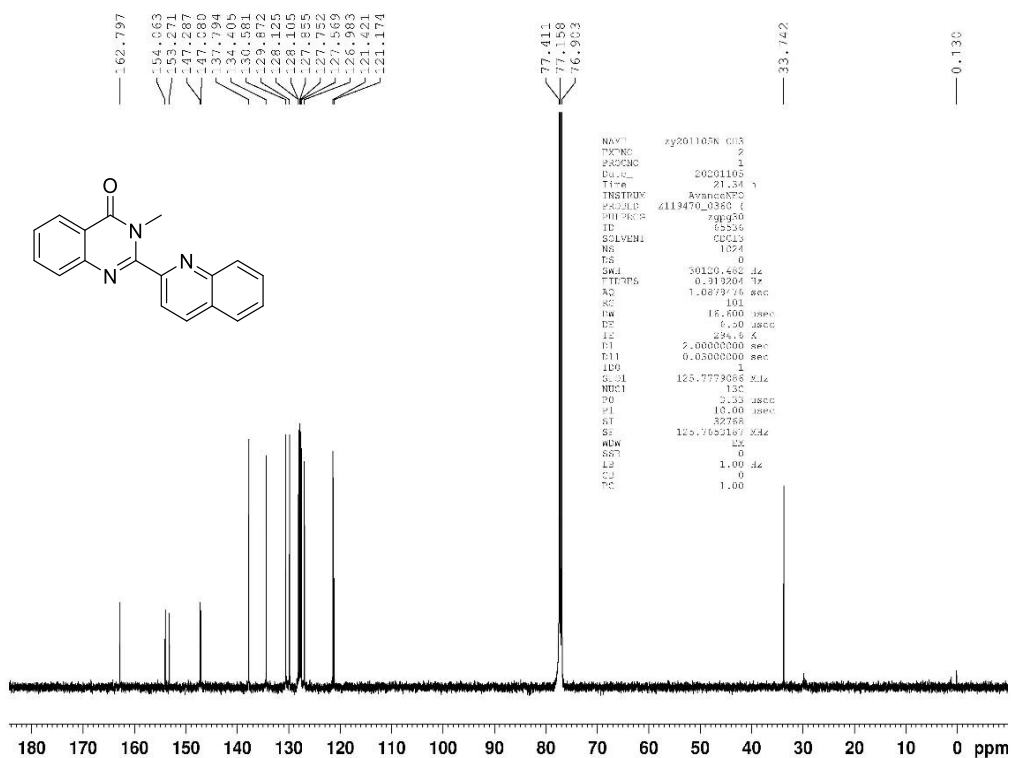

**3-propyl-2-(quinolin-2-yl)quinazolin-4(3H)-one (3na):**

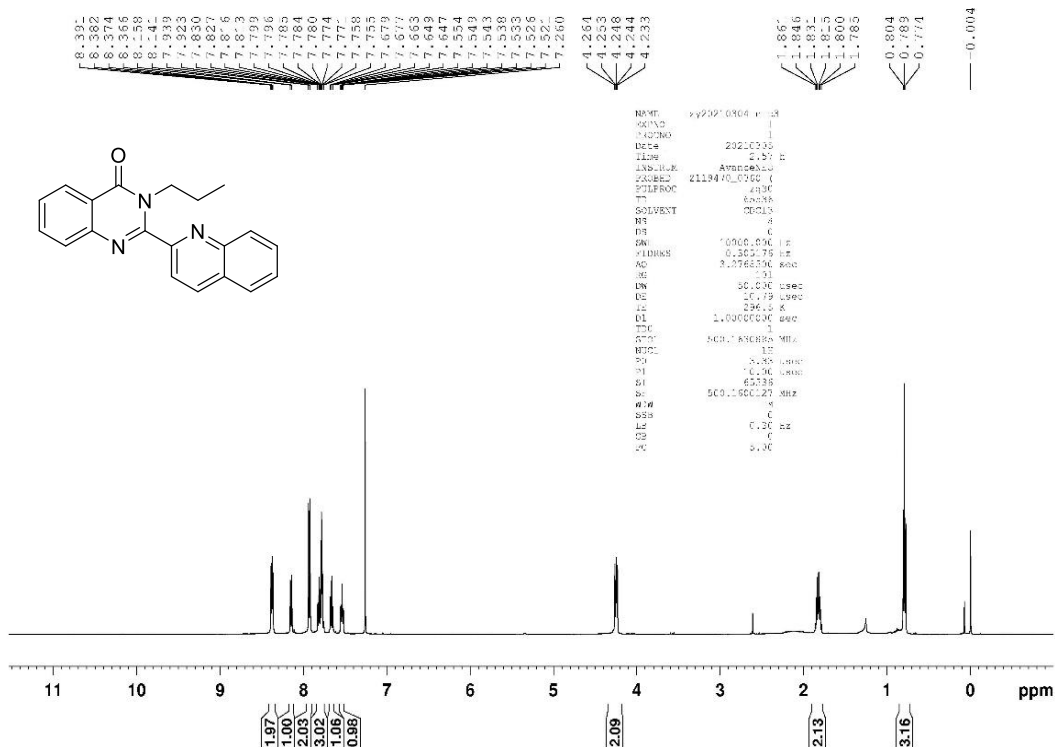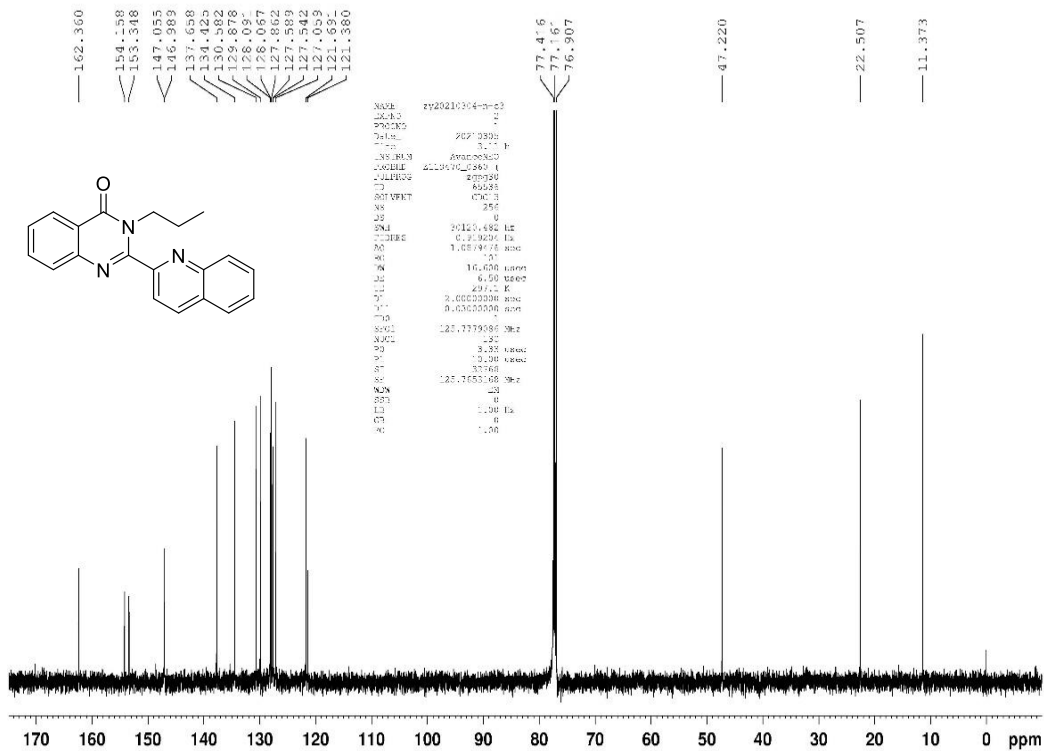

**3-isopropyl-2-(quinolin-2-yl)quinazolin-4(3H)-one (30a):**

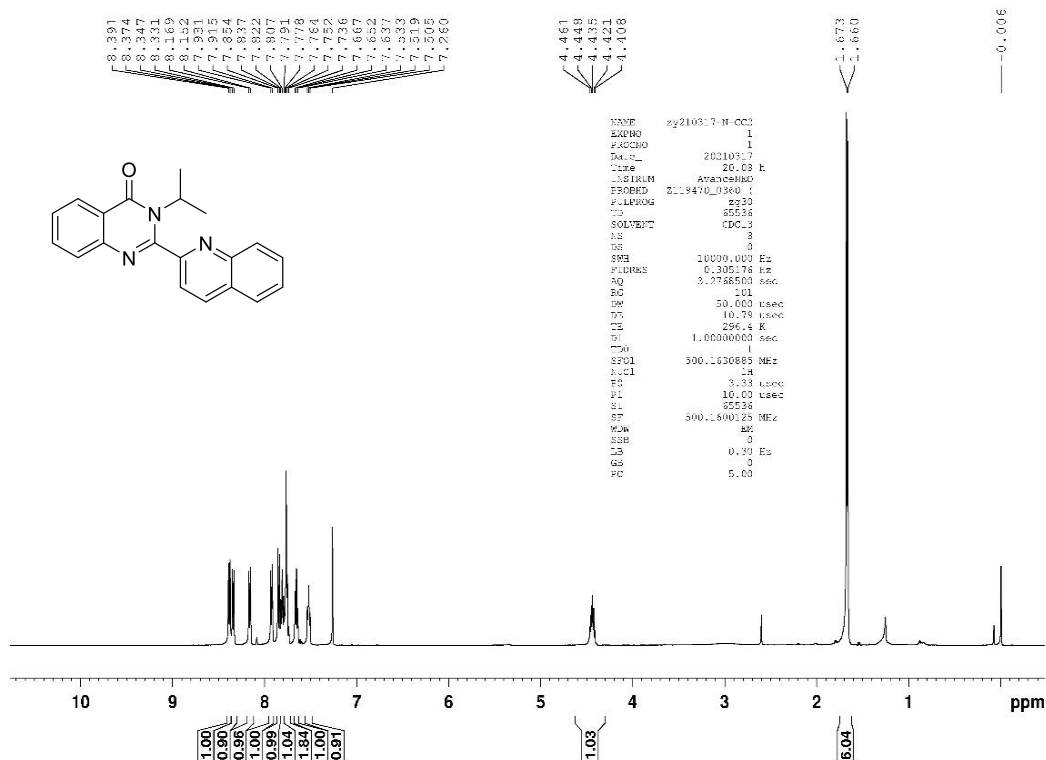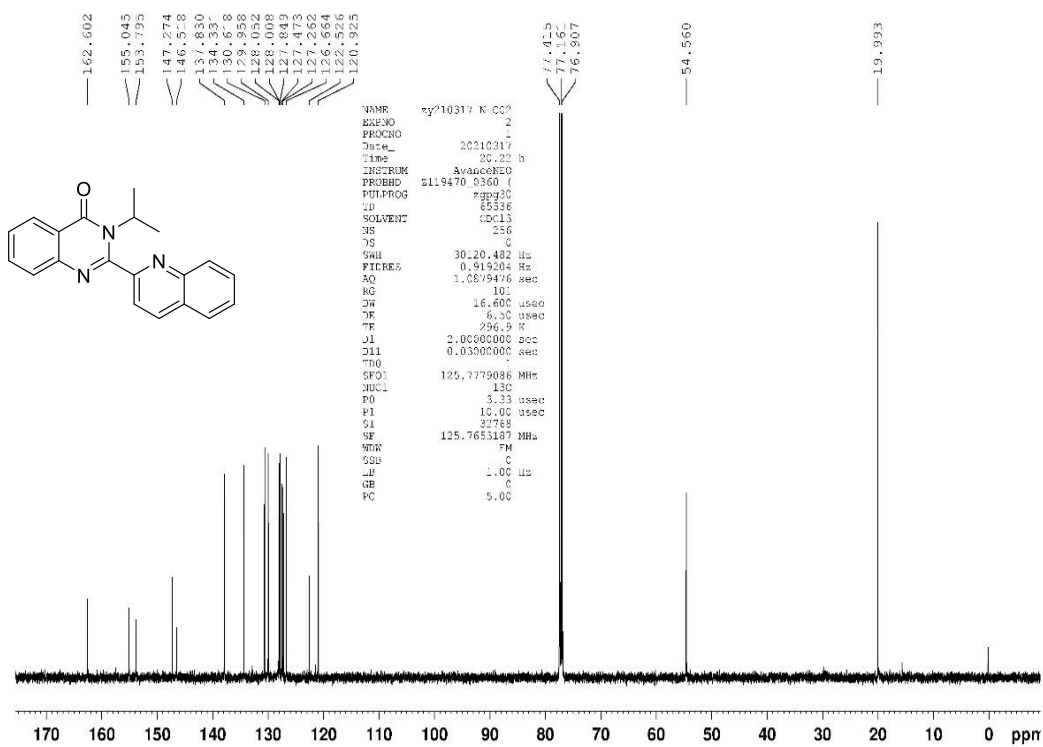

**2-(6-fluoroquinolin-2-yl)quinazolin-4(3H)-one (3ab):**

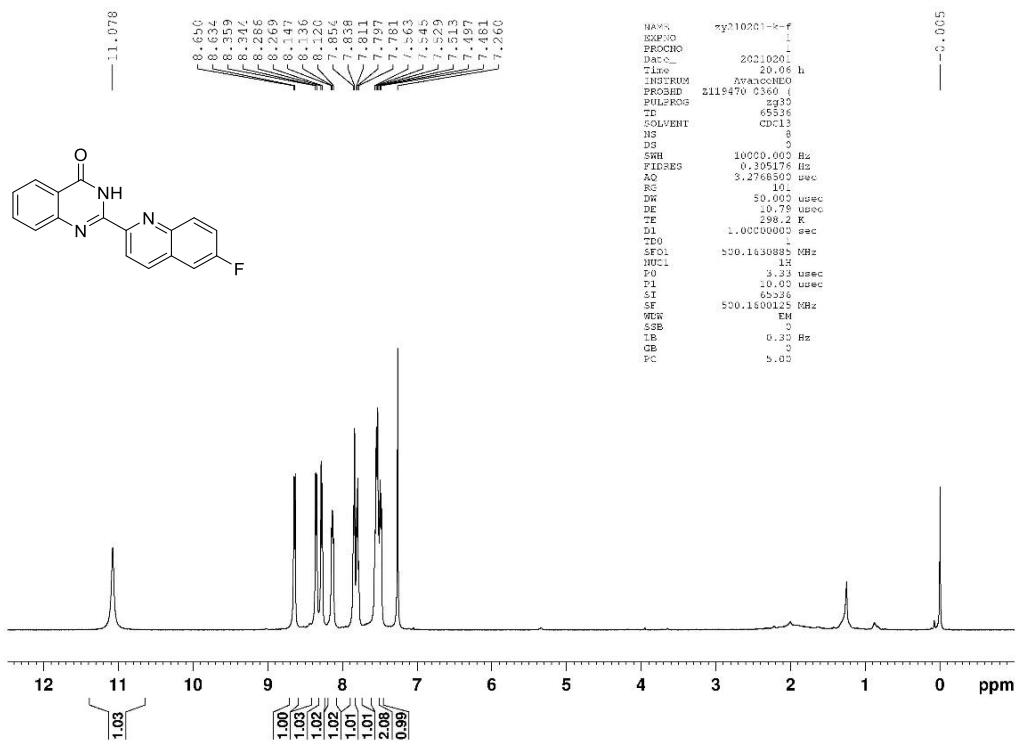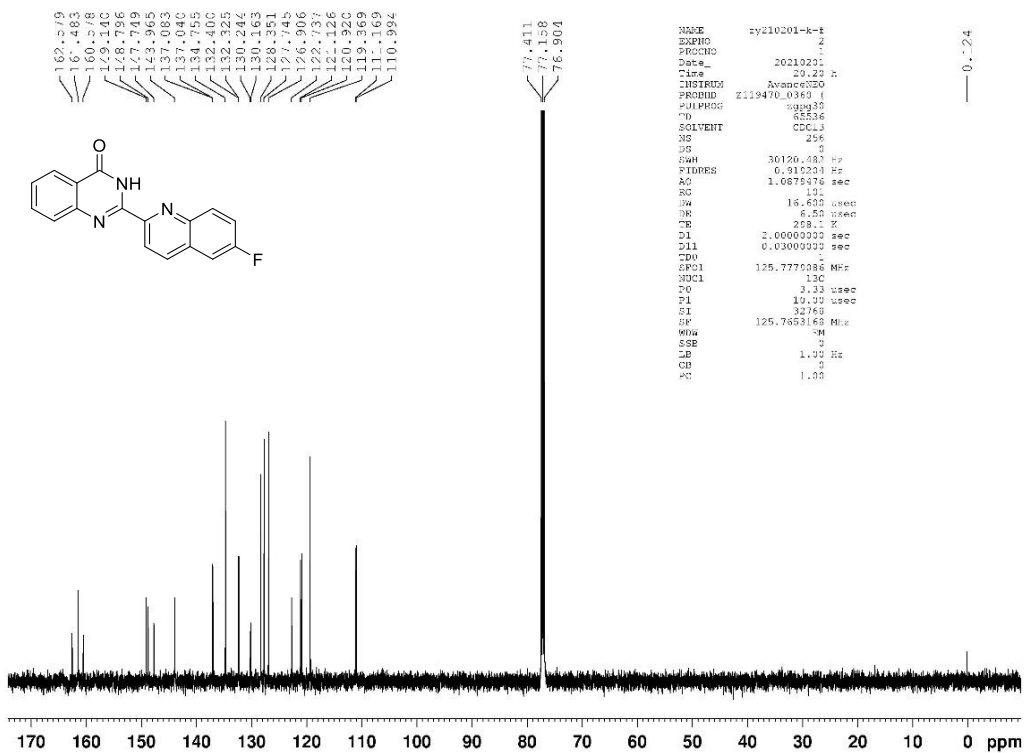



2-(6-chloroquinolin-2-yl)quinazolin-4(3H)-one (3ac):

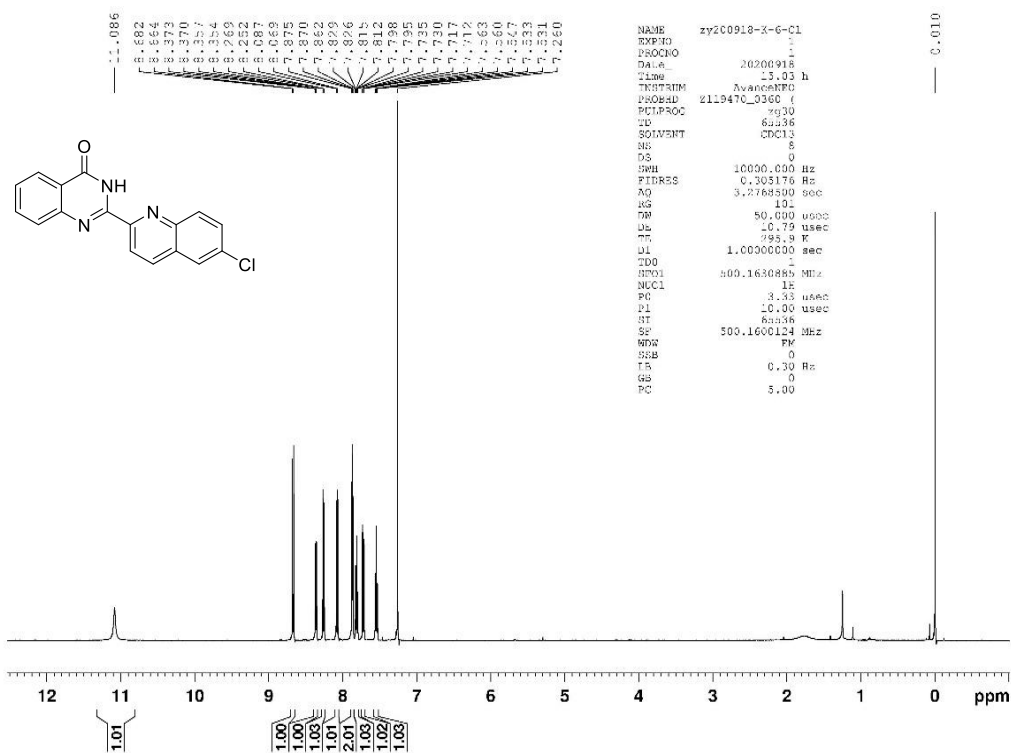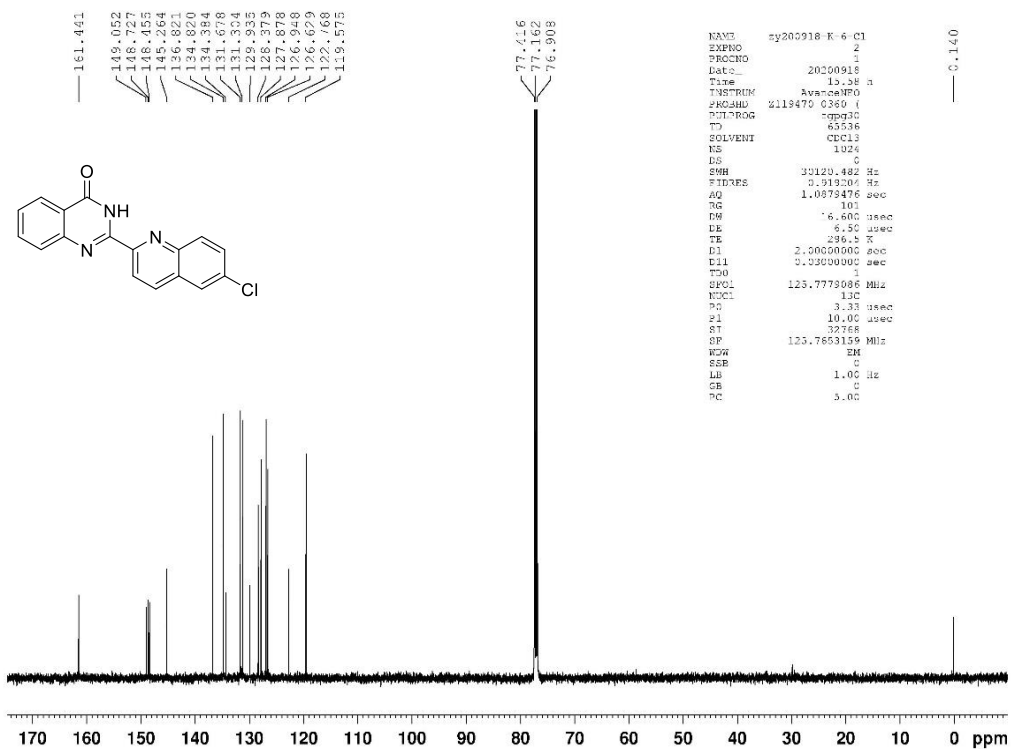

**2-(7-chloroquinolin-2-yl)quinazolin-4(3H)-one (3ad):**

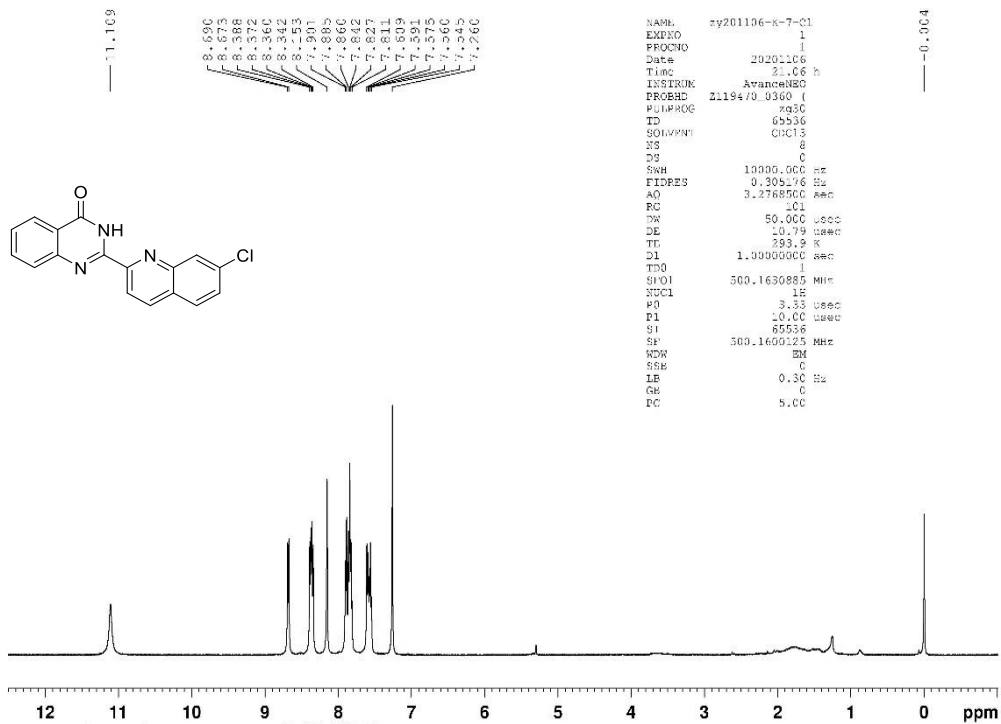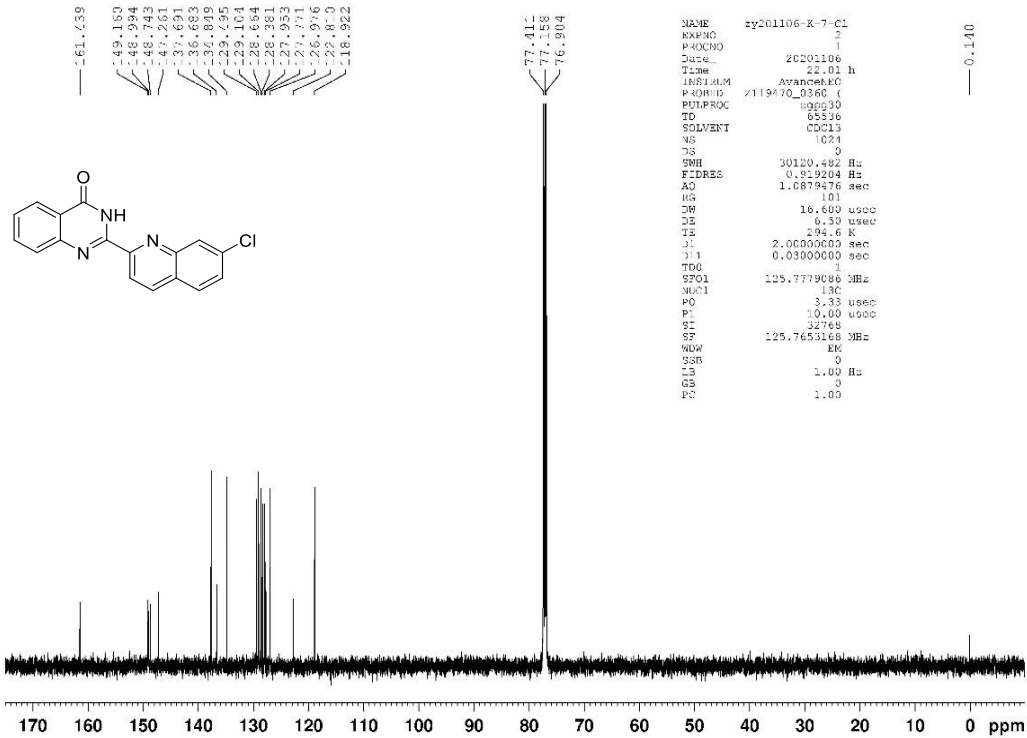

2-(6-bromoquinolin-2-yl)quinazolin-4(3H)-one (3ae):

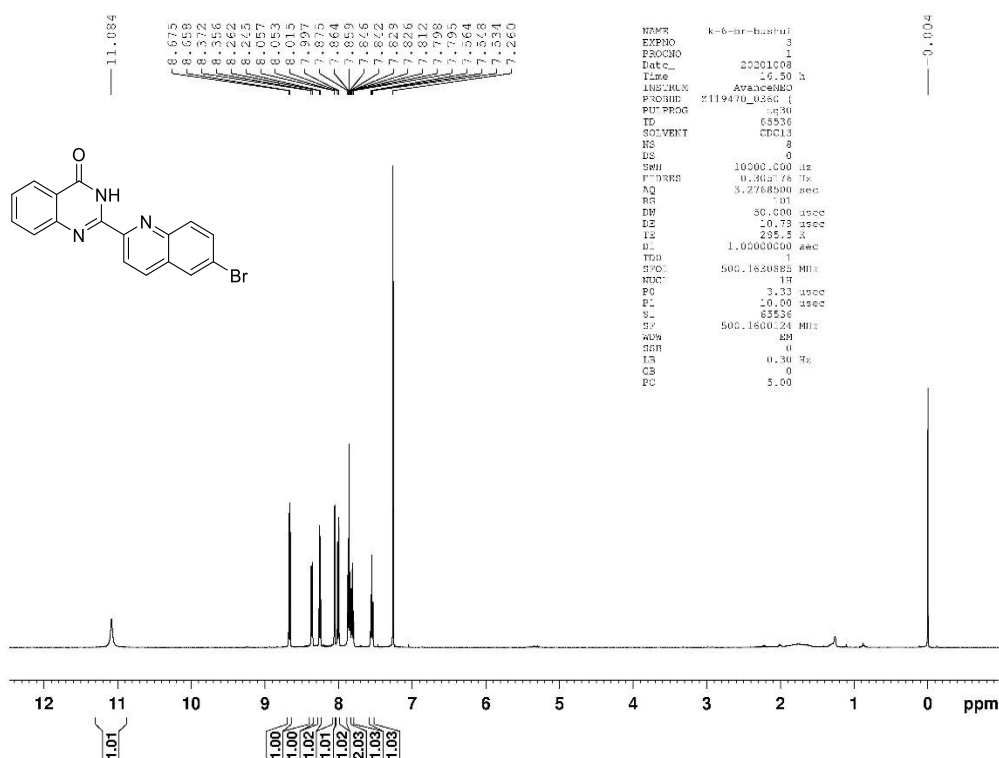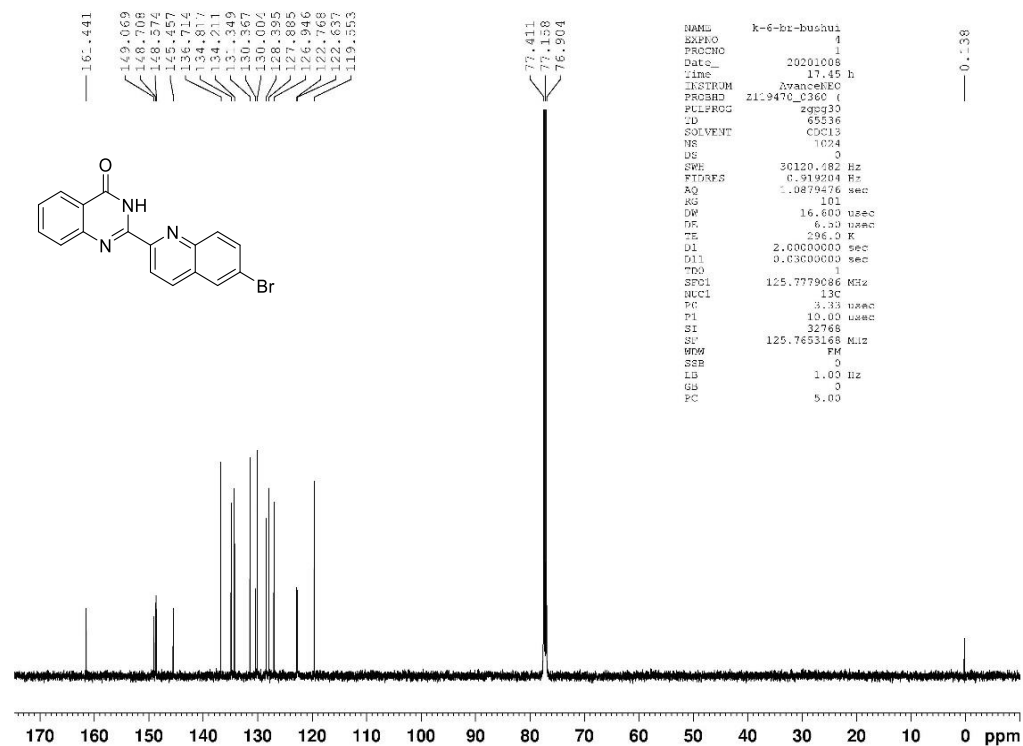

2-(8-bromoquinolin-2-yl)quinazolin-4(3H)-one (3af):

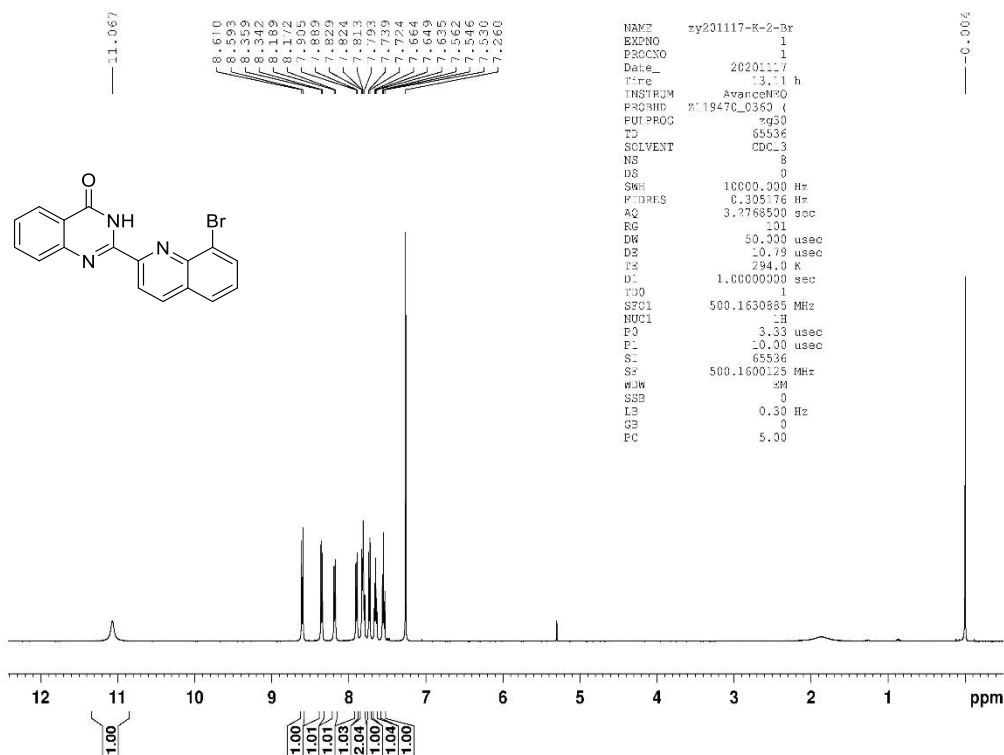

```

NAME      zy201117-K-2-Br
EXPNO     1
PROCNO    1
Date_     20201117
Time      3.11 h
INSTRUM   Avance600
PROBHD    Z119470_0380 (
PULPROG   zg30
TD         65536
SOLVENT   CDCl3
NS         8
DS         0
SWH        10000.000 Hz
F2DRFS     0.305176 Hz
AQ         3.2768500 sec
RG         101
DW         50.300 usec
DE         10.79 usec
TE         294.0 K
D1         1.00000000 sec
TJ0        1
SFO1       500.1630885 MHz
NUC1       13
P0         3.33 usec
P1         10.00 usec
S1         65536
S2         500.1600125 MHz
wJH        3M
SES        0
LB         0.30 Hz
GB         0
PC         5.00
    
```

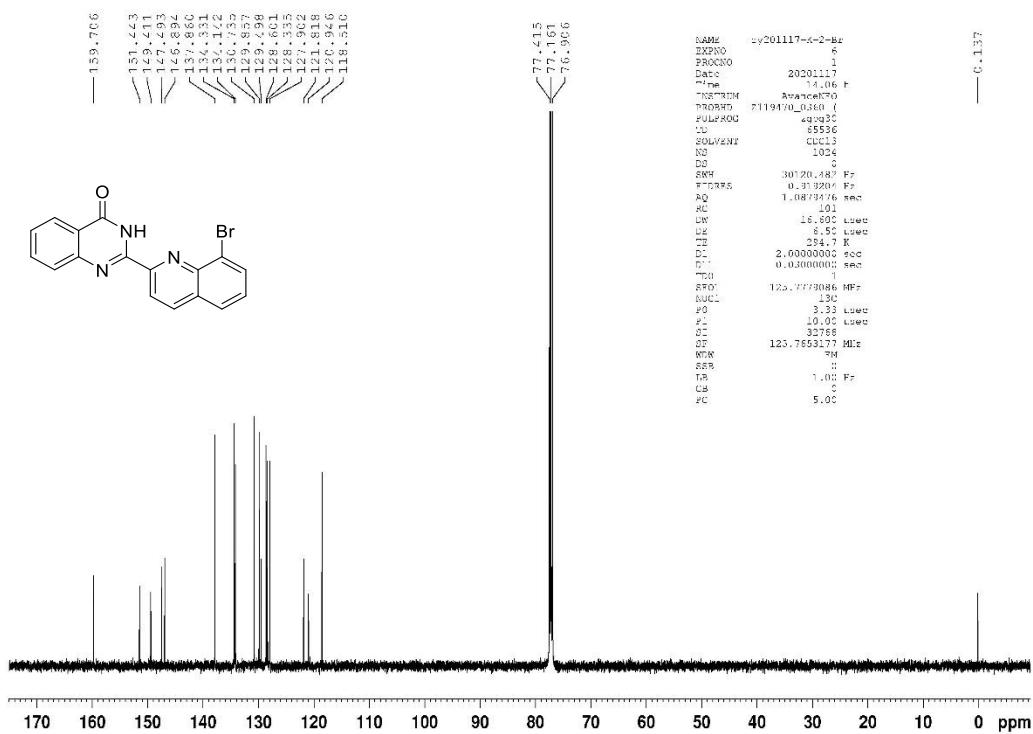

```

NAME      zy201117-K-2-Br
EXPNO     5
PROCNO    1
Date_     20201117
Time      14.06 h
INSTRUM   Avance600
PROBHD    Z119470_0380 (
PULPROG   zgpg30
TD         65536
SOLVENT   CDCl3
NS         8
DS         0
SWH        30120.487 Hz
F2DRFS     0.313204 Hz
AQ         1.0879746 sec
RG         101
DW         16.600 usec
DE         6.50 usec
TE         294.2 K
D1         2.00000000 sec
TJ0        1
SFO1       125.7773086 MHz
NUC1       13
P0         3.33 usec
P1         10.00 usec
S1         32768
S2         125.7653177 MHz
wJH        3M
SES        0
LB         1.00 Hz
GB         0
PC         5.00
    
```

**2-(7-(trifluoromethyl)quinolin-2-yl)quinazolin-4(3H)-one (3ag):**

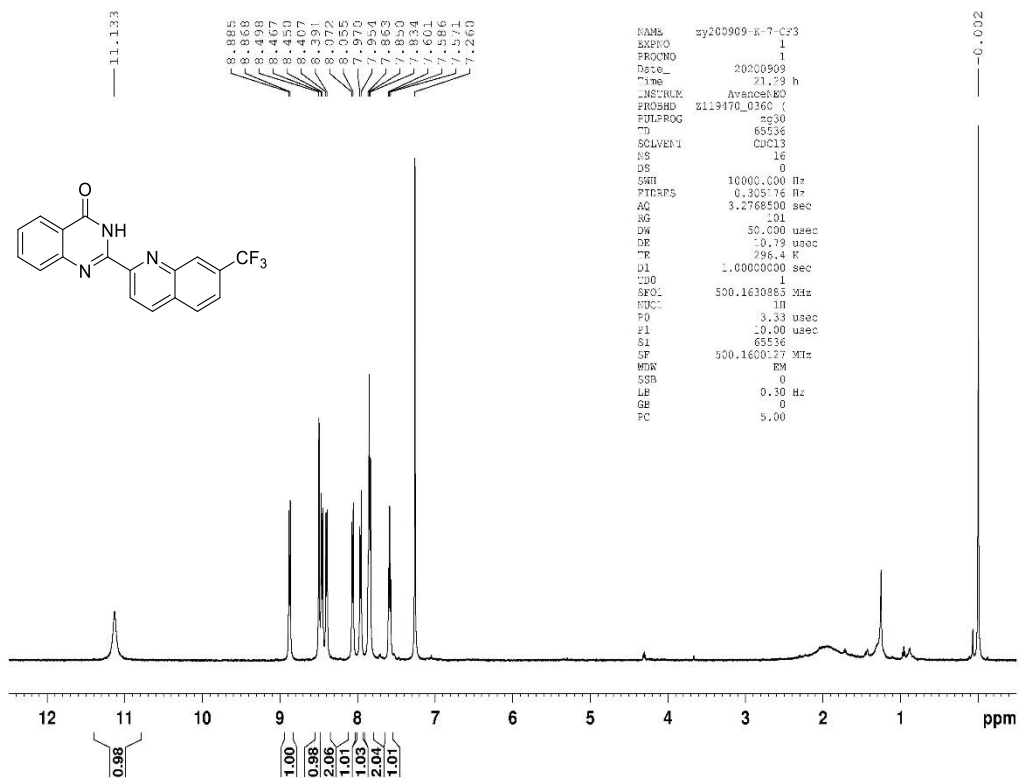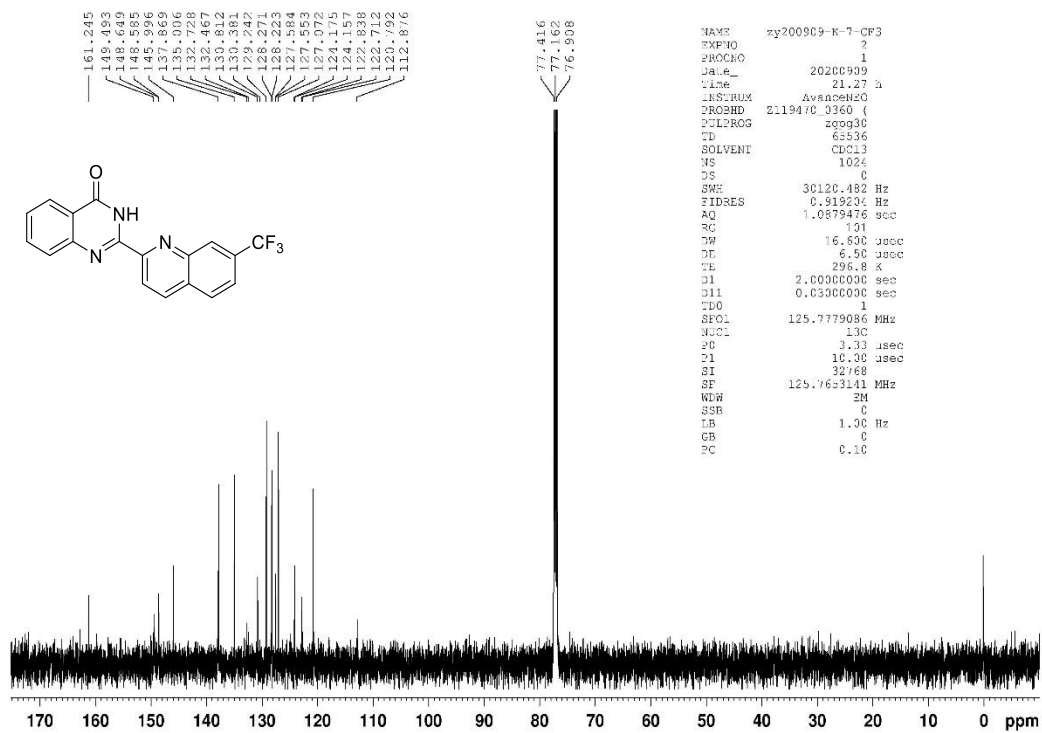

2-(6-methoxyquinolin-2-yl)quinazolin-4(3H)-one (3ah):

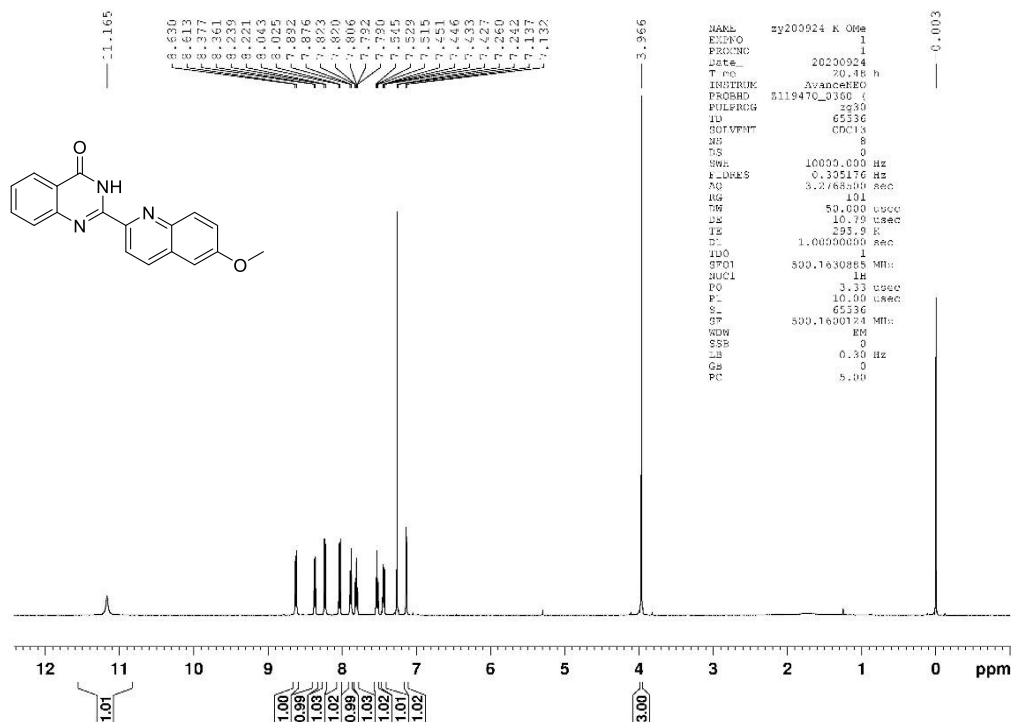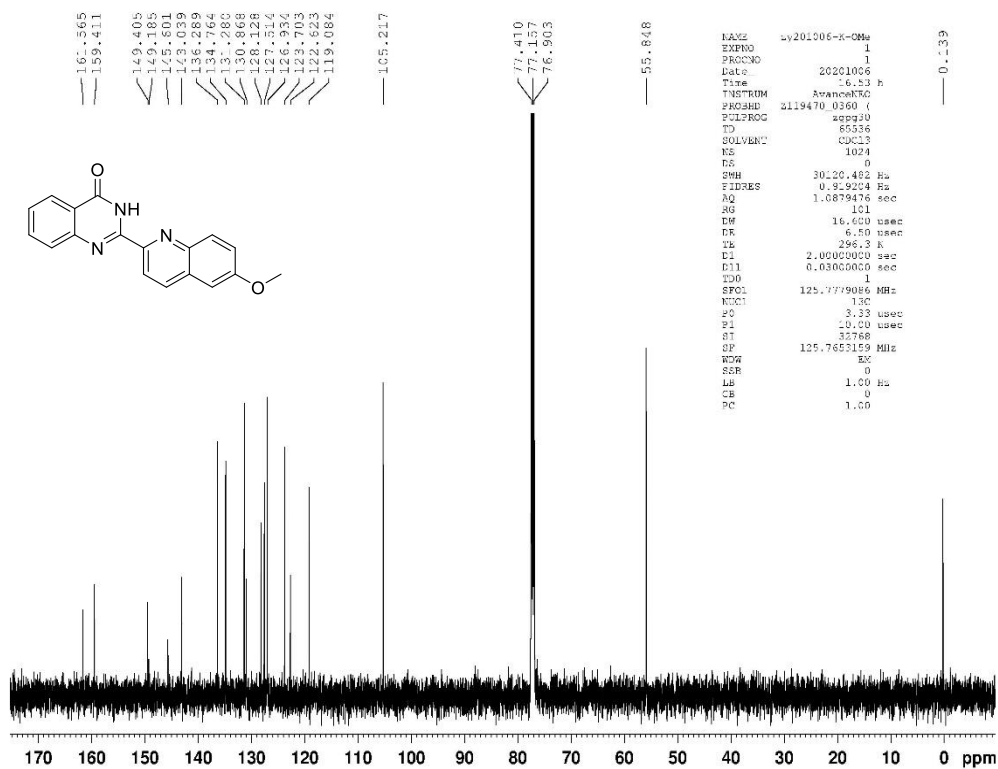

2-(6-ethoxyquinolin-2-yl)quinazolin-4(3H)-one (3ai):

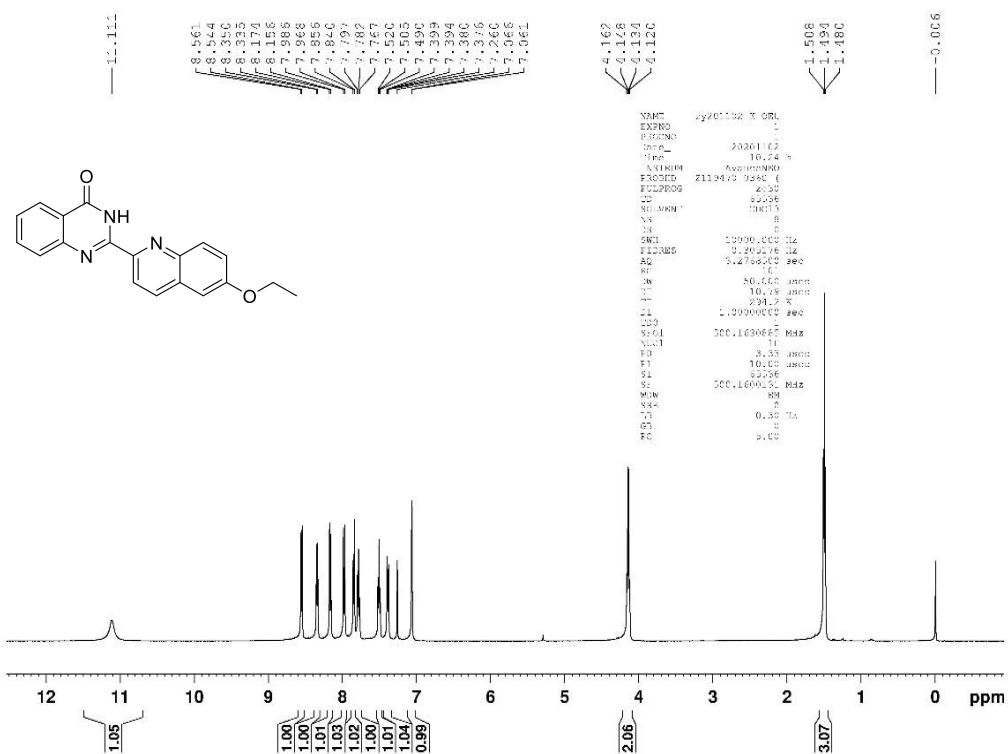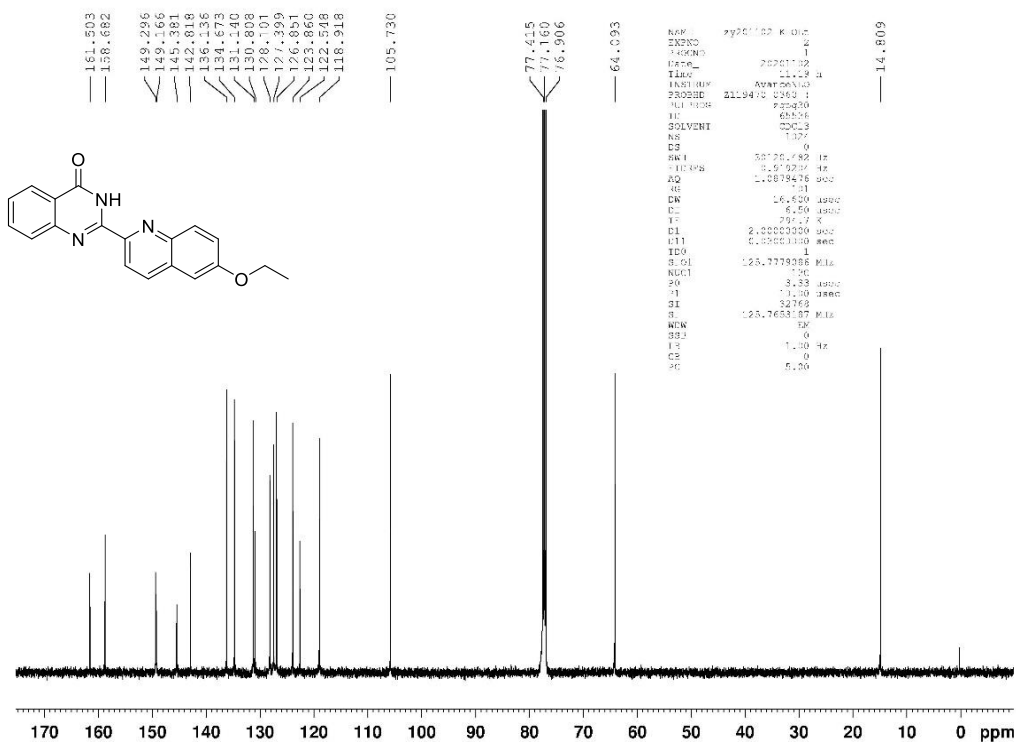

2-(6-methylquinolin-2-yl)quinazolin-4(3H)-one (3aj):

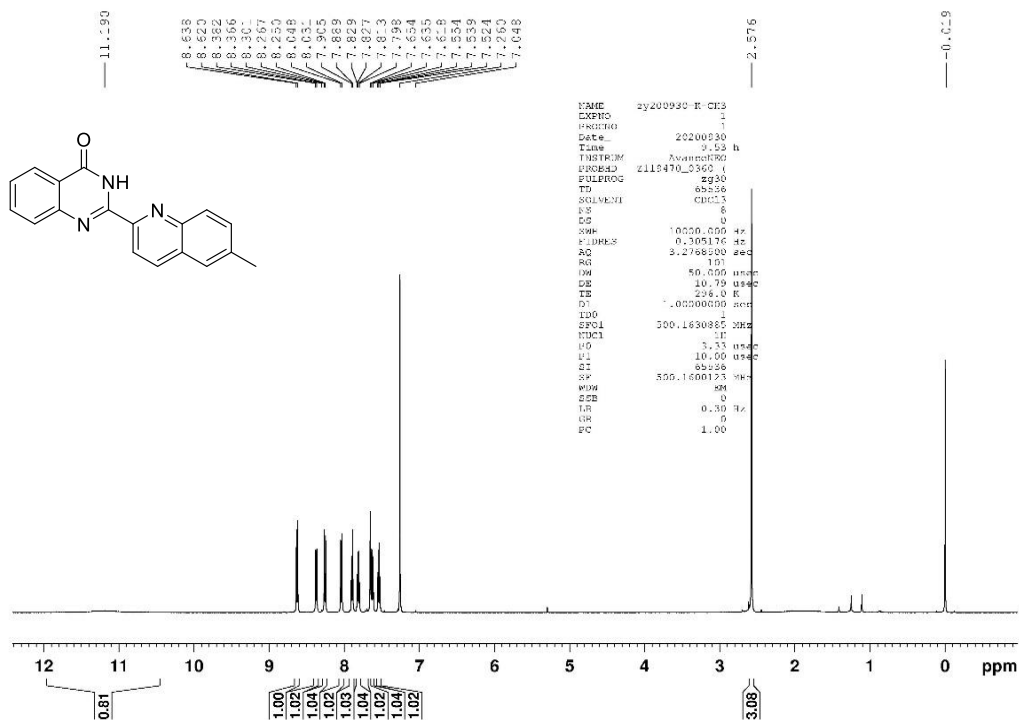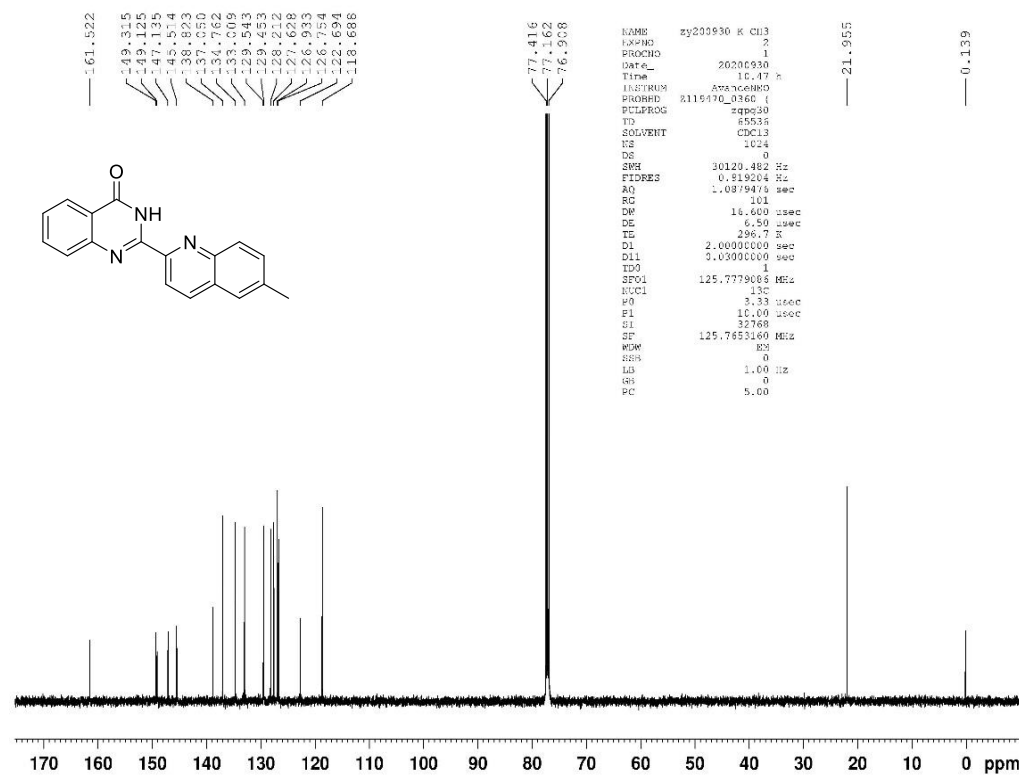



2-(6-methylquinolin-2-yl)quinazolin-4(3H)-one (3aj):

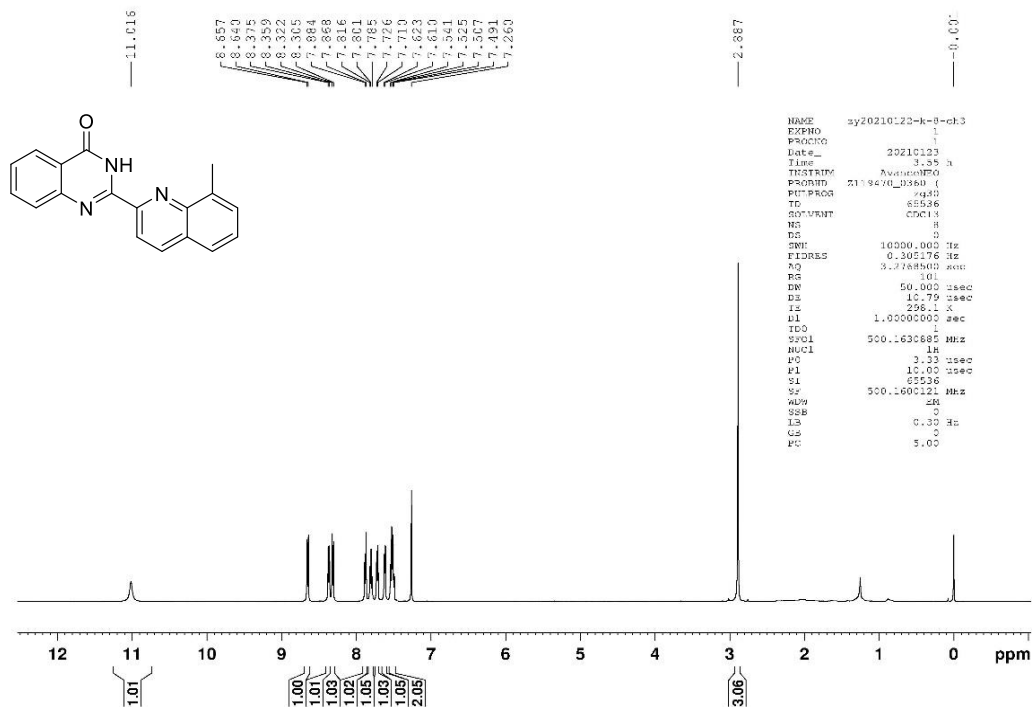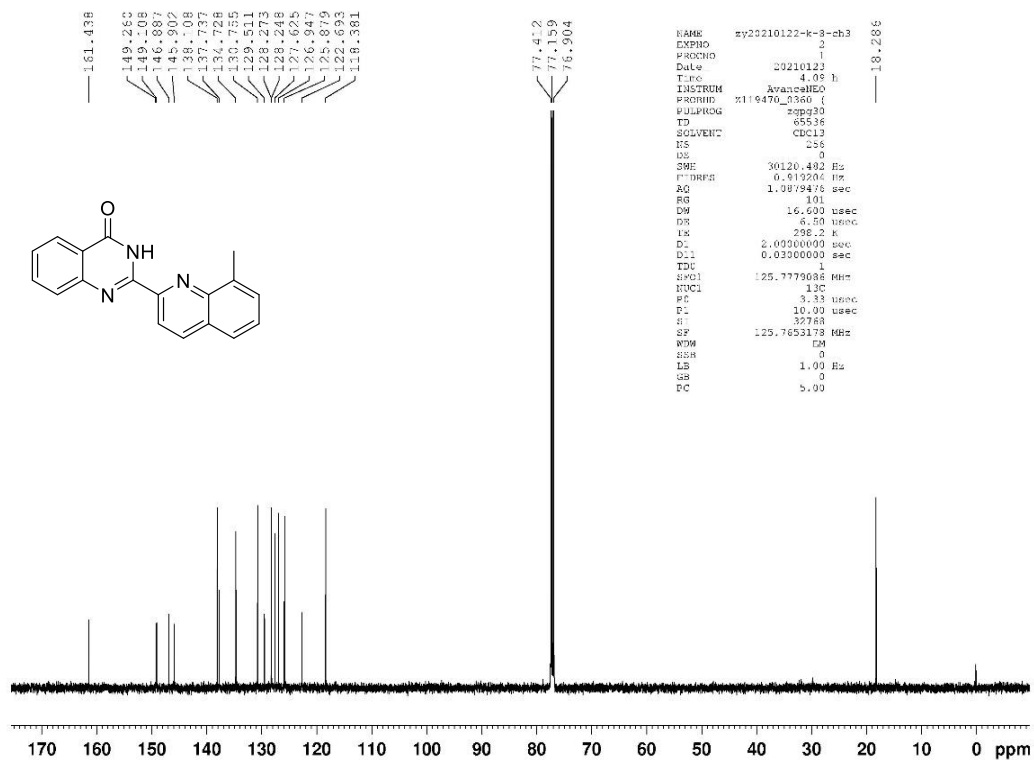

2-(6-(tert-butyl)quinolin-2-yl)quinazolin-4(3H)-one (3al):

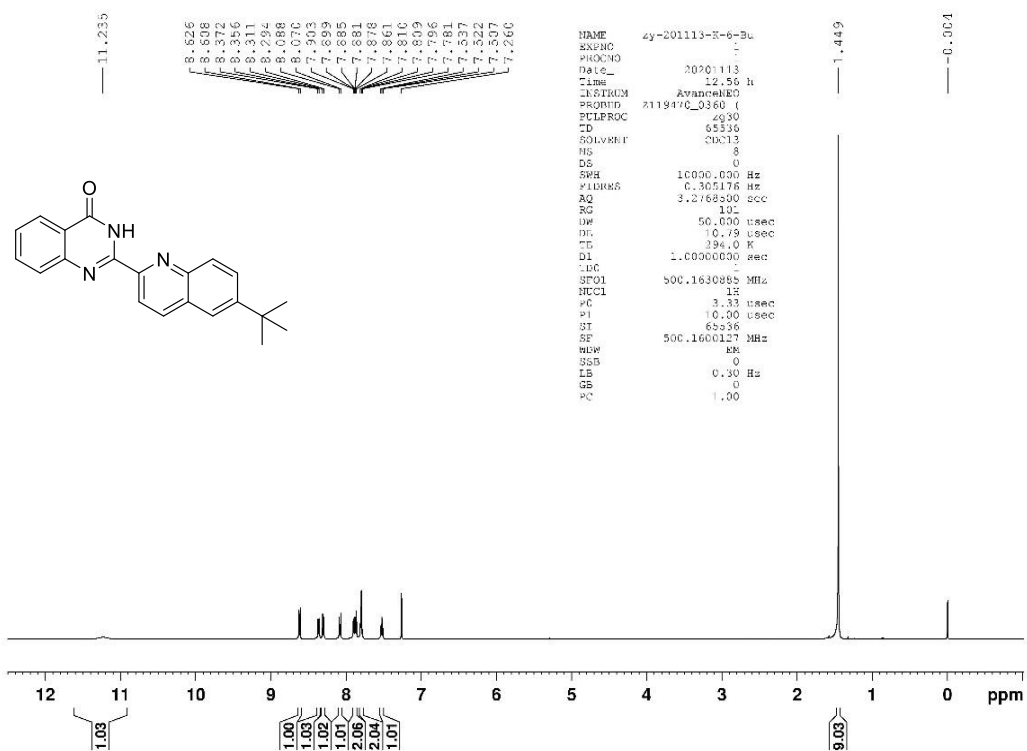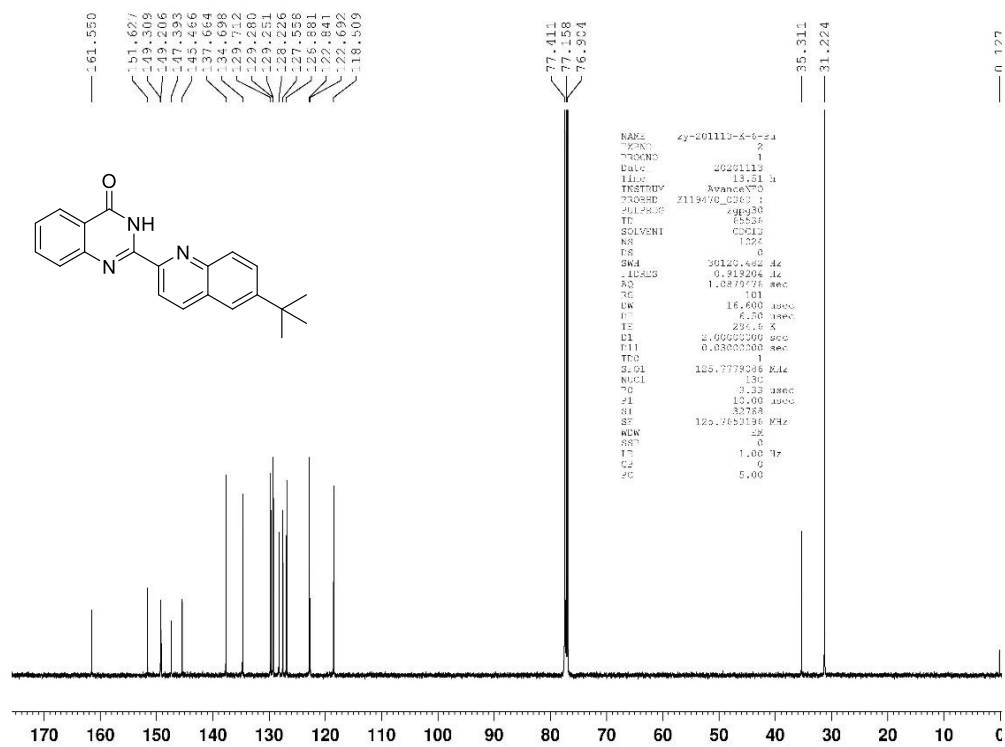

ethyl 2-(4-oxo-3,4-dihydroquinazolin-2-yl)-4-phenylquinoline-3-carboxylate (3an):

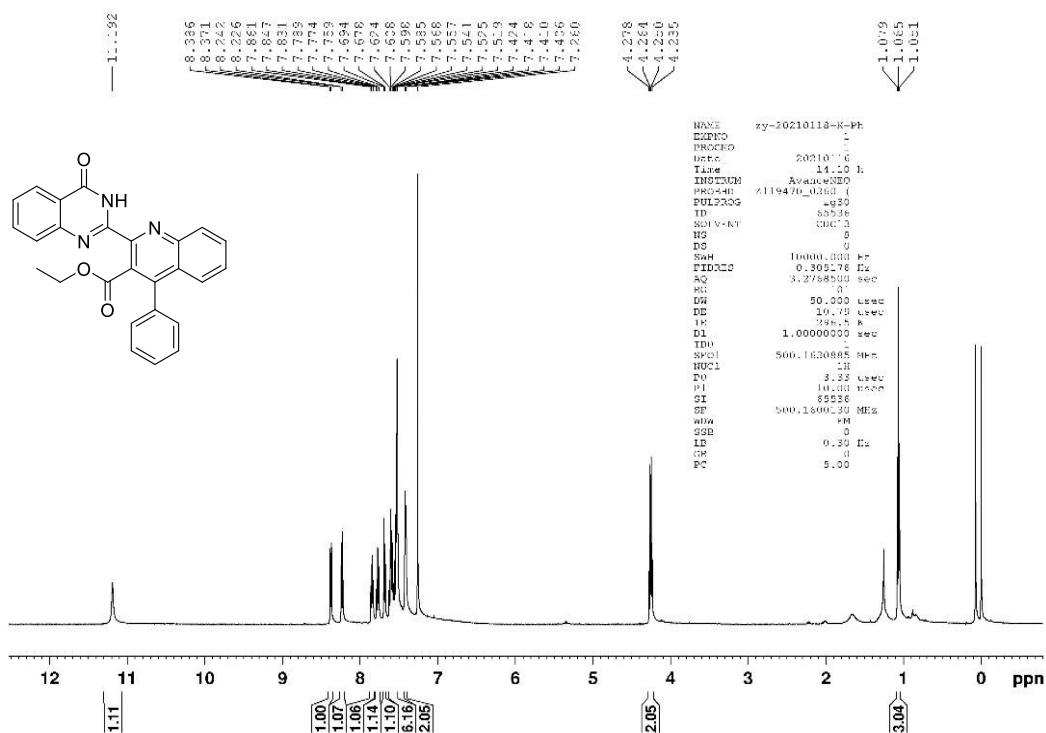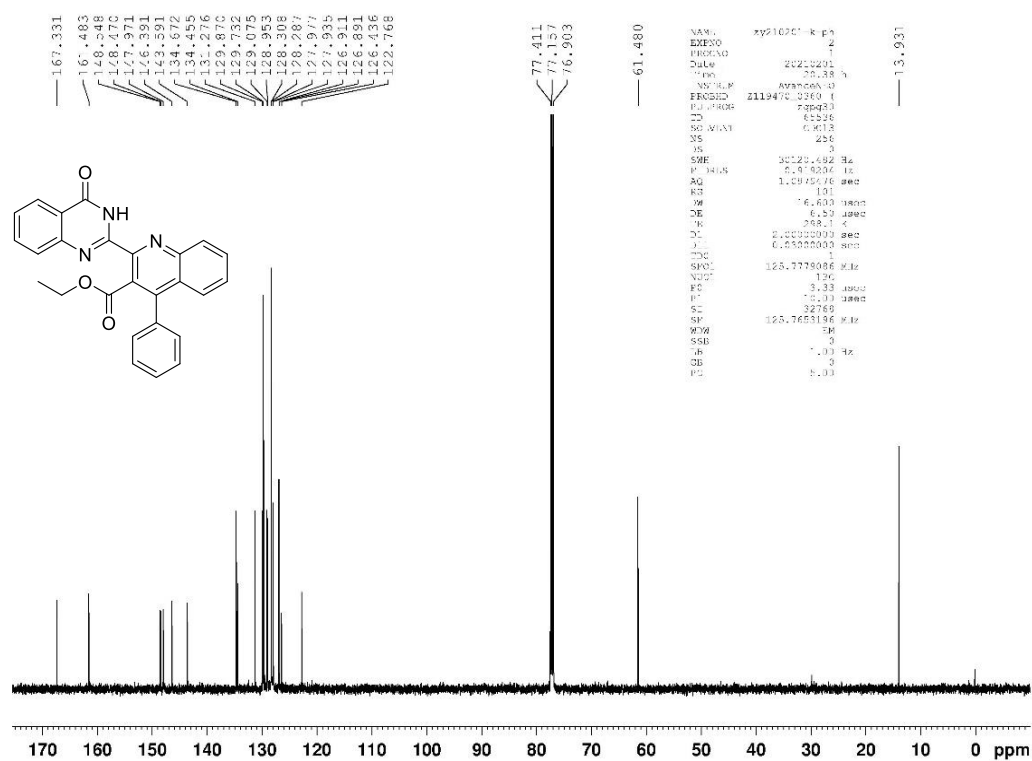

ethyl 2-(4-oxo-3,4-dihydroquinazolin-2-yl)quinoline-3-carboxylate (3ao):

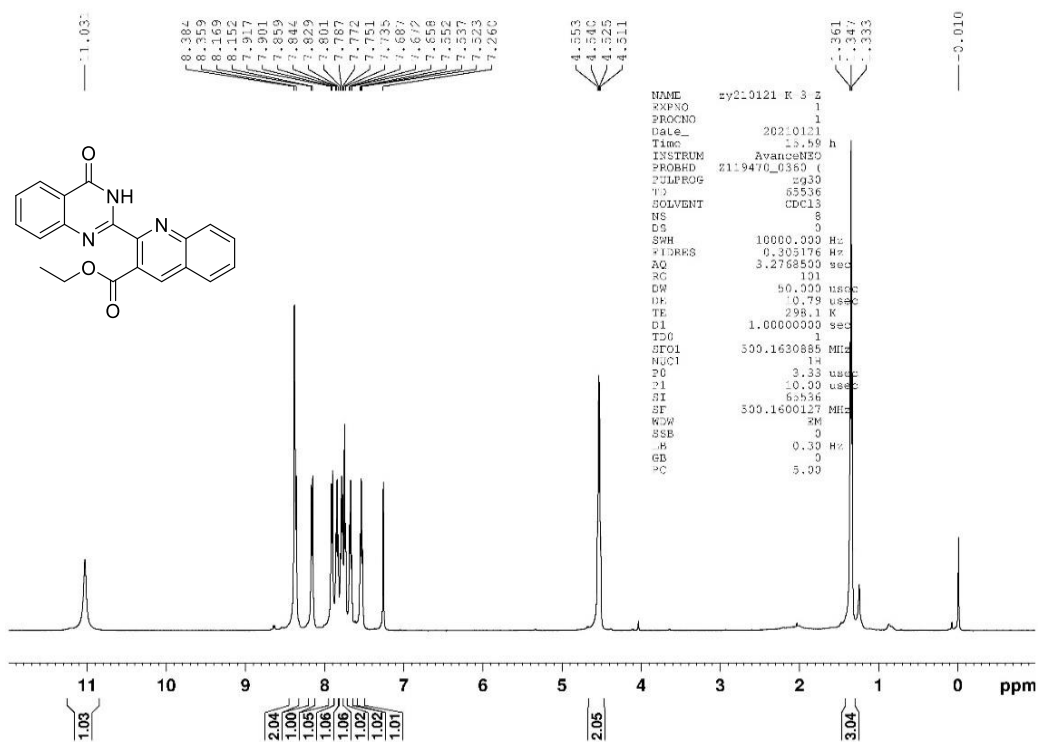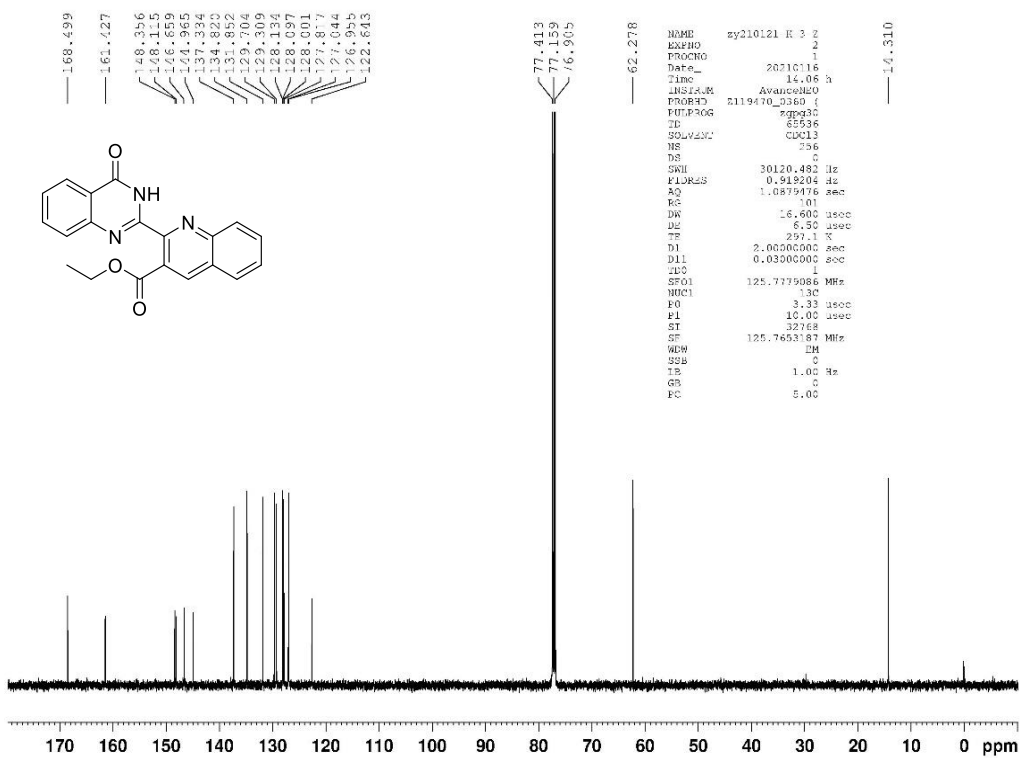

### 2-(quinolin-4-yl)quinazolin-4(3H)-one (3ap):

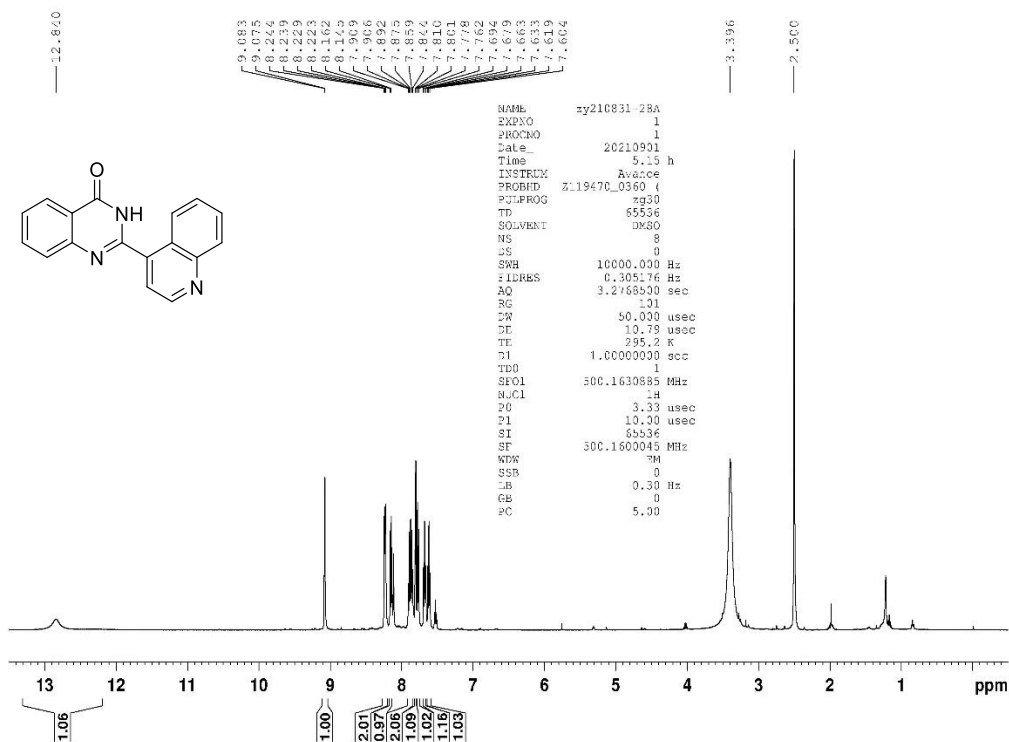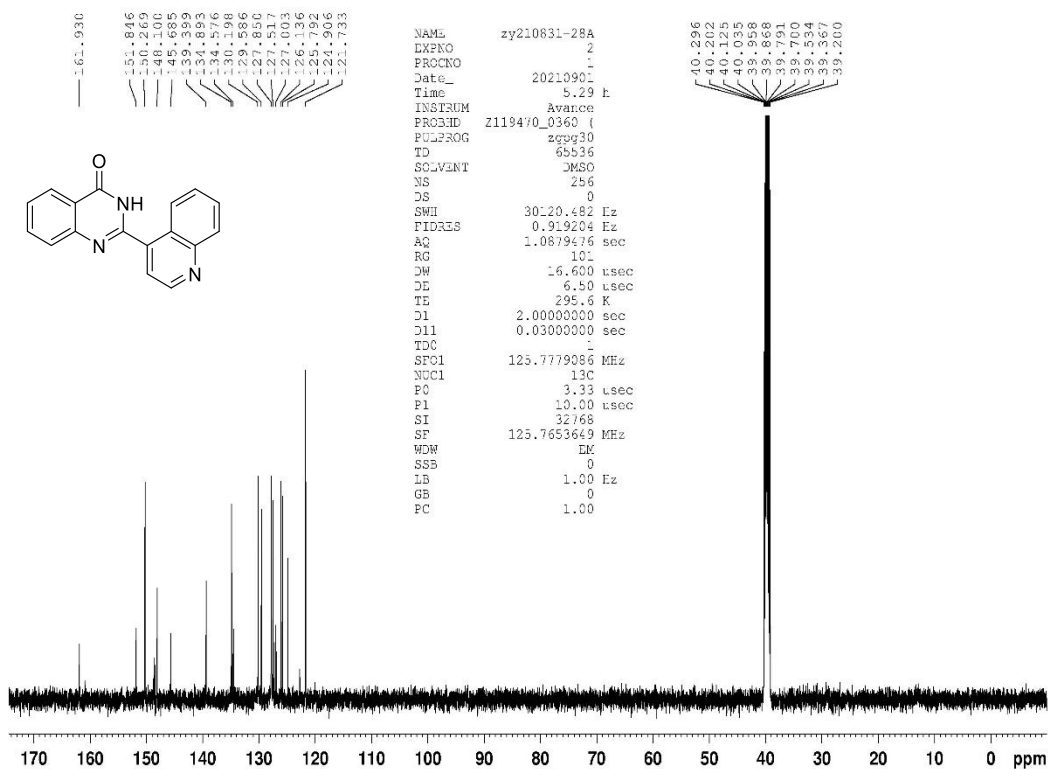

**2-(isoquinolin-1-yl)quinazolin-4(3H)-one (3aq):**

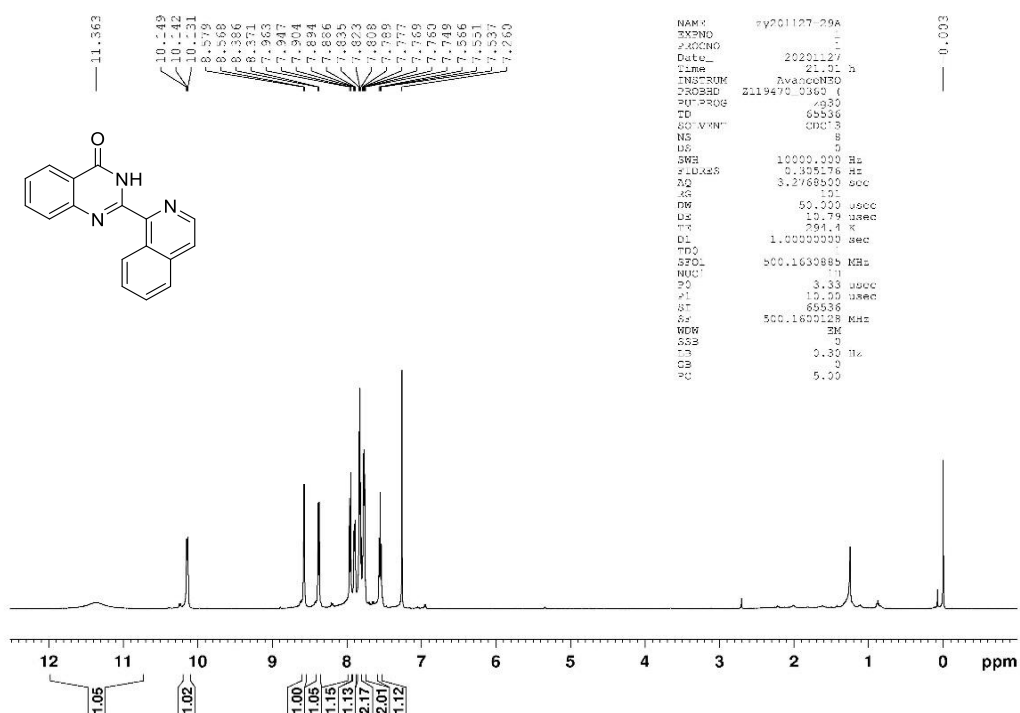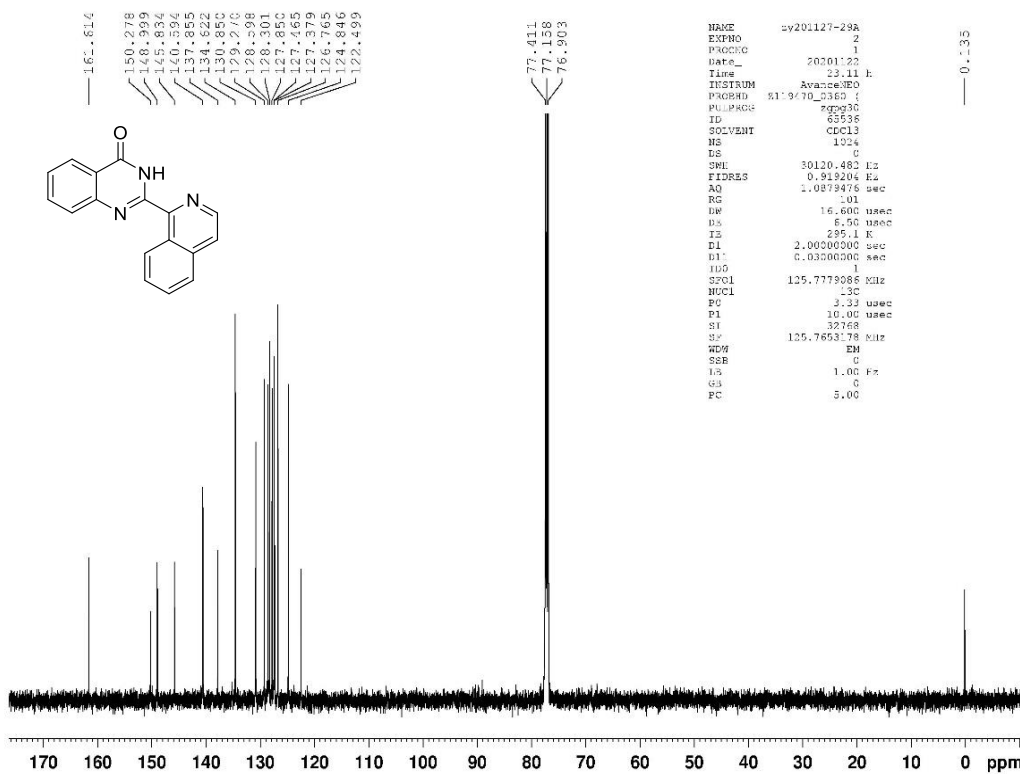

2-(pyridin-2-yl)quinazolin-4(3H)-one (3ar):

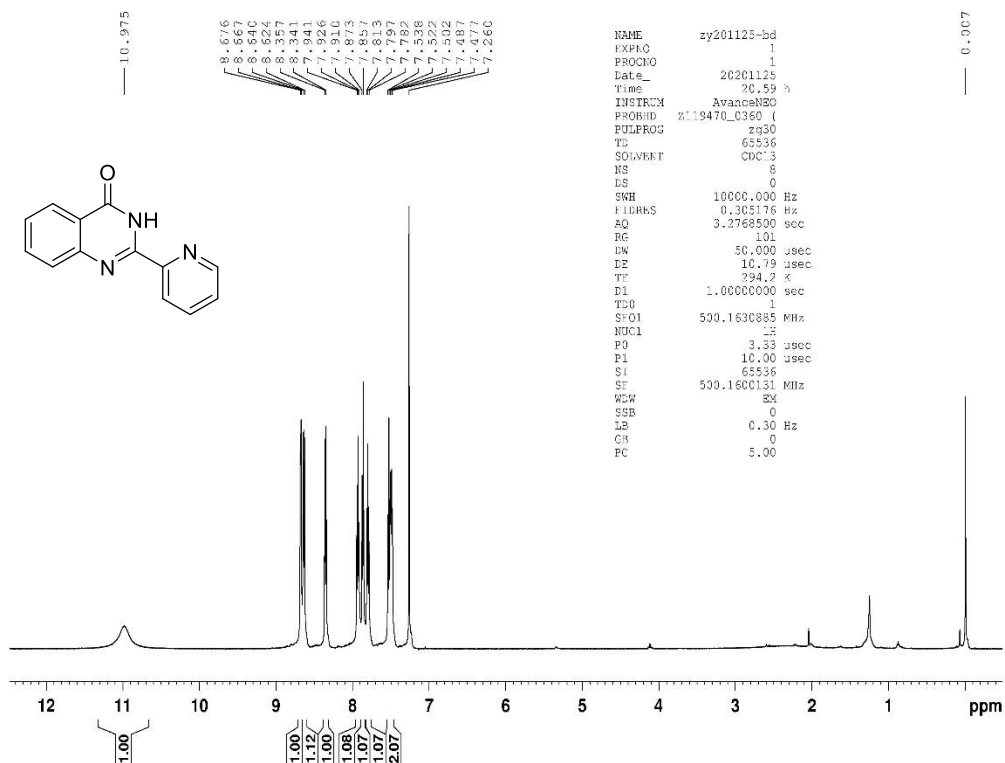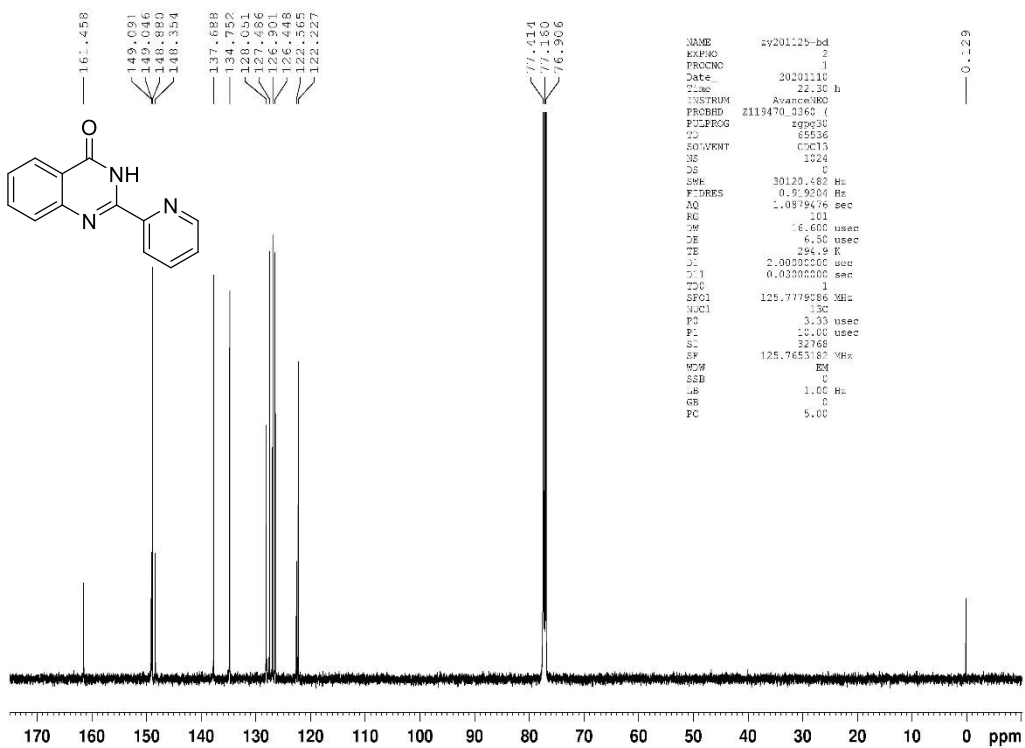

2-(5-methylpyridin-2-yl)quinazolin-4(3H)-one (3as):

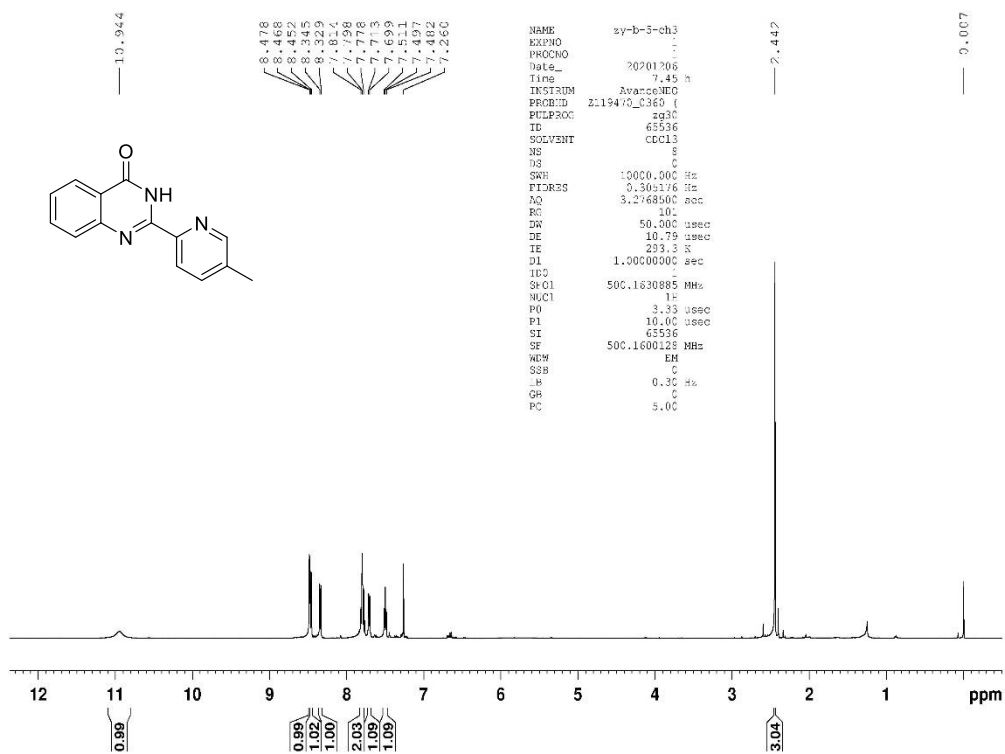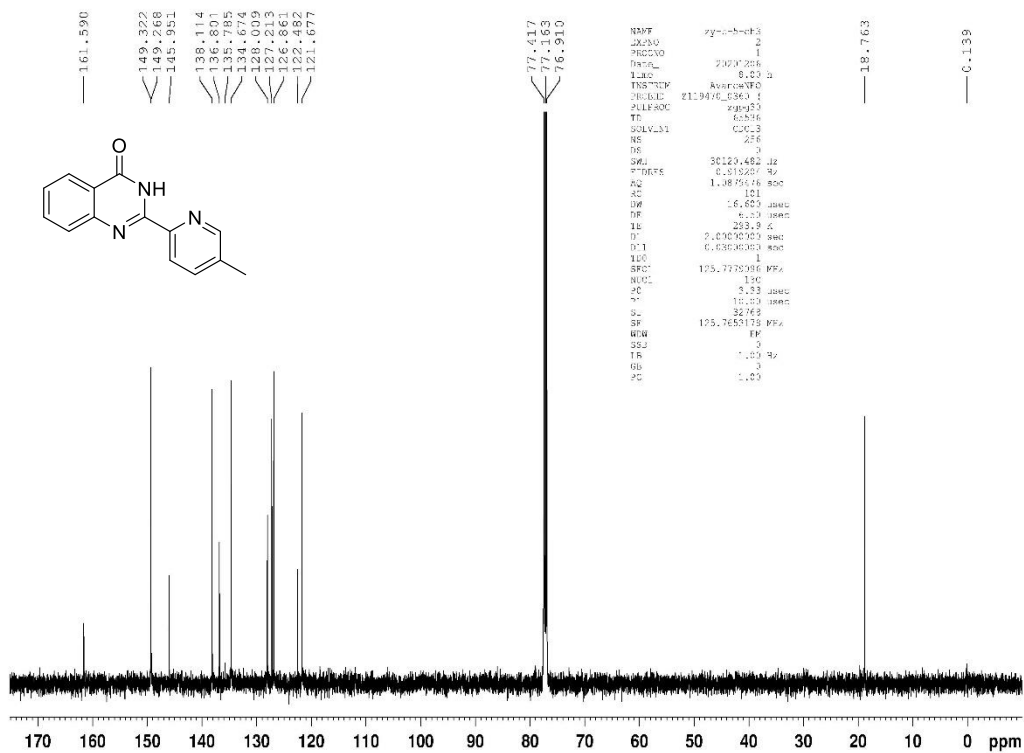



2-(6-methylpyridin-2-yl)quinazolin-4(3H)-one (3at):

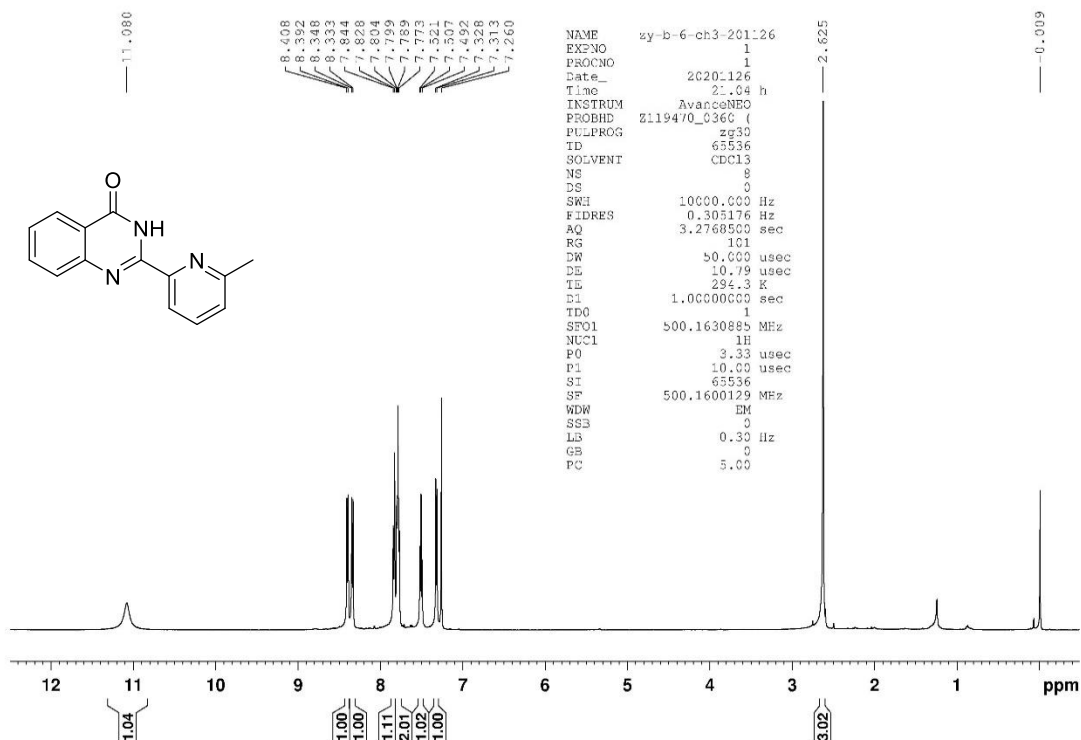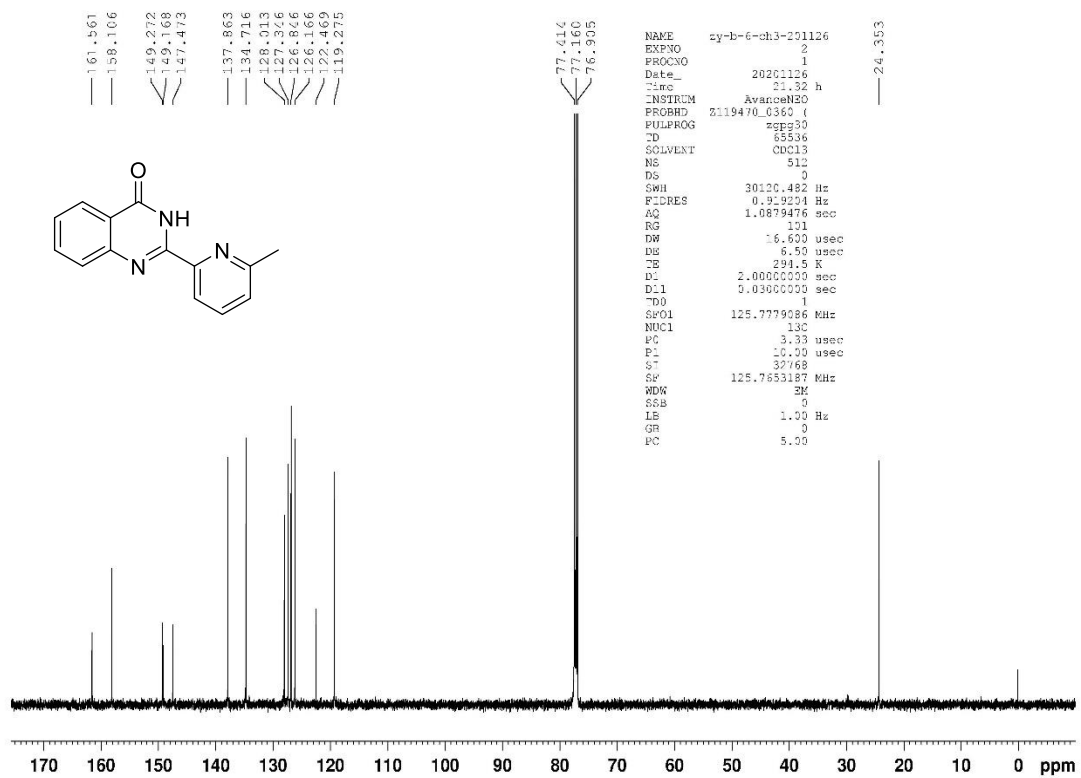

**6-fluoro-2-(pyridin-2-yl)quinazolin-4(3H)-one (3br):**

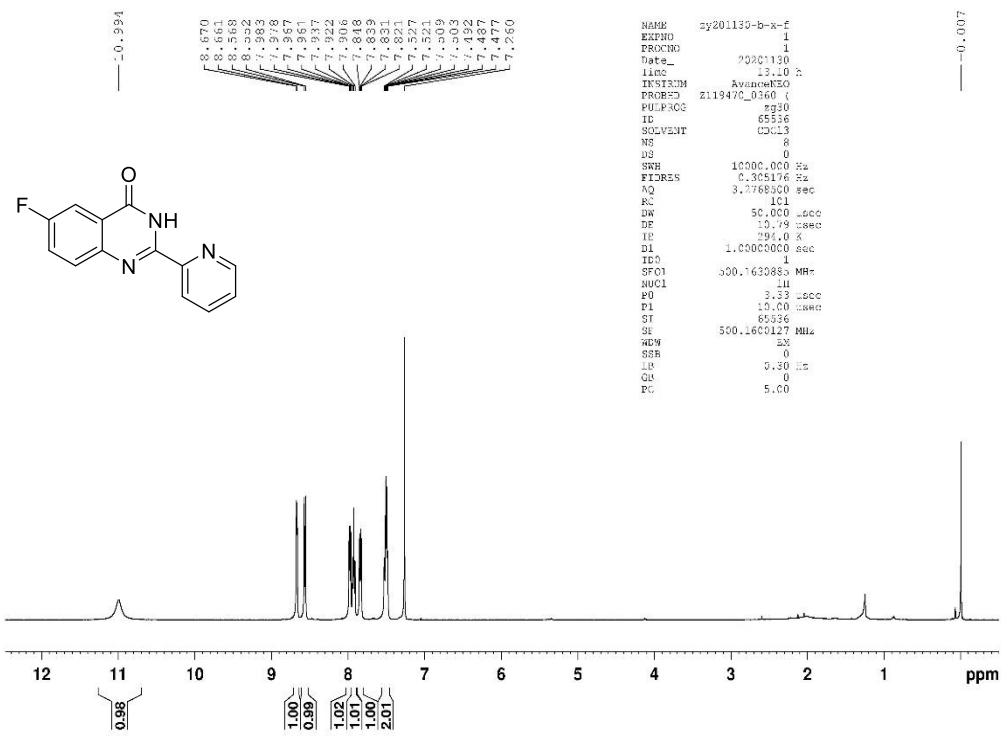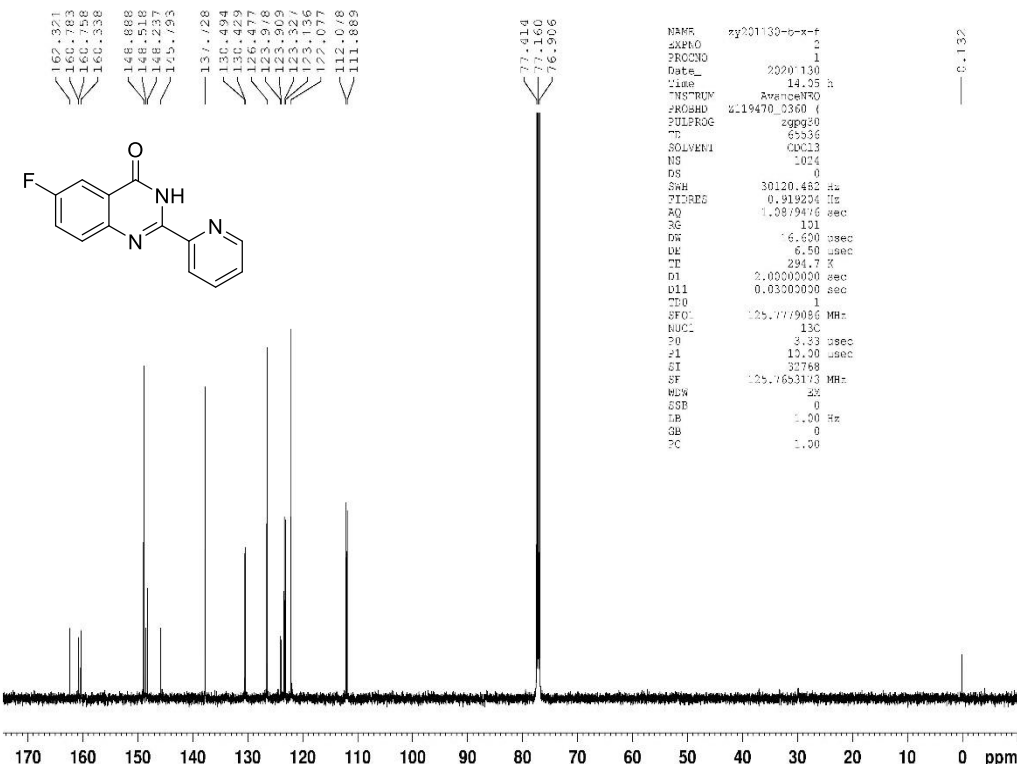

**5-bromo-2-(pyridin-2-yl)quinazolin-4(3H)-one (3hr):**

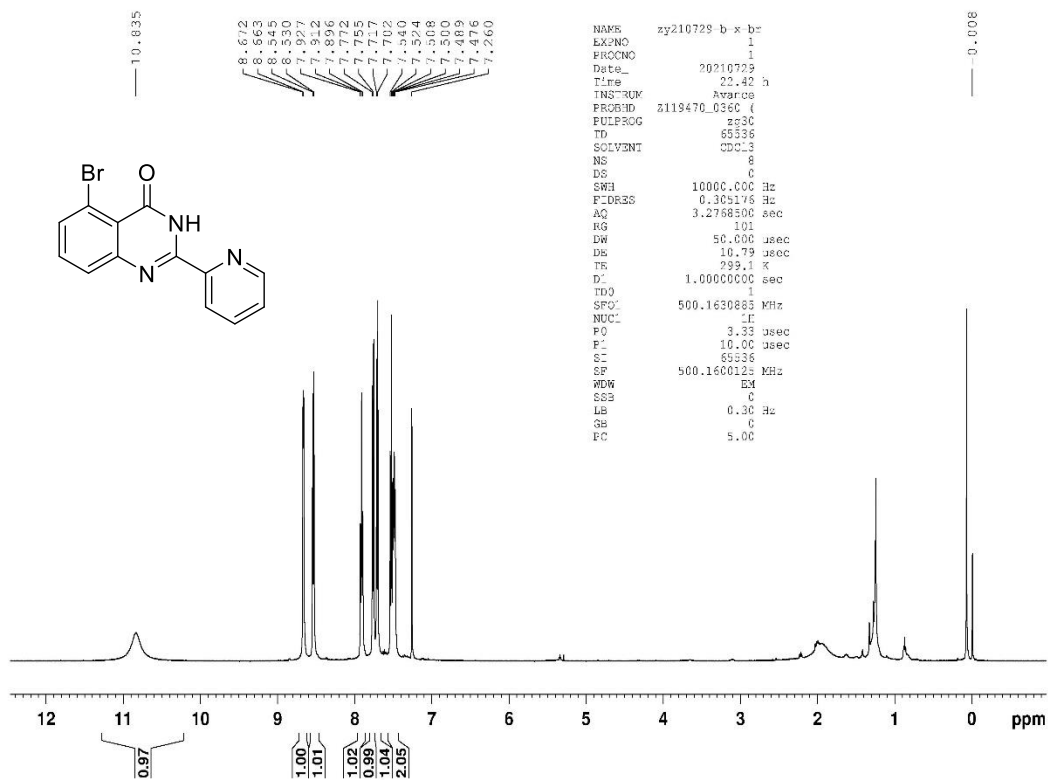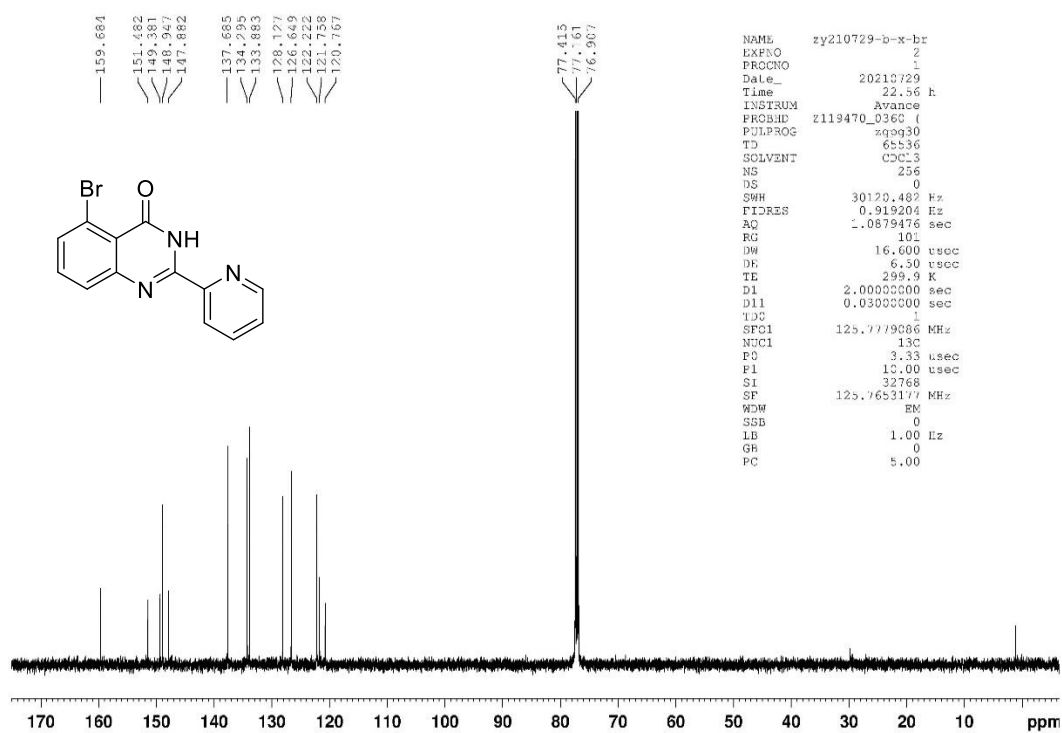

6-methyl-2-(pyridin-2-yl)quinazolin-4(3H)-one (3jr):

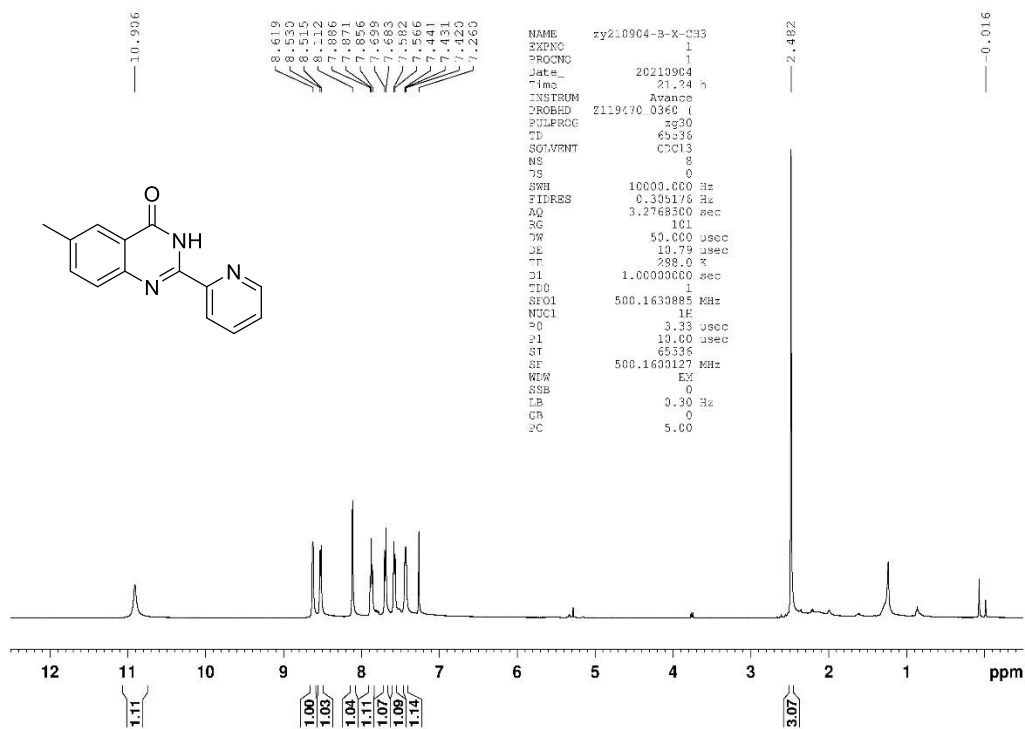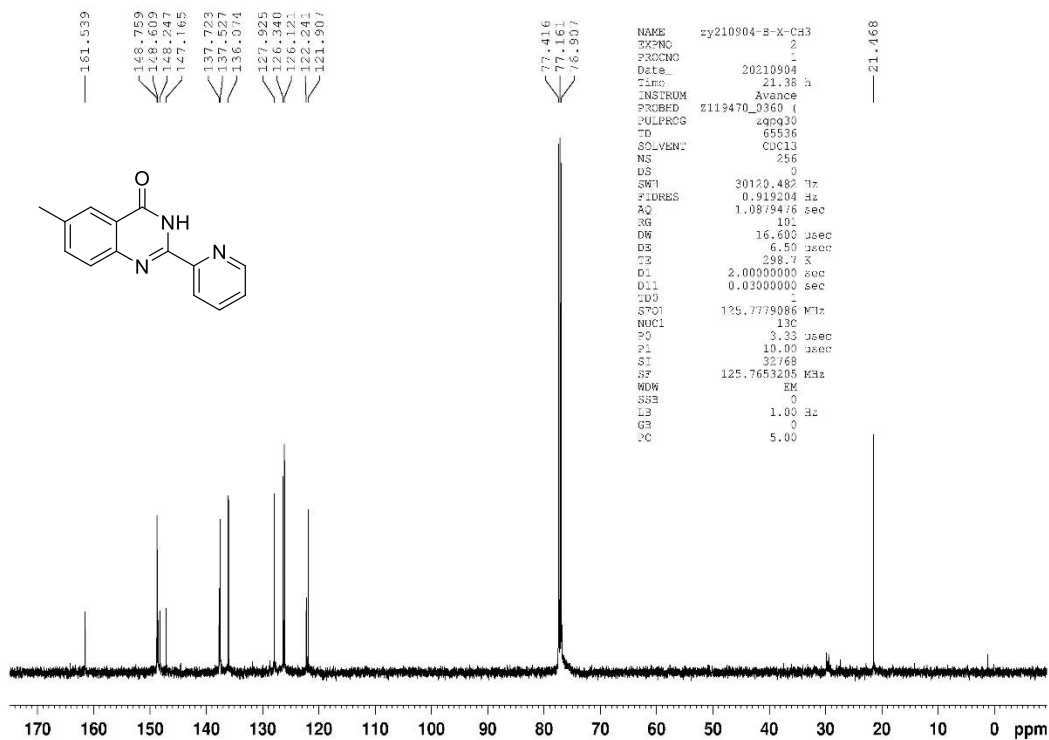

6-methoxy-2-(pyridin-2-yl)quinazolin-4(3H)-one (3kr):

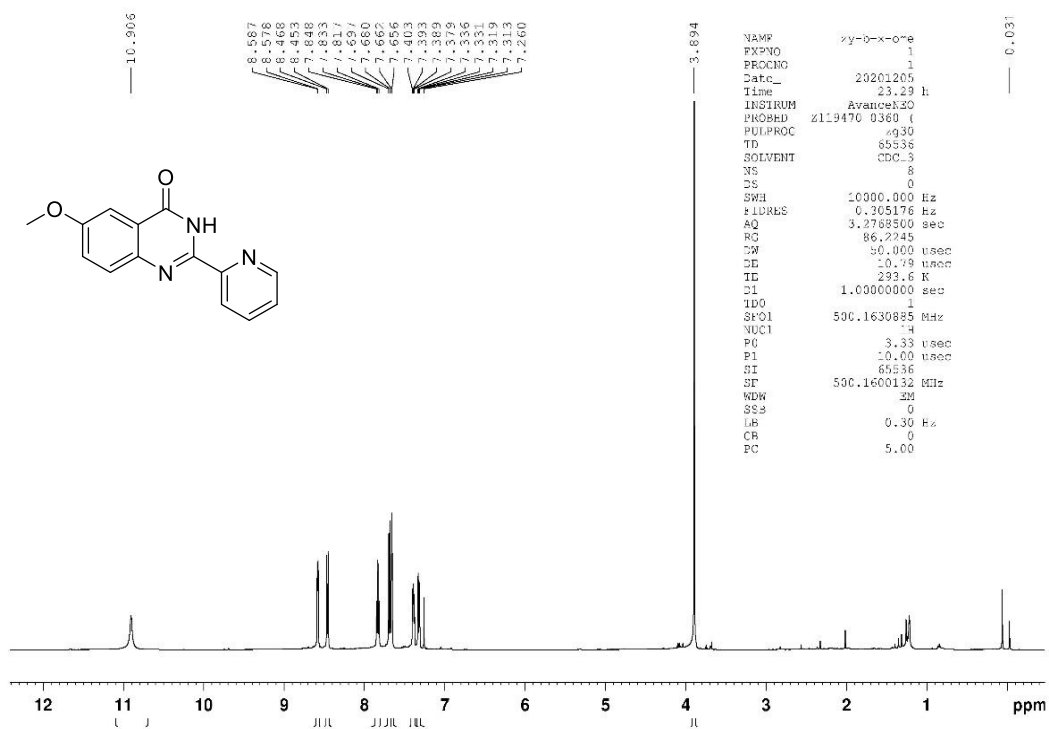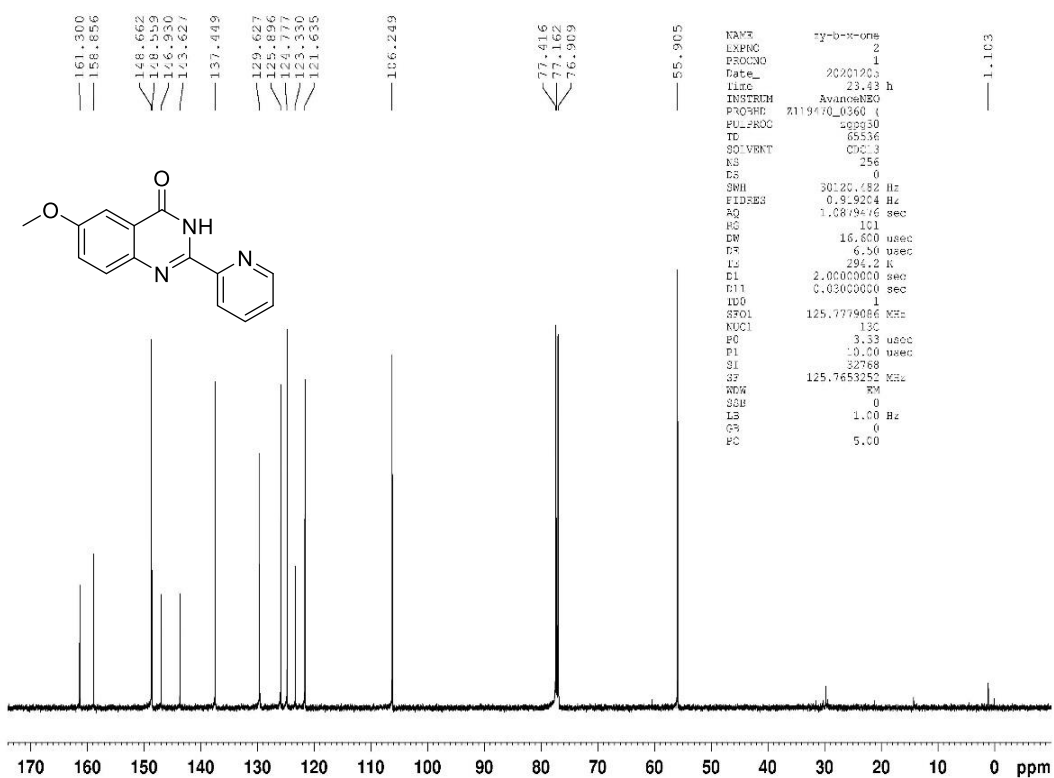

3-methyl-2-(pyridin-2-yl)quinazolin-4(3H)-one (3mr):

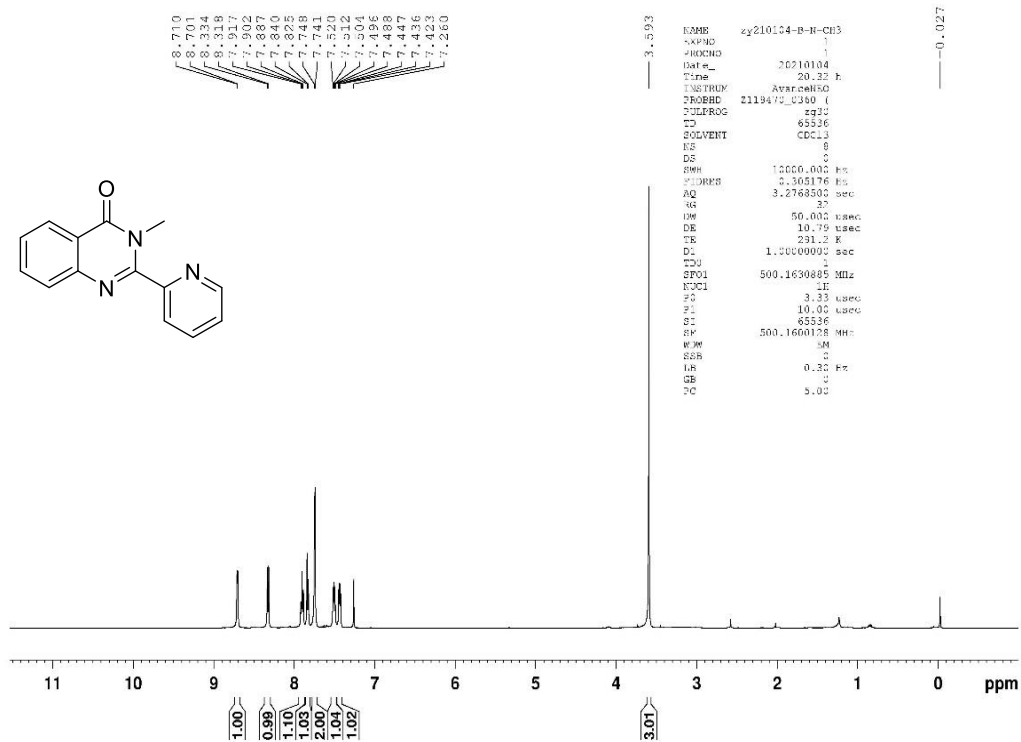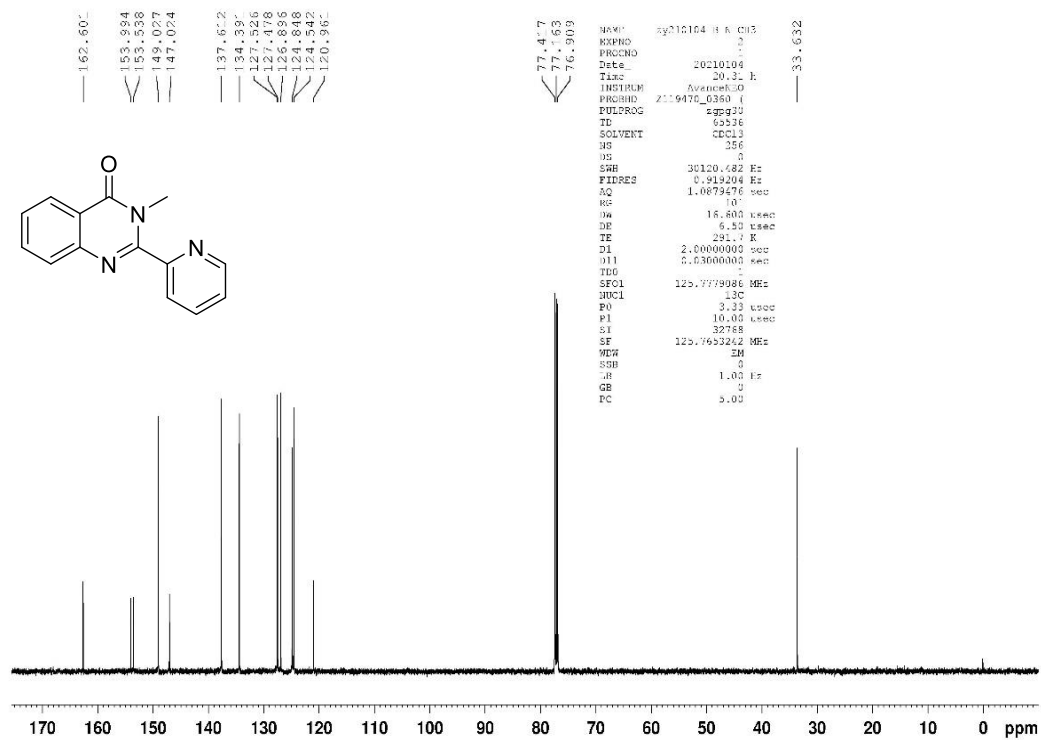

Supplement: d1cc05865g1.pdf [file d1cc05865g1.pdf]
